# Supplementary material for: NEIVAv1.0: Next-generation Emissions InVentory expansion of Akagi et al. version 1.0
Source: Copernicus journal article supplement (doi:10.5194/egusphere-2024-633), 2024-05-07
Supplement: Supplementary file 2 [file egusphere-2024-633-supplement.zip]

## Supplementary Information

**NEIVA v.1.0:**

**Next-generation Emissions InVentory expansion of Akagi et al.**

Samiha Binte Shahid<sup>1</sup>, Forrest G. Lacey<sup>2,5</sup>, Christine Wiedinmyer<sup>3</sup>, Robert J. Yokelson<sup>4</sup>, Kelley C. Barsanti<sup>1,5</sup>

<sup>1</sup>Department of Chemical & Environmental Engineering, Center for Environmental Research & Technology, University of California-Riverside, Riverside, 92521, United States

<sup>2</sup>Research Applications Laboratory, U. S. National Science Foundation National Center for Atmospheric Research, Boulder, 80301, United States

<sup>3</sup>Cooperative Institute for Research in Environmental Sciences, University of Colorado-Boulder, Boulder, CO, 80309, United States

<sup>4</sup>Department of Chemistry, University of Montana, Missoula, 59812, United States

<sup>5</sup>Atmospheric Chemistry Observations and Modeling Laboratory, U. S. National Science Foundation National Center for Atmospheric Research, Boulder, 80301, United States

*Correspondence to:* Kelley C. Barsanti (barsanti@ucar.edu)

## Table of Tables

|                                                                                                                                                                                                                                                                                                                    |    |
|--------------------------------------------------------------------------------------------------------------------------------------------------------------------------------------------------------------------------------------------------------------------------------------------------------------------|----|
| Table S1: Overview of the databases and datasets that comprise NEIVA, the backend database used in the Python script files for processing data and generating datasets, and querying features and functions, with reference to relevant sections and tables in the SI. ....                                        | 3  |
| Table S2: List of tables comprising the legacy database (ldb). Abbreviations were assigned in this work and used in subsequent tables to denote fire or fuel type. ....                                                                                                                                            | 4  |
| Table S3: Column headers and descriptions for tables in the legacy database (ldb). ....                                                                                                                                                                                                                            | 5  |
| Table S4: Types of unique id with examples. ....                                                                                                                                                                                                                                                                   | 7  |
| Table S5: List of tables comprising the raw database (rdb). Abbreviations refer to one of the 14 fuel or fire types as defined in Table S2. For publications that include multiple fuel or fire types, no abbreviation for the fuel or fire type is given. Each table includes data from a single manuscript. .... | 8  |
| Table S6: Mapping of individual fuels from FLAME-4 and FIREX laboratory studies to fire type. ....                                                                                                                                                                                                                 | 10 |
| Table S7: Domestic biomass burning categories. ....                                                                                                                                                                                                                                                                | 10 |
| Table S8: Tables comprising the primary database (pdb). ....                                                                                                                                                                                                                                                       | 12 |
| Table S9: Average EFs based on Koss et al. (2018) and % C correction factor applied to account for actual % C reported by Selimovic et al. (2018). ....                                                                                                                                                            | 15 |
| Table S10: Columns of the NEIVA integrated dataset. ....                                                                                                                                                                                                                                                           | 15 |
| Table S11: A subset of the integrated EF dataset that represents groups of compounds with equivalent ids but different names. ....                                                                                                                                                                                 | 16 |
| Table 12: The subset of grouped compounds from Table S11 after non-unique groups of compounds were combined as described in text. ....                                                                                                                                                                             | 17 |
| Table S13: The size of the integrated EF dataset through the integration steps. ....                                                                                                                                                                                                                               | 18 |
| Table S14: Reference publications used in the emission factor adjustment. ....                                                                                                                                                                                                                                     | 19 |
| Table S15: Descriptions of NMOC_g datasets selected for fractional contribution assignment. ....                                                                                                                                                                                                                   | 24 |
| Table S16: Column headers and rows in the recommended EF dataset. ....                                                                                                                                                                                                                                             | 25 |
| Table S17: Number and list of model surrogates used to represent the individual gaseous NMOCs. ....                                                                                                                                                                                                                | 25 |
| Table S18: Mapping MOZART-T1 species to SAPRC-18 model species. ....                                                                                                                                                                                                                                               | 26 |
| Table S19: Mapping GEOS-Chem model species to SAPRC-07 model species. ....                                                                                                                                                                                                                                         | 26 |
| Table 20: The compounds with unassigned GEOSChem species. ....                                                                                                                                                                                                                                                     | 27 |
| Table S21: Comparison between the summation of EF of assigned and unassigned model species of GEOS-Chem. ....                                                                                                                                                                                                      | 28 |
| Table S22: The description and units of property variables. ....                                                                                                                                                                                                                                                   | 28 |
| Table S23: Description tables comprises the backend database. ....                                                                                                                                                                                                                                                 | 37 |
| Table S24: Description of functions that displays information. ....                                                                                                                                                                                                                                                | 39 |
| Table S25: Description of functions used to query EF data and properties of NMOC_g. ....                                                                                                                                                                                                                           | 40 |

## Overview of the NEIVA Databases, Datasets, and Querying Functions and Features

| Table S1: Overview of the databases and datasets that comprise NEIVA, the backend database used in the Python script files for processing data and generating datasets, and querying features and functions, with reference to relevant sections and tables in the SI. |                                                                                                                                                                                                                                                 |                                                       |                     |
|------------------------------------------------------------------------------------------------------------------------------------------------------------------------------------------------------------------------------------------------------------------------|-------------------------------------------------------------------------------------------------------------------------------------------------------------------------------------------------------------------------------------------------|-------------------------------------------------------|---------------------|
| Data Storage Name                                                                                                                                                                                                                                                      | Description                                                                                                                                                                                                                                     | SI Section(s)                                         | SI Table(s)         |
| Legacy database (ldb)                                                                                                                                                                                                                                                  | The Akagi et al. (2011) supplemental data, including 2014 and 2015 updates, are stored as tables in this repository. There are 14 tables, one for each fire or fuel category.                                                                   | S1. Legacy and Raw Databases                          | Table S2, Table S3  |
| Raw database (rdb)                                                                                                                                                                                                                                                     | Data from selected publications (2015 or later) are stored as tables in this repository. There are 30 tables, one for each of the publications added since Akagi et al. (2011)                                                                  | S1. Legacy and Raw Databases                          | Table S5            |
| Primary database (pdb)                                                                                                                                                                                                                                                 | Data from the legacy and raw database tables were reformatted to achieve a consistent structure and combined with some additional data processing as described in the manuscript and SI. The resultant 44 tables are stored in this repository. | S2. Primary Database                                  | Table S8            |
| NEIVA output database (odb)                                                                                                                                                                                                                                            | <b>Integrated EF dataset:</b> EF data aggregated in the primary database were merged and stored in this single dataset.                                                                                                                         | S3. Integrated EF Dataset                             | Table S10-Table S13 |
|                                                                                                                                                                                                                                                                        | <b>Processed EF dataset:</b> Several data processing steps were performed prior to generating averages for the recommended EF dataset and the resultant EFs are stored in this single dataset.                                                  | S4. Processed EF Dataset                              | Table S14           |
|                                                                                                                                                                                                                                                                        | <b>Recommended EF dataset:</b> The calculated averages of all EFs for each of the 14 fire and fuel types are stored in this single dataset.                                                                                                     | S5. Recommended EF Dataset                            | Table S17           |
|                                                                                                                                                                                                                                                                        | <b>Property_Surrogate dataset:</b> Chemical and physical property data, as well as surrogate model species assignments, for each of the gaseous organic compounds in these datasets are stored in this single dataset.                          | S6. Chemical Property and Mechanism Surrogate Dataset | Table S18-Table S22 |
| Backend database                                                                                                                                                                                                                                                       | Tables that are used in the Python scripts for generating datasets and querying data are stored in this database.                                                                                                                               | S8. Backend Database                                  | Table S23           |
| n/a                                                                                                                                                                                                                                                                    | Descriptions of querying functions and features enabled by Python scripts.                                                                                                                                                                      | S9. Querying Functions and Features                   | Table S24           |

## S1. Legacy and Raw Databases

Data in the legacy and raw databases were extracted from the referenced publications and checked for duplicate values using a Python script file. Each of the supplemental tables in Akagi et al. (2011) were stored in NEIVA as a separate table as listed in **Error! Reference source not found.** Additional details on the supplemental tables, including definitions of each fire type, can be found in Akagi et al. (2011). While most of the EF data were directly imported from Akagi et al. (2011) to the legacy database (ldb) there were two exceptions:

- The ‘akagi11\_tropical\_forest’ table included a single EF\_HONO measurement made on a fire that had higher than average NO<sub>x</sub> emissions. Since there were multiple NO<sub>x</sub> measurements available, Akagi et al. (2011) used the single measured HONO/NO<sub>x</sub> ratio times the average EF\_NO<sub>x</sub> to estimate the average EF\_HONO. In the NEIVA ldb, this average EF\_HONO replaced the single EF\_HONO from Akagi et al. (2011).
- The ‘akagi11\_temperate\_forest’ table included nephelometer-based prescribed fire PM<sub>2.5</sub> EFs from Burling et al. (2011). These were not retained in the ldb, and were replaced with new PM<sub>1</sub> EFs for the same fires based on AMS data from May et al. (2014) in the rdb.

The NEIVA legacy database retained only the information from Akagi et al. (2011) that is listed in **Error! Reference source not found.** below; the footnotes and equations in the Akagi et al. (2011) supplemental tables were not retained.

In general, each row in the legacy and raw databases represents a compound or formula, and the attributes of that compound or formula are represented in the columns. In some of the tables, the first few rows are used to provide descriptive information about the measurements, such as modified combustion efficiency and analytical method. The columns in the raw database are the same as listed in **Error! Reference source not found.** for the legacy database, with the exception of the UNC and AVG columns. In the raw database, if uncertainty was reported in the source publication, then a UNC column was included; there are no AVG columns. The legacy and raw databases include the id column described below, with assignments illustrated in Table S4.

| Table S2: List of tables comprising the legacy database (ldb). Abbreviations were assigned in this work and used in subsequent tables to denote fire or fuel type. |                                                  |                                    |
|--------------------------------------------------------------------------------------------------------------------------------------------------------------------|--------------------------------------------------|------------------------------------|
| Table Name                                                                                                                                                         | Source (Akagi et al., 2011 supplementary tables) | Pollutant Categories               |
| ldb_savanna (sv)                                                                                                                                                   | S1. Savanna                                      | inorganic gas, methane, NMOC_g, PM |
| ldb_boreal_forest (bf)                                                                                                                                             | S2. Boreal forest                                | inorganic gas, methane, NMOC_g, PM |
| ldb_tropical_forest (trf)                                                                                                                                          | S3. Tropical forest                              | inorganic gas, methane, NMOC_g, PM |
| ldb_temperate_forest (tmf)                                                                                                                                         | S4. Temperate forest                             | inorganic gas, methane, NMOC_g, PM |
| ldb_peat (p)                                                                                                                                                       | S5. Peat                                         | inorganic gas, methane, NMOC_g, PM |
| ldb_chaparral (chp)                                                                                                                                                | S6. Chaparral                                    | inorganic gas, methane, NMOC_g, PM |
| ldb_open_cooking (ocook)                                                                                                                                           | S7. Open cooking                                 | inorganic gas, methane, NMOC_g, PM |
| ldb_cookstove (cs)                                                                                                                                                 | S8. Cookstove                                    | inorganic gas, methane, NMOC_g, PM |
| ldb_dung_burning (db)                                                                                                                                              | S9. Dung burning                                 | inorganic gas, methane, NMOC_g, PM |
| ldb_charcoal_making (chrm)                                                                                                                                         | S10. Charcoal making                             | inorganic gas, methane, NMOC_g, PM |
| ldb_charcoal_burning (chrb)                                                                                                                                        | S11. Charcoal burning                            | inorganic gas, methane, NMOC_g, PM |

|                              |                          |                                    |
|------------------------------|--------------------------|------------------------------------|
| ldb_pasture_maintenance (pm) | S12. Pasture maintenance | inorganic gas, methane, NMOC_g, PM |
| ldb_crop_residue (cr)        | S13. Crop residue        | inorganic gas, methane, NMOC_g, PM |
| ldb_garbage_burning (gb)     | S14. Garbage burning     | inorganic gas, methane, NMOC_g, PM |

| Table S3: Column headers and descriptions for tables in the legacy database (ldb). |                                                                                                                                                                                                                                                                                                                          |
|------------------------------------------------------------------------------------|--------------------------------------------------------------------------------------------------------------------------------------------------------------------------------------------------------------------------------------------------------------------------------------------------------------------------|
| Column Name                                                                        | Description                                                                                                                                                                                                                                                                                                              |
| mm                                                                                 | Molar mass                                                                                                                                                                                                                                                                                                               |
| formula                                                                            | Chemical formula                                                                                                                                                                                                                                                                                                         |
| compound                                                                           | Compound name (as reported in the source publication)                                                                                                                                                                                                                                                                    |
| pollutant_category                                                                 | Categorizes the type of pollutant as either inorganic gas, methane, gaseous non-methane organic compound (NMOC_g), particulate non-methane organic compound (NMOC_p) or particulate matter (PM).                                                                                                                         |
| EF                                                                                 | All emission factor column names start with the string 'EF_akagi11_' and are then combined with the name from Akagi et al. (2011) that indicates fuel type and original data source; for example, 'EF_akagi11_boreal_organic_soil_bertschi03'.                                                                           |
| UNC                                                                                | UNC is the uncertainty reported in Akagi et al. (2011). The column name is analogous to the EF column name, where 'EF' is replaced with 'UNC'; for example, 'UNC_akagi11_boreal_organic_soil_bertschi03'. UNC is retained for individual studies and averaged across fuel/fire types as reported in Akagi et al. (2011). |
| AVG                                                                                | Average is the weighted average EF reported in Akagi et al. (2011) for each fuel/fire type. The column name is analogous to the EF column name, where 'EF' is replaced 'AVG'; for example, 'AVG_akagi11_boreal_forest'.                                                                                                  |
| id                                                                                 | Unique identifier assigned in the development of NEIVA                                                                                                                                                                                                                                                                   |

In order to create a merged dataset and link tables within NEIVA, each organic compound was assigned a unique identifier (id), including unidentified organic compounds designated by a formula. Unique ids were assigned through a hierarchical process, illustrated in Figure S1, in which preference was given to the use of the IUPAC international chemical identifier (InChI). InChI were assigned using Python packages (e.g., PubChemPy) and in-house web scrapers to access the online databases PubChem (Kim et al., 2021), NIST (NIST Chemistry WebBook, 2022), and ChemSpider (Pence and Williams, 2010) from which the InChI were obtained (Type 1 id). In some cases, EFs were reported for a group of identified compounds rather than individual compounds. For such cases, the unique ID was assigned as the exact mass and the chemical formula (Type 2 id). Finally, in some cases, EFs were reported for compounds with a known chemical formula but an unknown structure, and thus an InChI could not be assigned. For such compounds, the analytical method was used to generate the unique ID (Type 4 id). For compounds or groups of compounds detected using FTIR or PTR-TOF-MS, the unique ID was the exact or protonated mass (depending on what was reported in the source publication) and the chemical formula (e.g., 'butenes' was assigned the ID '56.0626\_C4H8'). For compounds detected using GC×GC-TOF-MS, a combined string of the first- and second-dimension retention times was used to create the unique ID (e.g., a C<sub>11</sub>H<sub>14</sub> isomer was assigned the ID '1769.44\_1.729'). Table S4 illustrates each of the types of unique IDs assigned. **Error! Reference source not found.** provides the list of tables that comprise the raw database.



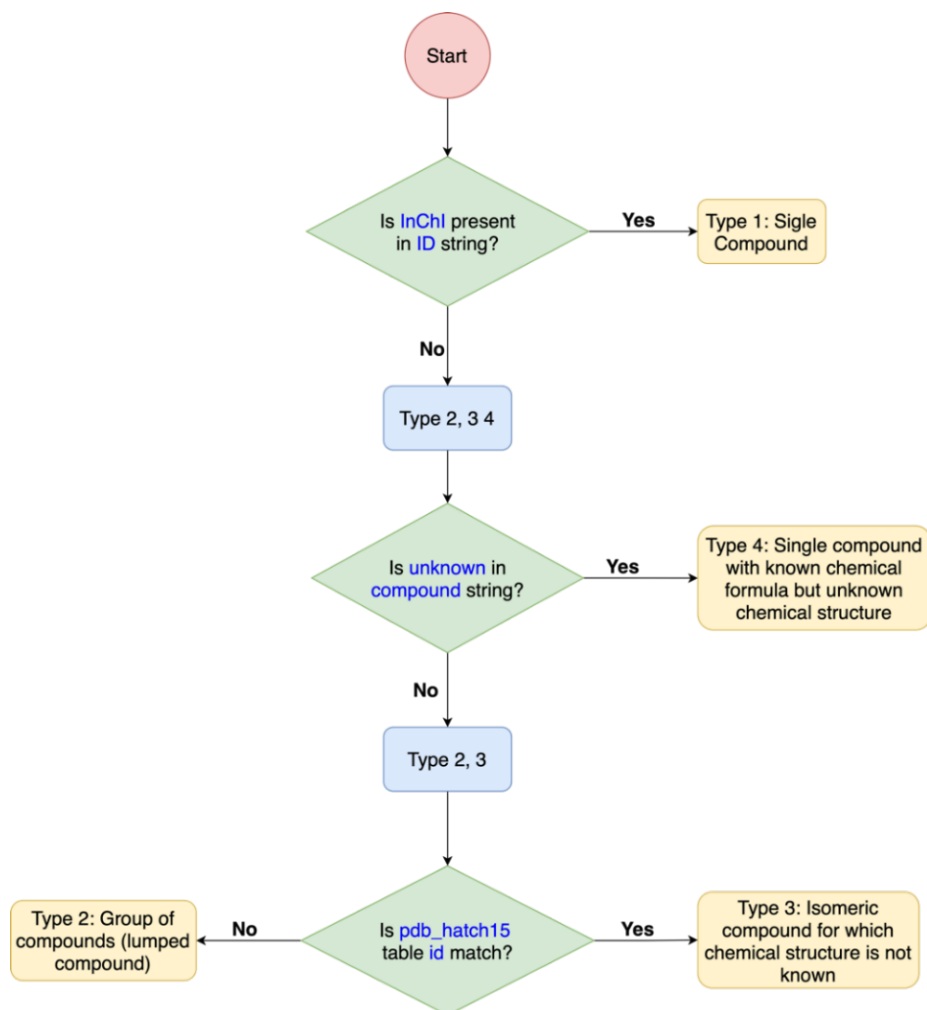

**Figure S1:** Flowchart illustrating hierarchical process for assigning unique identifiers (id) to organic compounds in NEIVA.

| Table S4: Types of unique id with examples.                                                                                                |                                 |                                         |                                                                                         |
|--------------------------------------------------------------------------------------------------------------------------------------------|---------------------------------|-----------------------------------------|-----------------------------------------------------------------------------------------|
| Type                                                                                                                                       | Example                         |                                         |                                                                                         |
|                                                                                                                                            | Formula                         | Compound/<br>Compound Class             | ID                                                                                      |
| <b>Type 1:</b> Single compound classified using InChI.                                                                                     | C <sub>10</sub> H <sub>16</sub> | Camphene                                | InChI=1S/C <sub>10</sub> H <sub>16</sub> /c1-7-8-4-5-9(6-8)10(7,2)3/h8-9H,1,4-6H2,2-3H3 |
| <b>Type 2:</b> Group of compounds ('lumped compound') classified using exact or protonated mass + formula.                                 | C <sub>10</sub> H <sub>16</sub> | Monoterpenes                            | 136.12416000000002_C <sub>10</sub> H <sub>16</sub>                                      |
| <b>Type 3:</b> One or more isomeric compounds for which chemical structure is not known, classified using first and second retention time. | C <sub>10</sub> H <sub>16</sub> | C <sub>10</sub> H <sub>16</sub> isomers | 1069.66_1.091                                                                           |
| <b>Type 4:</b> Single compound with known chemical formula but unknown chemical structure.                                                 | C <sub>4</sub> H <sub>5</sub> O | unknown                                 | 69.03346_C <sub>4</sub> H <sub>6</sub> O                                                |

Table S5: List of tables comprising the raw database (rdb). Abbreviations refer to one of the 14 fuel or fire types as defined in Table S2. For publications that include multiple fuel or fire types, no abbreviation for the fuel or fire type is given. Each table includes data from a single manuscript.

| Fire Type        | Table Name            | Pollutant Categories                       | Source                                                                                  | DOI                                                                                           |
|------------------|-----------------------|--------------------------------------------|-----------------------------------------------------------------------------------------|-----------------------------------------------------------------------------------------------|
| Savanna          | rdb_sv_desservettaz20 | inorganic gas, methane, PM, NMOC_p         | Table 4, Column: This Study                                                             | <a href="https://doi.org/10.1002/2016JD025925">doi.org/10.1002/2016JD025925</a>               |
| Boreal forest    | rdb_bf_hayden22       | inorganic gas, NMOC_g, PM                  | Table A1                                                                                | <a href="https://doi.org/10.5194/acp-22-12493-2022">doi.org/10.5194/acp-22-12493-2022</a>     |
| Tropical forest  | rdb_trf_hodgson18     | inorganic gas, methane, PM                 | Table 3 Row- Rondonia This Study, Table 4 Row- Rondonia This Study, Tocantis This Study | <a href="https://doi.org/10.5194/acp-18-5619-2018">doi.org/10.5194/acp-18-5619-2018</a>       |
| Temperate forest | rdb_tmf_gkatzelis23   | inorganic gas, methane, NMOC_g, PM         | Table 3                                                                                 | <a href="https://doi.org/10.5194/egusphere-2023-1439">doi.org/10.5194/egusphere-2023-1439</a> |
|                  | rdb_tmf_permar21      | inorganic gas, methane, NMOC_g, PM         | Table 2                                                                                 | <a href="https://doi.org/10.1029/2020JD033838">doi.org/10.1029/2020JD033838</a>               |
|                  | rdb_tmf_liu17         | inorganic gas, methane, NMOC_g, PM         | Table 3                                                                                 | <a href="https://doi.org/10.1002/2016jD026315">doi.org/10.1002/2016jD026315</a>               |
|                  | rdb_tmf_muller16      | inorganic gas, NMOC_g                      | Table 2, Table 3                                                                        | <a href="https://doi.org/10.5194/acp-16-3813-2016">doi.org/10.5194/acp-16-3813-2016</a>       |
| Peat             | rdb_p_watson19        | inorganic gas, methane, NMOC_g, PM, NMOC_p | Table 2, Table 3, Table 4                                                               | <a href="https://doi.org/10.5194/acp-19-14173-2019">doi.org/10.5194/acp-19-14173-2019</a>     |
|                  | rdb_p_jayarathne18    | PM, NMOC_p                                 | Table 2, 3.2 Emission of OC, EC and WSOC                                                | <a href="https://doi.org/10.5194/acp-18-2585-2018">doi.org/10.5194/acp-18-2585-2018</a>       |
|                  | rdb_p_roulston18      | PM                                         | Recommended data from 'Discussion and Conclusion'                                       | <a href="https://doi.org/10.1029/2017JD027827">doi.org/10.1029/2017JD027827</a>               |



|                             |                   |                                            |                                                   |                                                                                                     |
|-----------------------------|-------------------|--------------------------------------------|---------------------------------------------------|-----------------------------------------------------------------------------------------------------|
|                             | rdb_p_smith17     | inorganic gas, methane, NMOC_g             | Table 3                                           | <a href="https://doi.org/10.1002/2017GB005709">doi.org/10.1002/2017GB005709</a>                     |
|                             | rdb_p_stockwell16 | inorganic gas, methane, NMOC_g, PM         | Table S2                                          | <a href="https://doi.org/10.5194/acp-16-11711-2016">doi.org/10.5194/acp-16-11711-2016</a>           |
| Crop residue                | rdb_cr_lasko18    | PM                                         | Table 2                                           | <a href="https://doi.org/10.1016/j.envpol.2018.01.098">doi.org/10.1016/j.envpol.2018.01.098</a>     |
|                             | rdb_cr_holder17   | inorganic gas, methane, NMOC_g, PM         | Table 3, Table S5, Table S2, Table S3 and Table 5 | <a href="https://doi.org/10.1016/j.atmosenv.2017.06.043">doi.org/10.1016/j.atmosenv.2017.06.043</a> |
|                             | rdb_cr_liu16      | inorganic gas, NMOC_g, PM                  | Table 3                                           | <a href="https://doi.org/10.1002/2016JD025040">doi.org/10.1002/2016JD025040</a>                     |
| Garbage burning             | rdb_gb_yokelson13 | inorganic gas, methane, NMOC_g, PM         | Table S1                                          | <a href="https://doi.org/10.5194/acp-13-89-2013">doi.org/10.5194/acp-13-89-2013</a>                 |
| Multiple fuel or fire types | rdb_travis23      | inorganic gas, methane, NMOC_g, PM, NMOC_p | Table S1-EFs                                      | <a href="https://doi.org/10.1029/2023JD039309">doi.org/10.1029/2023JD039309</a>                     |
|                             | rdb_fleming18     | inorganic gas, methane, NMOC_g, PM         | Table 1                                           | <a href="https://doi.org/10.5194/acp-18-15169-2018">doi.org/10.5194/acp-18-15169-2018</a>           |
|                             | rdb_goetz18       | PM                                         | Supplement section 3 and 4                        | <a href="https://doi.org/10.5194/acp-18-14653-2018">doi.org/10.5194/acp-18-14653-2018</a>           |
|                             | rdb_jayarathne18  | PM, NMOC_p                                 | Table 2, 3.2 Emission of OC, EC and WSOC          | <a href="https://doi.org/10.5194/acp-18-2585-2018">doi.org/10.5194/acp-18-2585-2018</a>             |
|                             | rdb_koss18        | inorganic gas, NMOC_g                      | S3 Emission Factors                               | <a href="https://doi.org/10.5194/acp-18-3299-2018">doi.org/10.5194/acp-18-3299-2018</a>             |
|                             | rdb_selimovic18   | inorganic gas, methane, NMOC_g, PM         | Table S2                                          | <a href="https://doi.org/10.5194/acp-18-2929-2018">doi.org/10.5194/acp-18-2929-2018</a>             |
|                             | rdb_coffey17      | inorganic gas, PM                          | Table S2                                          | <a href="https://doi.org/10.1021/acs.est.7b02436">doi.org/10.1021/acs.est.7b02436</a>               |

|  |                  |                                    |                                       |                                                                                           |
|--|------------------|------------------------------------|---------------------------------------|-------------------------------------------------------------------------------------------|
|  | rdb_hatch17      | inorganic gas, methane, NMOC_g     | Supplemental Table                    | <a href="https://doi.org/10.5194/acp-17-1471-2017">doi.org/10.5194/acp-17-1471-2017</a>   |
|  | rdb_pokhrel16    | PM                                 | Table S2                              | <a href="https://doi.org/10.5194/acp-16-9549-2016">doi.org/10.5194/acp-16-9549-2016</a>   |
|  | rdb_stockwell16  | inorganic gas, methane, NMOC_g, PM | Table S8, Table S7, Table S9, Table 6 | <a href="https://doi.org/10.5194/acp-16-11043-2016">doi.org/10.5194/acp-16-11043-2016</a> |
|  | rdb_hatch15      | inorganic gas, NMOC_g              | Table S1                              | <a href="https://doi.org/10.5194/acp-15-1865-2015">doi.org/10.5194/acp-15-1865-2015</a>   |
|  | rdb_stockwell15  | inorganic gas, methane, NMOC_g     | Table S2                              | <a href="https://doi.org/10.5194/acp-15-845-2015">doi.org/10.5194/acp-15-845-2015</a>     |
|  | rdb_jayarathne14 | PM                                 | Table 1                               | <a href="https://doi.org/10.1021/es502933j">doi.org/10.1021/es502933j</a>                 |
|  | rdb_may14        | PM                                 | Table 3, Table 4                      | <a href="https://doi.org/10.1002/2014JD021848">doi.org/10.1002/2014JD021848</a>           |

<sup>a</sup>OC = organic carbon, EC = elemental carbon, WSOC = water soluble organic carbon, TC = total carbon, eBC = equivalent black carbon, OBTF = open burn test facility

For laboratory studies in which individual fuels were burned, these fuels were mapped to one of the 14 fuel or fire types as summarized in Table S6. Domestic biomass burning categories were revised from Akagi et al. (2011) and are summarized in Table S7.

| Table S6: Mapping of individual fuels from FLAME-4 and FIREX laboratory studies to fire type. |                                                                                                                                                                                     |
|-----------------------------------------------------------------------------------------------|-------------------------------------------------------------------------------------------------------------------------------------------------------------------------------------|
| Fire or Fuel Type                                                                             | Individual Fuel                                                                                                                                                                     |
| Savanna                                                                                       | savanna grass                                                                                                                                                                       |
| Boreal forest                                                                                 | black spruce                                                                                                                                                                        |
| Temperate forest                                                                              | ponderosa pine, bear grass, ceanothus, Douglas fir, Engelmann spruce, Jeffrey pine, juniper pine, loblolly pine, lodgepole pine, longleaf pine, sagebrush, subalpine fir, wiregrass |
| Chaparral                                                                                     | chamise, manzanita, shrubland                                                                                                                                                       |
| Crop residue                                                                                  | Alfalfa, hay (organic), rice straw, wheat straw, winter wheat, corn, soybean, Kentucky bluegrass, millet (Ghana)                                                                    |

| Table S7: Domestic biomass burning categories. |                              |                       |                  |       |
|------------------------------------------------|------------------------------|-----------------------|------------------|-------|
| Fire Type                                      | Study                        | Cookstove/Fuel        | Measurement Type | MCE   |
| Open cooking                                   | Coffey et al 17              | Three stone with wood | Field            | 0.933 |
|                                                | Akagi_11(Christian et al 10) |                       | Field            | 0.949 |
|                                                | Akagi_11(Roden et al 09)     |                       | Field            | 0.917 |
|                                                | Akagi_11(Johnson et al 08)   |                       | Field            | 0.949 |
|                                                | Akagi_11(Roden et al 06)     |                       | Field            | 0.896 |
|                                                | Akagi_11(Bertschi et al 03)  |                       | Field            | 0.910 |

|              |                                   |                                   |       |       |
|--------------|-----------------------------------|-----------------------------------|-------|-------|
|              | Akagi_11(Zhang et al 00)          |                                   | Field | 0.934 |
|              | Akagi_11(Brocard et al 96)        |                                   | Field | 0.930 |
|              | Stockwell et al                   | Three stone with twig             | Lab   | 0.955 |
|              | Stockwell et al 16                | Three stone with hardwood         | Lab   | 0.955 |
|              | Stockwell et al 15                | Three stone with hardwood         | Lab   | 0.968 |
|              | Akagi_11(Smith et al 00)          |                                   | Lab   | 0.937 |
| Cookstove    | Fleming et al 18                  | Chulha with brushwood             | Field | 0.937 |
|              | Fleming et al 18                  | Chulha with mixed fuel            | Field | 0.892 |
|              | Coffey et al 17                   | Gayapa with wood                  | Field | 0.945 |
|              | Coffey et al 17                   | Philip with wood                  | Field | 0.958 |
|              | Stockwell et al 16                | Mudstove with wood                | Field | 0.933 |
|              | Stockwell et al 16                | Biogas stove                      | Field | 0.999 |
|              | Stockwell et al 16                | Mudstove with wood                | Field | 0.914 |
|              | Akagi_11(Christian et al 10)      | Patsari                           | Field | 0.970 |
|              | Akagi_11(Johnson et al 08)        | Patsari                           | Field | 0.950 |
|              | Stockwell et al 16                | Mudstove with wood                | Lab   | 0.966 |
|              | Stockwell et al 16                | Forced draft stove with wood      | Lab   | 0.975 |
|              | Stockwell et al 16                | Envirotek stove with hardwood     | Lab   | 0.984 |
|              | Stockwell et al 16                | Chimney stove with hardwood       | Lab   | 0.983 |
|              | Stockwell et al 16 (biogas stove) | Biogas stove                      | Lab   | 0.954 |
|              | Stockwell et al 16                | Biobriquette                      | Lab   | 0.985 |
|              | Stockwell et al 15                | Envirofit rocket stove)           | Lab   | 0.975 |
|              | Stockwell et al 15                | Ezystove                          | Lab   | 0.968 |
| Dung burning | Fleming et al 18                  | Chulha with pure dung             | Field | 0.865 |
|              | Fleming et al 18                  | Agithi with pure dung             | Field | 0.819 |
|              | Stockwell et al 16                | Mudstove with dung ,hardwood      | Field | 0.912 |
|              | Stockwell et al 16                | Open burning with dung            | Field | 0.876 |
|              | Stockwell et al 16                | Mudstove with pure dung           | Field | 0.908 |
|              | Akagi_11(Christian et al 07)      |                                   | Field | 0.836 |
|              | Koss et al 18                     | Open burning with dung            | Lab   | 0.899 |
|              | Selimovic et al 18                | Open burning with dung            | Lab   | 0.899 |
|              | Stockwell et al 16                | Chimney stove with dung, hardwood | Lab   | 0.965 |
|              | Stockwell et al 16                | Mudstove with dung, twig          | Lab   | 0.980 |
|              | Stockwell et al 16                | Three stone with dung             | Lab   | 0.964 |

|                  |                             |                                     |       |       |
|------------------|-----------------------------|-------------------------------------|-------|-------|
|                  | Stockwell et al 16          | Mudstove with dung                  | Lab   | 0.956 |
|                  | Stockwell et al 16          | Envirotek stove with dung, hardwood | Lab   | 0.971 |
|                  | Stockwell et al 16          | Chimney stove with dung, twig       | Lab   | 0.957 |
|                  | Stockwell et al 16          | Mudstove with dung, hardwood        | Lab   | 0.976 |
|                  | Akagi_11(Keene et al 06)    |                                     | Lab   | 0.844 |
| Charcoal burning | Coffey et al 17             | Philip with charcoal                | Field | 0.939 |
|                  | Coffey et al 17             | Coalpot with charcoal               | Field | 0.880 |
|                  | Stockwell et al 16          | Clamp kiln                          | Field | 0.950 |
|                  | Stockwell et al 16          | Zigzag kiln                         | Field | 0.994 |
|                  | Stockwell et al 16          | Zigzag kiln with stoke holes        | Field | 0.861 |
|                  | Akagi_11(Bertschi et al 03) |                                     | Field | 0.919 |
|                  | Akagi_11(Kituyi et al 01)   |                                     | Field | 0.927 |
|                  | Akagi_11(Brocard et al 98)  |                                     | Field | 0.866 |
|                  | Stockwell et al 16          | Forced draft stove                  | Lab   | 0.929 |
|                  | Akagi_11(Smith et al 00)    |                                     | Lab   | 0.848 |

## S2. Primary Database

The data tables from the legacy and raw databases were reformatted to achieve a consistent structure that allowed combining the data into a single database, referred to as the NEIVA primary database (pdb). Data processing steps, described below, were performed on the legacy and raw databases prior to inclusion in the primary database. The resultant NEIVA primary database consists of 44 tables listed in Table S8.

| Table S8: Tables comprising the primary database (pdb). |                                 |                 |
|---------------------------------------------------------|---------------------------------|-----------------|
| Fire Type                                               | Table Name                      | Source          |
| savanna                                                 | pdb_akagi11_savanna             | legacy DB (ldb) |
| boreal forest                                           | pdb_akagi11_boreal_forest       | legacy DB (ldb) |
| tropical forest                                         | pdb_akagi11_tropical_forest     | legacy DB (ldb) |
| temperate forest                                        | pdb_akagi11_temperate_forest    | legacy DB (ldb) |
| peat                                                    | pdb_akagi11_peat                | legacy DB (ldb) |
| chaparral                                               | pdb_akagi11_chaparral           | legacy DB (ldb) |
| open cooking                                            | pdb_akagi11_open_cooking        | legacy DB (ldb) |
| cookstove                                               | pdb_akagi11_cookstove           | legacy DB (ldb) |
| dung burning                                            | pdb_akagi11_dung_burning        | legacy DB (ldb) |
| charcoal making                                         | pdb_akagi11_charcoal_making     | legacy DB (ldb) |
| charcoal burning                                        | pdb_akagi11_charcoal_burning    | legacy DB (ldb) |
| pasture maintenance                                     | pdb_akagi11_pasture_maintenance | legacy DB (ldb) |
| crop residue                                            | pdb_akagi11_crop_residue        | legacy DB (ldb) |
| garbage burning                                         | pdb_akagi11_garbage_burning     | legacy DB (ldb) |
| savanna                                                 | pdb_sv_desservettaz20           | raw DB (rdb)    |

|                     |                     |              |
|---------------------|---------------------|--------------|
| boreal forest       | pdb_bf_hayden22     | raw DB (rdb) |
| tropical forest     | pdb_trf_hodgson18   | raw DB (rdb) |
| temperate forest    | pdb_tmf_gkatzelis23 | raw DB (rdb) |
| temperate forest    | pdb_tmf_permar21    | raw DB (rdb) |
| temperate forest    | pdb_tmf_liu17       | raw DB (rdb) |
| temperate forest    | pdb_tmf_muller16    | raw DB (rdb) |
| peat                | pdb_p_watson19      | raw DB (rdb) |
| peat                | pdb_p_jayarathne18  | raw DB (rdb) |
| peat                | pdb_p_roulston18    | raw DB (rdb) |
| peat                | pdb_p_smith17       | raw DB (rdb) |
| peat                | pdb_p_stockwell16   | raw DB (rdb) |
| crop residue        | pdb_cr_lasko18      | raw DB (rdb) |
| crop residue        | pdb_cr_holder17     | raw DB (rdb) |
| crop residue        | pdb_cr_liu16        | raw DB (rdb) |
| garbage burning     | pdb_gb_yokelson13   | raw DB (rdb) |
| multiple fire types | pdb_travis23        | raw DB (rdb) |
| multiple fire types | pdb_fleming18       | raw DB (rdb) |
| multiple fire types | pdb_goetz18         | raw DB (rdb) |
| multiple fire types | pdb_jayarathne18    | raw DB (rdb) |
| multiple fire types | pdb_koss18          | raw DB (rdb) |
| multiple fire types | pdb_selimovic18     | raw DB (rdb) |
| multiple fire types | pdb_coffey17        | raw DB (rdb) |
| multiple fire types | pdb_hatch17         | raw DB (rdb) |
| multiple fire types | pdb_pokhrel16       | raw DB (rdb) |
| multiple fire types | pdb_stockwell16     | raw DB (rdb) |
| multiple fire types | pdb_hatch15         | raw DB (rdb) |
| multiple fire types | pdb_stockwell15     | raw DB (rdb) |
| multiple fire types | pdb_jayarathne14    | raw DB (rdb) |
| multiple fire types | pdb_may14           | raw DB (rdb) |

#### Data processing for legacy database:

- The legacy database includes EFs and uncertainty from Akagi et al. (2011). The uncertainty columns were not included in the primary database and were not used for calculating averages.
- The ‘akagi11\_temperate\_forest’ table included EFs from Radke et al. (1991) that were based on field measurements or estimates when field data were not available. The estimates, an 80/10/10 weighted average of pine-forest understory, coniferous canopy, and organic soil reported by Yokelson et al. (2013) were not included in the primary database.
- The ‘akagi11\_temperate\_forest’ and ‘akagi11\_chaparral’ tables include EFs for unknown PIT masses. These unknowns were not retained in the primary database.
- The ‘akagi11\_temperate\_forest’ and ‘akagi11\_chaparral’ tables included isomers as separate compounds; for example, ‘Other C6H10 (isomer\_1)’ and ‘Other C6H10

(isomer\_2)'. In the primary database isomers were combined, renamed (e.g., 'C6H10 isomers'), and the EFs summed over all isomers.

- The 'akagi11\_peat' table in the legacy database includes peatland data from Yokelson et al. (1997) and Christian et al. (2003). Because peatland typically includes peat soil and the overlaying vegetation, only the peat data were retained in the primary database, thus omitting the peatland data and use of the "peatland" descriptor.
- Two conventions are common for reporting charcoal-making EFs: grams per kg of wood used and grams per kg of charcoal made, where a kg of wood typically yields about 280 g of charcoal (Bertschi et al., 2003). In Tables 2 and S9 of Akagi et al. (2011), the factor to convert g/kg-wood to g/kg-charcoal-made (~3.57) was applied to all the gases when needed, but inadvertently omitted for EC and OC. That oversight has been corrected in the pdb.

#### Data processing for raw database:

- For studies in which multiple fires of the same type were sampled, only the average was retained in the primary database. For example, the 'rdb\_p\_stockwell16' table has EF data for 35 peat fire samples and only the average EF of those 35 samples was retained in the pdb.
- In the 'rdb\_stockwell15' table, zeros were added for peat nitrogen oxide (NO), nitrogen dioxide (NO<sub>2</sub>), nitrous acid (HONO), and sulfur dioxide (SO<sub>2</sub>) measurements that were below the detection limit (in 4-5 of 6 peat stack burns depending on the constituent) and the zeros were used to calculate the average EFs for those constituents in the pdb for peat from Stockwell et al. (2015).
- From the 'rdb\_hatch17' table, only the WAS data were retained in the primary database since the other EF data were included in 'hatch15' or 'stockwell15'.
- The 'rdb\_hatch15' table included isomers as separate compounds. If isomers belonged to the same functional group type, in the primary database they were combined, renamed, and the EF was summed over all isomers. If they belonged to different functional group types, they remained separate. For example, a 'C11H16 isomer' of type "aliphatics" and of type "aromatics-0 DBE" would be represented separately (2 rows) in the primary database: 'C11H16 isomers', one with VOC type 'aliphatics-other' and the other with VOC type 'aromatics- 0 DBE' (where DBE = double bond equivalent).
- The units of PM<sub>2.5</sub> and OC from 'rdb\_p\_jayarathne18' were converted from mg/g to g/kg before inclusion in the primary database. Similarly, the weight percent of PM<sub>2.5</sub> and OC in mg/g in 'jayarathne18\_n' were converted to g/kg before being retained in the primary database.
- To avoid double counting, the EF data for elemental carbon (EC) was dropped from the 'pdb\_p\_jayarathne18' dataset because the same EF data for EC was reported in 'pdb\_p\_stockwell16'.
- EFs for gaseous NMOCs measured during FIREX and reported by Koss et al. (2018) were calculated assuming 50 % carbon for all samples. Prior to their inclusion in the primary database, the EFs were multiplied by a fuel-dependent correction factor to reflect the actual % carbon reported by Selimovic et al. (2018). The % C correction factors, summarized in Table S9, were derived by taking the ratio of the measured % C/assumed % C (50) averaged for each fuel type.

| Table S9: Average EFs based on Koss et al. (2018) and % C correction factor applied to account for actual % C reported by Selimovic et al. (2018). |                       |
|----------------------------------------------------------------------------------------------------------------------------------------------------|-----------------------|
| Average EF                                                                                                                                         | % C correction factor |
| EF_engelmann_spruce_koss18                                                                                                                         | 0.95                  |
| EF_jeffrey_pine_koss18                                                                                                                             | 0.98                  |
| EF_sagebrush_koss18                                                                                                                                | 0.93                  |
| EF_manzanita_uncontaminated_koss18                                                                                                                 | 0.96                  |
| EF_manzanita_contaminated_koss18                                                                                                                   | 0.96                  |
| EF_bear_grass_koss18                                                                                                                               | 0.92                  |
| EF_rice_straw_koss18                                                                                                                               | 0.79                  |
| EF_peat_koss18                                                                                                                                     | 1.14                  |
| EF_dung_koss18                                                                                                                                     | 0.75                  |
| EF_excelsior_koss18                                                                                                                                | 0.97                  |
| EF_akagill_crop_residue_yokelson11                                                                                                                 | 0.90                  |

### S3. Integrated EF Dataset

The study-averaged EF data aggregated in the NEIVA primary database were merged into a single dataset, the NEIVA integrated EF dataset, which consists of a single EF table for all fuel and fire types with the columns as listed in Table S10. The multistep process for merging the EF data is described below.

| Table S10: Columns of the NEIVA integrated dataset. |                                                                                                                                                                                                          |
|-----------------------------------------------------|----------------------------------------------------------------------------------------------------------------------------------------------------------------------------------------------------------|
| Column name                                         | Description                                                                                                                                                                                              |
| mm                                                  | Molar mass                                                                                                                                                                                               |
| formula                                             | Chemical formula                                                                                                                                                                                         |
| compound                                            | Chemical compound name                                                                                                                                                                                   |
| pollutant_category                                  | Categorizes the type of pollutant as either inorganic gas, methane, gaseous non-methane organic compound (NMOC_g), particulate non-methane organic compound (NMOC_p), or particulate matter (PM).        |
| EF                                                  | Columns imported from the legacy database are prefixed with 'EF_akagill_'. Columns imported from the raw database follow the general format 'EF_[Fuel Type]_[Study]'; e.g., 'EF_ponderosa_pine_hatch15'. |
| id                                                  | Unique identifier assigned in the development of NEIVA                                                                                                                                                   |

The primary database tables were merged into a single table using a hierarchical process based on the unique ids assigned in this work and executed using a Python script. First, compounds or groups of compounds with matching 'id' and with unmatching 'id' were identified across the tables in the primary database. Second, for matched ids EF columns were appended to a merged table (indicating additional EFs), while for unmatched id rows were appended (indicating a new compound). This two-step process was applied iteratively to each of the pdb tables to create a single merged table.

One of the limitations in the above approach is that grouped compounds of the same compound class but with different names were identified as unique compound classes, leading to double counting in subsequent calculations. To resolve this, after the two-step process, additional logical conditions were applied. Specifically, all chemical formulas that had more than one id based on

exact/protonated mass or retention time were flagged. This resulted in 60 flagged groups of compounds. A subset of the flagged compounds is shown in Table S11. Rows with the same formula and equivalent ids were combined into a single row in the merged table (EF columns for each entry appended). The compound name with the longest string was chosen as the representative name and its id was adopted for that row in the merged table. Table S12 illustrates the results of these combinations for the subset of compounds in Table S11. The number of NMOC\_g compounds (rows in the table) pre and post this additional refinement is listed in Table S13.

After the final merge, compounds were sorted. Gaseous compounds ('NMOC\_g', 'inorganic gas', 'methane') were arranged in ascending order by molar mass. Particulate compounds were arranged with total PM followed by PM constituents (e.g., OC, EC, BC, NMOC\_p and optical property). In the final integrated EF dataset, the compounds were ordered with methane followed by inorganic gas, then NMOC\_g, and finally PM (including PM constituents). The integrated EF dataset has a total of 1311 rows (i.e., compounds or constituents) and 263 columns (i.e., individual EFs). In other words, EFs are available for a total of 1311 compounds or constituents with up to 263 individual or study-averaged measurements across the 14 major fuel and fire types.

| Table S11: A subset of the integrated EF dataset that represents groups of compounds with equivalent ids but different names. |                                                |                           |                                                                                                                                                    |
|-------------------------------------------------------------------------------------------------------------------------------|------------------------------------------------|---------------------------|----------------------------------------------------------------------------------------------------------------------------------------------------|
| Formula                                                                                                                       | Compound Name                                  | ID                        | Source Table in PDB                                                                                                                                |
| C10H16                                                                                                                        | Monoterpenes                                   | 136.12416000000002_C10H16 | pdb_tmf_permar21,<br>pdb_koss18,<br>pdb_tmf_liu17,<br>pdb_akagi11_temperate_forest<br>pdb_akagi11_chaparral                                        |
| C10H16                                                                                                                        | Terpenes                                       | 136.124677_C10H16         | pdb_tmf_gkatzelis23,<br>pdb_travis23,<br>pdb_bf_hayden22,<br>pdb_stockwell15                                                                       |
| C7H8O                                                                                                                         | Cresols(Methoxyphenols)                        | 108.056991_C7H8O          | pdb_stockwell15                                                                                                                                    |
| C7H8O                                                                                                                         | 2-Methylphenol (=o-cresol) + anisol            | 108.05716_C7H8O           | pdb_tmf_gkatzelis23,<br>pdb_travis23,<br>pdb_bf_hayden22,<br>pdb_tmf_permar21,<br>pdb_koss18,                                                      |
| C8H10                                                                                                                         | C8 Aromatics                                   | 106.077687_C8H10          | pdb_bf_hayden22,<br>pdb_akagi11_temperate_forest                                                                                                   |
| C8H10                                                                                                                         | Ethyl benzene + m-xylene + p-xylene + o-xylene | 106.07816_C8H10           | pdb_tmf_gkatzelis23,<br>pdb_koss18,<br>pdb_stockwell15,<br>pdb_akagi11_savanna,<br>pdb_akagi11_tropical_forest,<br>pdb_akagi11_pasture_maintenance |
| C8H10                                                                                                                         | C8 Aromatics                                   | 106.07825_C8H10           | pdb_tmf_permar21                                                                                                                                   |



|       |            |                     |                                                                                                                                                                                                                                                                                                                                                                                      |
|-------|------------|---------------------|--------------------------------------------------------------------------------------------------------------------------------------------------------------------------------------------------------------------------------------------------------------------------------------------------------------------------------------------------------------------------------------|
| C8H10 | m+p-xylene | 106.078250319_C8H10 | <p>           pdb_travis23,<br/>           pdb_tmf_permar21,<br/>           pdb_fleming18,<br/>           pdb_holder17,<br/>           pdb_hatch17,<br/>           pdb_tmf_liu17,<br/>           pdb_stockwell16,<br/>           pdb_hatch15,<br/>           pdb_akagi11_boreal_forest<br/>           pdb_akagi11_temperate_forest<br/>           pdb_akagi11_chaparral         </p> |
|-------|------------|---------------------|--------------------------------------------------------------------------------------------------------------------------------------------------------------------------------------------------------------------------------------------------------------------------------------------------------------------------------------------------------------------------------------|

Table 12: The subset of grouped compounds from Table S11 after non-unique groups of compounds were combined as described in text.

| Formula | Compound Name                                  | ID                        | Source Table in PDB                                                                                                                                                                                                                                                                                                                                                                                                                                                                                                                                                                                                   |
|---------|------------------------------------------------|---------------------------|-----------------------------------------------------------------------------------------------------------------------------------------------------------------------------------------------------------------------------------------------------------------------------------------------------------------------------------------------------------------------------------------------------------------------------------------------------------------------------------------------------------------------------------------------------------------------------------------------------------------------|
| C10H16  | Monoterpenes                                   | 136.12416000000002_C10H16 | <p>           pdb_tmf_gkatzelis23,<br/>           pdb_travis23,<br/>           pdb_bf_hayden22,<br/>           pdb_tmf_permar21,<br/>           pdb_koss18,<br/>           pdb_tmf_liu17,<br/>           pdb_stockwell15<br/>           pdb_akagi11_temperate_forest<br/>           pdb_akagi11_chaparral         </p>                                                                                                                                                                                                                                                                                                |
| C7H8O   | 2-Methylphenol (=o-cresol) + anisol            | 108.05716_C7H8O           | <p>           pdb_tmf_gkatzelis23,<br/>           pdb_travis23,<br/>           pdb_bf_hayden22,<br/>           pdb_tmf_permar21,<br/>           pdb_koss18,<br/>           pdb_stockwell15         </p>                                                                                                                                                                                                                                                                                                                                                                                                               |
| C8H10   | Ethyl benzene + m-xylene + p-xylene + o-xylene | 106.07816_C8H10           | <p>           pdb_tmf_gkatzelis23<br/>           pdb_travis23,<br/>           pdb_bf_hayden22,<br/>           pdb_tmf_permar21,<br/>           pdb_fleming18,<br/>           pdb_koss18,<br/>           pdb_hatch17,<br/>           pdb_holder17,<br/>           pdb_stockwell16,<br/>           pdb_stockwell15<br/>           pdb_hatch15,<br/>           pdb_akagi11_savanna,<br/>           pdb_akagi11_boreal_forest,<br/>           pdb_akagi11_tropical_forest,<br/>           pdb_akagi11_temperate_forest,<br/>           pdb_akagi11_chaparral,<br/>           pdb_akagi11_pasture_maintenance         </p> |

| Table S13: The size of the integrated EF dataset through the integration steps.                                         |                       |                           |
|-------------------------------------------------------------------------------------------------------------------------|-----------------------|---------------------------|
| Dataset                                                                                                                 | Size (columns x rows) | Number of Unique Formulas |
| Initial integrated NMOC_g table, combination of all pdb tables using id column.                                         | 255 x 1189            | 591                       |
| Refined integrated NMOC_g table, after combination of non-unique groups of compounds.                                   | 255 x 1115            | 591                       |
| Final integrated EF table that includes inorganic gas, methane, NMOC_g, NMOC_p, and PM EFs for all fire and fuel types. | 255 x 1296            | 708                       |

#### S4. Processed EF Dataset

Two significant data processing steps were performed using the integrated EF dataset prior to calculating the averages for the recommended EF dataset. Laboratory-based EFs were adjusted to account for known differences in laboratory and field combustion conditions and isomer distributions were assigned to grouped compounds where applicable. Each of these steps are described in detail below and the resultant EFs are stored in the processed EF dataset, a single table for all EFs across all 14 fuel and fire types.

##### Laboratory-Based EF Adjustment

The laboratory-based EF data for all fuels, with the exception of peat, were adjusted to account for known differences in modified combustion efficiency (MCE) between laboratory and field studies. Specifically, MCE in laboratory burns is typically higher than in field measurements. Previous studies have described and applied methods for adjusting laboratory-derived EFs (e.g., Christian et al., 2003, Yokelson et al., 2008, Selimovic et al., 2018). Most commonly, laboratory EFs for individual compounds or classes of compounds are plotted as a function of MCE and the data are fit using linear regression; the slope and intercept of the linear fit allows calculation of a field-adjusted EF based on the field-derived MCE. This method requires having enough data points for each compound or class of compounds to obtain a robust linear regression.

Here, a modified approach was applied using emission ratios (ERs) to CO (smoldering-dominant compounds) and CO<sub>2</sub> (flaming-dominant compounds). For each study, the average EF was calculated for all fuels mapped to a single fuel or fire type. For example, the pdb\_koss18 table includes EFs for individual fuels such as ponderosa pine, Engelmann spruce, chamise, and peat. For fuels that were mapped to temperate forest (e.g., ponderosa pine, Engelmann spruce, see Table S6) the calculated average was stored in the processed EF dataset with the column name 'EF\_temperate\_forest\_koss18'. Averaging across fuels mapped to a specific fire type provides a better representation of mixed fuels encountered in the field. For each gaseous compound (*i*) in each study, the average ER was then calculated relative to the study-average CO for smoldering-dominant compounds and CO<sub>2</sub> for flaming-dominant compounds. The laboratory-based study-averaged ER was then multiplied by the field-averaged EF\_CO to calculate a laboratory-adjusted EF as follows for smoldering-dominant compounds:

$$EF_{i\_lab\_adj} = (EF_{i\_lab\_ave}/EF_{CO\_lab\_ave}) * EF_{CO\_field\_ave}$$

and by the field-averaged EF\_CO<sub>2</sub> for flaming-dominant compounds:

$$EF_{i\_lab\_adj} = (EF_{i\_lab\_ave}/EF_{CO_2\_lab\_ave}) * EF_{CO_2\_field\_ave}$$

Table S14 summarizes the data used in the laboratory-based EF adjustment and the MCE values pre- and post-EF adjustment (see also Figure 1 and Figure S2).

| Table S14: Reference publications used in the emission factor adjustment. |                                                |                  |                    |                     |
|---------------------------------------------------------------------------|------------------------------------------------|------------------|--------------------|---------------------|
| Fire Type                                                                 | Study                                          | Measurement Type | MCE Pre-adjustment | MCE Post-adjustment |
| Savanna                                                                   | Desservettaz et al. 20                         | Field            | 0.899              |                     |
|                                                                           | Akagi_11(Yokelson et al. 11)                   | Field            | 0.930              |                     |
|                                                                           | Akagi_11(Yokelson et al. 03)                   | Field            | 0.938              |                     |
|                                                                           | Akagi_11(Sinha et al. 03)                      | Field            | 0.941              |                     |
|                                                                           | Akagi_11(Ferek et al. 98)                      | Field            | 0.962              |                     |
|                                                                           | Travis et al. 23                               | Lab              | 0.895              | 0.934               |
|                                                                           | Stockwell et al. 15                            | Lab              | 0.958              | 0.934               |
|                                                                           | Akagi_11(Christian et al. 03)                  | Lab              | 0.953              | 0.934               |
| Boreal forest                                                             | Hayden et al. 22                               | Field            | 0.891              |                     |
|                                                                           | Akagi_11(Simpson et al. 11)                    | Field            | 0.901              |                     |
|                                                                           | Akagi_11(Goode et al. 00)                      | Field            | 0.921              |                     |
|                                                                           | Akagi_11(Nance et al. 93)                      | Field            | 0.928              |                     |
|                                                                           | Akagi_11(Radke et al. 91)                      | Field            | 0.911              |                     |
|                                                                           | Hatch et al. 17                                | Lab              | 0.937              | 0.911               |
|                                                                           | Hatch et al. 15                                | Lab              | 0.937              | 0.911               |
|                                                                           | Stockwell et al. 15                            | Lab              | 0.959              | 0.911               |
|                                                                           | Akagi_11(Burling et al. 10)                    | Lab              | 0.827              | 0.911               |
|                                                                           | Akagi_11(Bertschi et al. 03)                   | Lab              | 0.874              | 0.911               |
|                                                                           | Akagi_11(Yokelson et al. 97)                   | Lab              | 0.821              | 0.911               |
|                                                                           |                                                |                  |                    |                     |
| Temperate forest                                                          | Gkatzelis et al. 23                            | Field            | 0.899              |                     |
|                                                                           | Permar et al. 21                               | Field            | 0.901              |                     |
|                                                                           | Liu et al. 17                                  | Field            | 0.912              |                     |
|                                                                           | Muller et al. 16                               | Field            |                    |                     |
|                                                                           | Akagi_11(Yokelson et al. 13) organic soil      | Field            | 0.850              |                     |
|                                                                           | Akagi_11(Yokelson et al. 13) coniferous canopy | Field            | 0.926              |                     |
|                                                                           | Akagi_11(Akagi et al. 13)                      | Field            | 0.931              |                     |
|                                                                           | Akagi_11(Yokelson et al. 13)                   | Field            | 0.936              |                     |
|                                                                           | Akagi_11(Yokelson et al. 11)                   | Field            | 0.908              |                     |
|                                                                           | Akagi_11(Radke et al. 91) debris               | Field            | 0.927              |                     |

|                 |                                              |       |       |       |
|-----------------|----------------------------------------------|-------|-------|-------|
|                 | Akagi_11(Radke et al. 91) temperate wildfire | Field | 0.914 |       |
|                 | Travis et al. 23                             | Lab   | 0.914 | 0.912 |
|                 | Selimovic et al. 18                          | lab   | 0.92  | 0.912 |
|                 | Koss et al. 18                               | lab   | 0.926 | 0.912 |
|                 | Hatch et al. 17                              | lab   | 0.927 | 0.912 |
|                 | Hatch et al. 15                              | lab   | 0.927 | 0.912 |
|                 | Stockwell et al. 15                          | lab   | 0.948 | 0.912 |
| Chaparral       | Akagi_11(Yokelson et al. 13)                 | field | 0.935 |       |
|                 | Akagi_11(Radke et al. 91)                    | field | 0.946 |       |
|                 | Travis et al. 23                             | lab   | 0.939 | 0.941 |
|                 | Koss et al. 18                               | lab   | 0.958 | 0.941 |
|                 | Selimovic et al. 18                          | lab   | 0.958 | 0.941 |
|                 | Stockwell et al. 15                          | lab   | 0.929 | 0.941 |
| Crop residue    | Holder et al. 17                             | field | 0.951 |       |
|                 | Liu et al. 16                                | field | 0.93  |       |
|                 | Stockwell et al. 16                          | field | 0.952 |       |
|                 | Akagi_11(Yokelson et al. 11)                 | field | 0.925 |       |
|                 | Travis et al. 23                             | lab   | 0.929 | 0.946 |
|                 | Koss et al. 18                               | lab   | 0.953 | 0.946 |
|                 | Selimovic et al. 18                          | lab   | 0.953 | 0.946 |
|                 | Hatch et al. 17                              | lab   | 0.942 | 0.946 |
|                 | Hatch et al. 15                              | lab   | 0.942 | 0.946 |
|                 | Stockwell et al. 15                          | lab   | 0.941 | 0.946 |
|                 | Akagi_11(Christian et al. 03)                | lab   | 0.811 | 0.946 |
|                 |                                              |       |       |       |
| Garbage burning | Stockwell et al. 16                          | field | 0.923 |       |
|                 | Akagi_11(Yokelson et al. 11)                 | field | 0.974 |       |
|                 | Akagi_11(Christian et al. 10)                | field | 0.951 |       |
|                 | Stockwell et al. 15                          | lab   | 0.973 | 0.948 |
|                 | Yokelson et al. 13                           | lab   | 0.967 | 0.948 |

The results of the laboratory-based EF adjustment are further explored and evaluated in Figures S2-S5 below, in which the magnitude of the EF adjustment for flaming-dominant compounds is shown (Figure S2), and comparisons are made between calculated averages using laboratory data only, field data only, and the average of laboratory-corrected and field data, with published EFs from recent field studies.

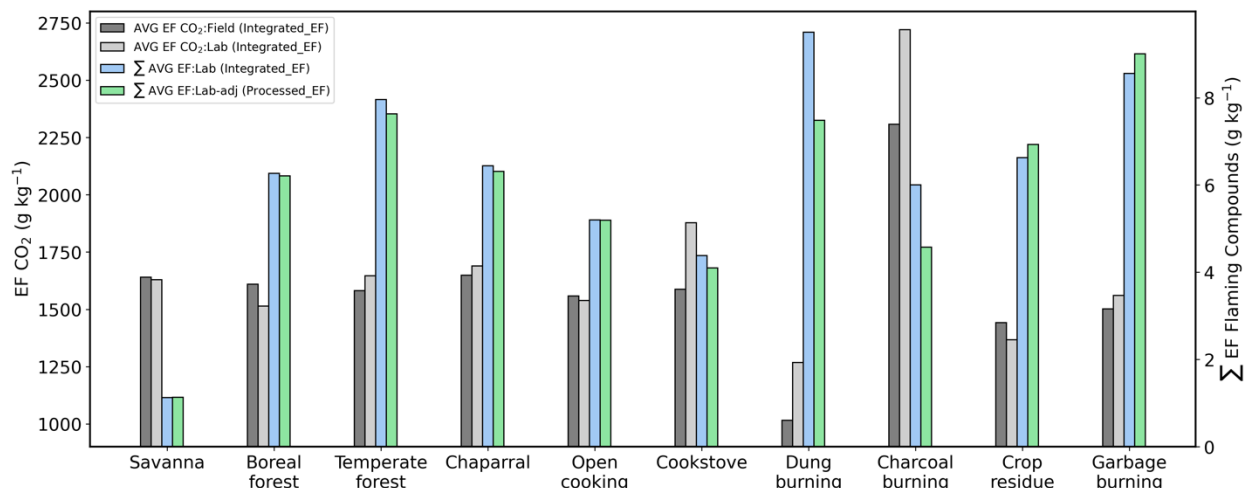

**Figure S2: Averaged EF values for CO<sub>2</sub> (field, dark grey; lab, light grey) and the sum of flaming dominant compounds (excluding CO<sub>2</sub>) pre-(blue) and post-(green) adjustment to account for differences in combustion conditions between laboratory and field.**

Figure S2 illustrates the magnitude of the adjustment to laboratory-based EFs for flaming dominant compounds (NO, NO<sub>2</sub>, NO<sub>x</sub> as NO, N<sub>2</sub>O, HONO, SO<sub>2</sub>, HCl, gaseous Hg). For each fuel or fire type, the average field-based EF for CO<sub>2</sub> is shown in dark grey and the laboratory-based EF for CO<sub>2</sub> in light grey. The laboratory-based CO<sub>2</sub> values are higher for temperate forest, chaparral, domestic bb (cookstove, dung, charcoal), and garbage burning. The sum of the adjusted EFs for the flaming-dominant compounds decreases for those fuel and fire types, with the exception of garbage burning, to account for the higher EF values measured under more flaming conditions in the laboratory studies. For two fire types, boreal forest and garbage burning the sum of the adjusted EFs does not increase and decrease (respectively) as expected. This is likely because the natural variability (driven by fuel and fire characteristics) is larger than the small difference between the average field and laboratory EF<sub>CO<sub>2</sub></sub>.

The adjusted laboratory-based EFs replace the unadjusted laboratory-based EFs in the processed EF dataset and are used in the calculation of the recommended EFs. To more closely evaluate this adjustment on an individual compound level, Figures S3-S5 show the distribution of field and adjusted laboratory EFs (box and whiskers) for the 25 compounds with the highest number of observations (“n”) in the NEIVA integrated EF database for the temperate forest fire type (Fig. S3), the corresponding figure for the crop residue fire type (Fig. S4), and the 25 most abundant NMOC<sub>g</sub> in the crop residue fire type not shown in Fig. S4 (Fig. S5).

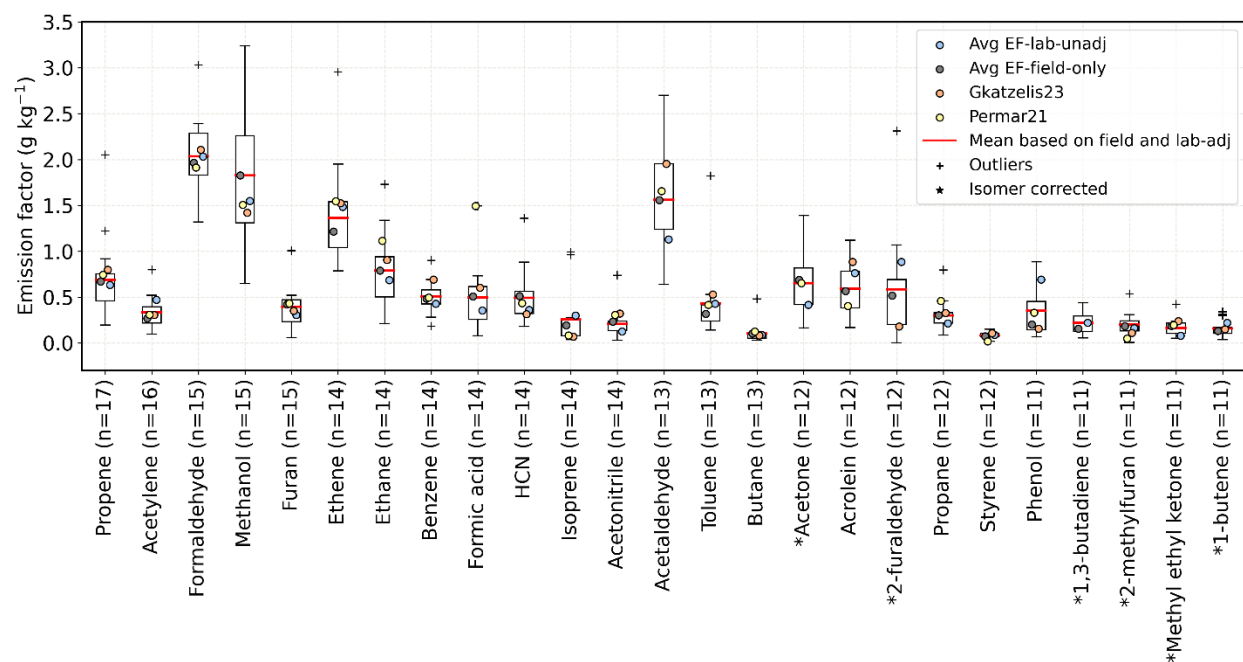

**Figure S3: The NMOG\_g EFs with the highest n (excluding compounds shown in Fig. 3) for temperate forest. The box and whiskers represent the values in the processed EF dataset and thus include the adjusted laboratory EFs. The red line indicates the mean value and is equivalent to the recommended EF. The stars represent outliers. Compounds marked with an asterisk have had an additional correction, application of isomeric distributions described below. The number of observations is listed in parenthesis (“n”).**

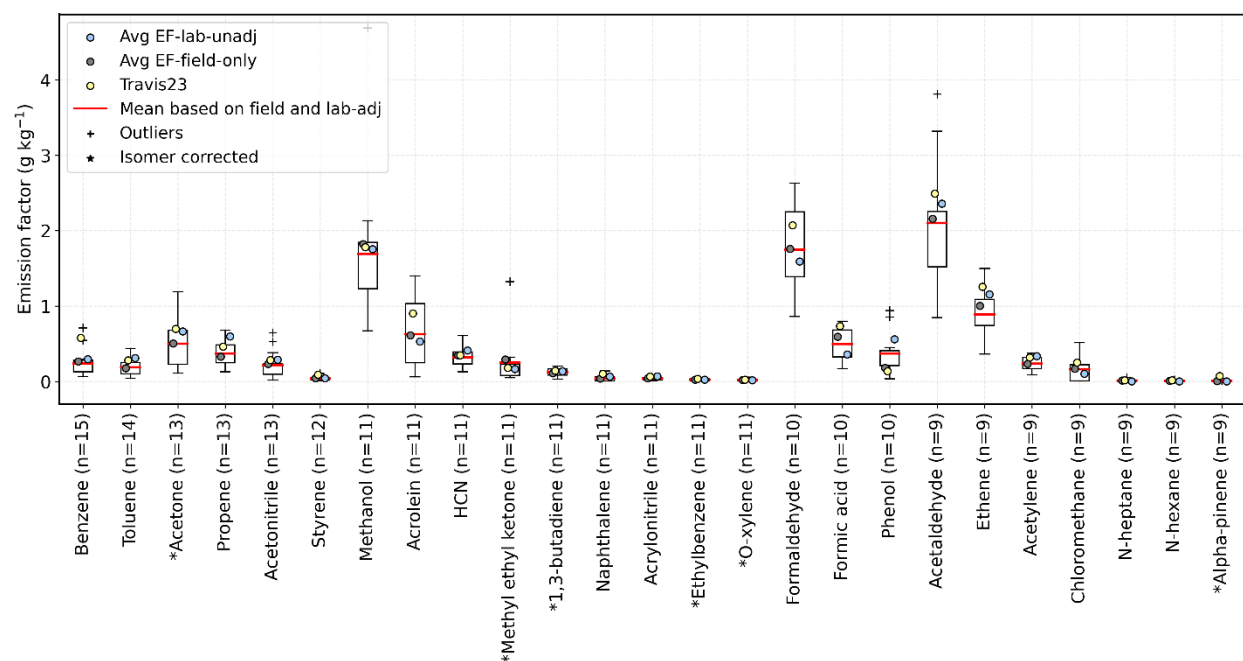

**Figure S4: The NMOG\_g EFs with the highest n (excluding compounds shown in Fig. S5) for crop residue. The box and whiskers represent the values in the processed EF dataset and thus include the adjusted laboratory EFs. The red line indicates the mean value and is equivalent to the recommended EF. The stars represent outliers. Compounds marked with an asterisk have had an additional correction, application of isomeric distributions described below. The number of observations is listed in parenthesis (“n”).**

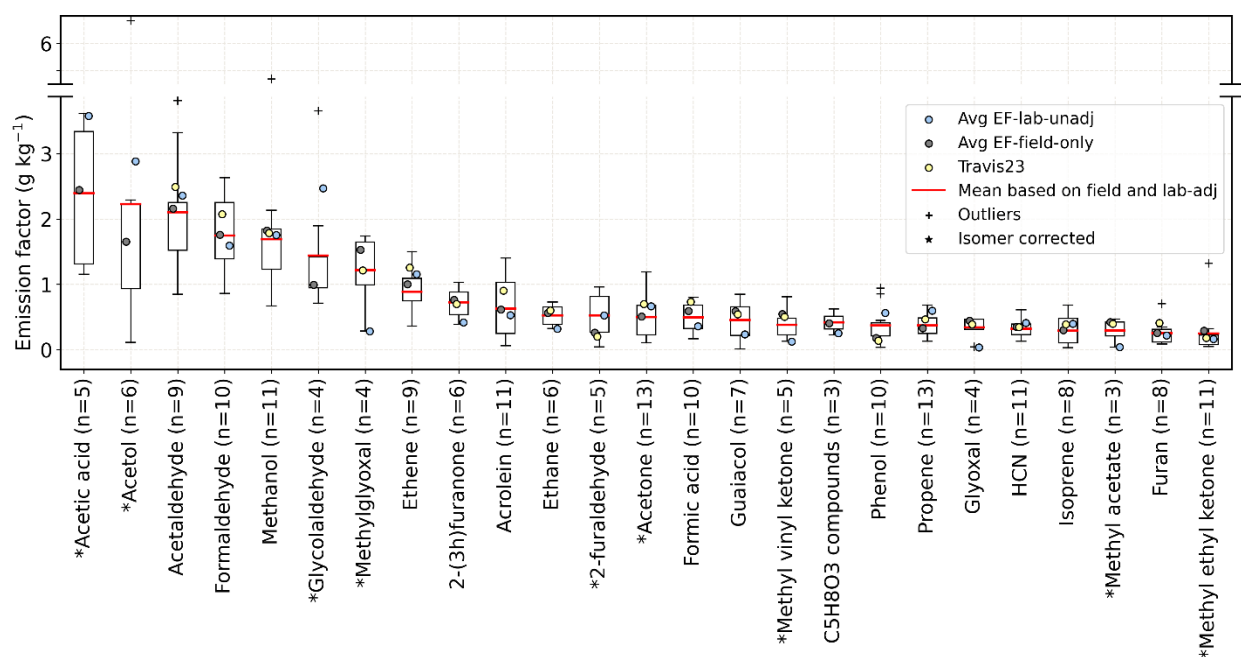

**Figure S5: The 25 most abundant NMOC<sub>g</sub> EFs for crop residue.** The box and whiskers represent the values in the processed EF dataset and thus include the adjusted laboratory EFs. The red line indicates the mean value and is equivalent to the recommended EF. The stars represent outliers. Compounds marked with an asterisk have had an additional correction, application of isomeric distributions described below. The number of observations is listed in parenthesis (“n”).

### Assignment of Fractional Contributions to Grouped Non-Methane Organic Compounds

For the NMOC<sub>g</sub> in the integrated EF dataset, which represent the 14 fuel and fire types, speciated EF data were used to assign fractional contributions to compounds that could not be differentiated using the published method of detection. In general, if the sum of individual reported EFs was within  $2.5 \times$  the EF for the grouped compounds (i.e.,  $\text{sum individual EFs} = 0.4\text{--}2.5 \times \text{grouped EF}$ ) in a given fuel or fire type, then the speciated EFs were used to assign fractional contributions to the grouped compounds. The only criteria used were the fuel or fire type and the EF range, thus the assignments were not restricted to e.g., samples collected from the same laboratory experiment or same fire plume. After applying the fractional contributions, the EF of the grouped compounds was removed from the dataset. If the sum of the individual reported compounds was outside  $2.5 \times$  the EF for the grouped compound (i.e.,  $\text{sum individual EFs} = <0.4$  or  $>2.5 \times \text{grouped EFs}$ ), the grouped compounds were retained as a single compound in the recommended EF database. This process minimizes double counting of NMOCs<sub>g</sub> and allows better representation of the chemistry of individual compounds. To illustrate, in the integrated EF dataset the following results appear for “C<sub>4</sub>H<sub>6</sub>O” in a given fuel type. The first AVG column represents the average of all EFs included in the integrated EF dataset for that compound/group of compounds for that fuel or fire type. Note that this average is not weighted by the number of studies or measurements.

| Formula                         | Compound                                            | AVG EF |
|---------------------------------|-----------------------------------------------------|--------|
| C <sub>4</sub> H <sub>6</sub> O | Methyl vinyl ketone + Methacrolein + Crotonaldehyde | 0.2297 |
| C <sub>4</sub> H <sub>6</sub> O | 2-Butenal                                           | 0.0794 |
| C <sub>4</sub> H <sub>6</sub> O | Methyl vinyl ketone                                 | 0.1348 |
| C <sub>4</sub> H <sub>6</sub> O | Methacrolein                                        | 0.0562 |

The first row, 'Methyl vinyl ketone + Methacrolein + Crotonaldehyde', represents a group of compounds that could not be differentiated in the study/studies from which the average EF was calculated. For the same fuel type, EFs for 2-butenal (syn. crotonaldehyde), methyl vinyl ketone, and methacrolein were reported individually in another study/studies. Since the sum of the EFs for 2-butenal, methyl vinyl ketone, and methacrolein is within 2.5× the EF of 'Methyl vinyl ketone + Methacrolein + Crotonaldehyde', the relative distribution of the individual compounds is used to calculate a fractional contribution of each compound to the single EF, and the AVG is recalculated accordingly. In the resultant dataset, Methyl vinyl ketone + Methacrolein + Crotonaldehyde is removed.

| Formula | Compound                                            | AVG EF |
|---------|-----------------------------------------------------|--------|
| C4H6O   | Methyl vinyl ketone + Methacrolein + Crotonaldehyde |        |
| C4H6O   | 2-Butenal                                           | 0.0734 |
| C4H6O   | Methyl vinyl ketone                                 | 0.1281 |
| C4H6O   | Methacrolein                                        | 0.0533 |

The criteria for this process are as follows: within a unique chemical formula, there must be both a 'lumped compound' (Category 2 id) and 'speciated compounds' (Category 1 id). In some cases, the lumped compound explicitly lists the speciated compounds, indicated by a '+' symbol in the name (e.g., '1-butyne + 2-butyne,' 'Acetic acid + glycolaldehyde,' 'Acetone + propanal'). The Python script identifies these by searching for the '+' symbol, splitting the compound name accordingly, and then searching for these individual ids in the merged dataset. If found, they are grouped together. Consequently, two distinct subsets of the dataset are used for the calculation of fractional contribution: one contains lumped compounds that explicitly list the individual compounds, while the other includes lumped compounds that do not specify the individual compounds. Table S15 lists the size of these subsets and the number of unique formulae in each, resulting in a total of 135 unique formula for which fractional distributions were assigned.

| Table S15: Descriptions of NMOC_g datasets selected for fractional contribution assignment. |                       |                           |
|---------------------------------------------------------------------------------------------|-----------------------|---------------------------|
| Dataset                                                                                     | Size (columns x rows) | Number of Unique Formulae |
| Lumped NMOC_g compounds with speciated compounds                                            | 255 x 57              | 15                        |
| Lumped NMOC_g compounds without speciated compounds                                         | 255 x 540             | 120                       |

## S5. Recommended EF Dataset

The final product in the NEIVA database is a dataset of recommended EFs based on the study-averaged EFs summarized in the integrated EF dataset. The recommended EF dataset includes a single average EF for each compound or constituent in each of the 14 fuel and fire types, and an uncertainty estimate based on one standard deviation of the averaged EF values. Prior to averaging, NO<sub>x</sub> EFs in the integrated EF dataset were converted to NO equivalent EFs as follows, when NO and NO<sub>2</sub> EFs were also available:

$$\text{EF NO}_x \text{ as NO} = \text{EF NO} + \text{EF NO}_2 * (\text{M}_{\text{NO}}/\text{M}_{\text{NO}_2}) [\text{M}_{\text{NO}}/\text{M}_{\text{NO}_2} = 30/46]$$

The columns in the recommended EF dataset are listed in Table S16.



| Table S16: Column headers and rows in the recommended EF dataset. |                                                                                                                                                       |
|-------------------------------------------------------------------|-------------------------------------------------------------------------------------------------------------------------------------------------------|
| Column name                                                       | Description                                                                                                                                           |
| mm                                                                | Molecular weight                                                                                                                                      |
| formula                                                           | Chemical formula                                                                                                                                      |
| compound                                                          | Chemical compound name                                                                                                                                |
| AVG                                                               | Calculated average of all emission factor columns within the specific fire type                                                                       |
| N                                                                 | Number of studies included in the average calculation                                                                                                 |
| STD                                                               | Standard deviation                                                                                                                                    |
| study                                                             | The first author's name and year of publication is combined in one string. Multiple studies are separated by ';'. For instance (stockwell15; hatch15) |
| id                                                                | Unique identity                                                                                                                                       |

## S6. Chemical Mechanism Surrogate and Property Dataset

For the gaseous NMOCs included in the integrated, processed, and recommended EF datasets, model surrogate species were assigned for SAPRC-07/07T/18/22 (Carter, 2010, 2020, 2023a), MOZART-T1(Emmons et al., 2020), and GEOS-Chem (Bey et al., 2001; Carter et al., 2022) chemical mechanisms. The number of model surrogates used to represent the ~1000 individual gaseous NMOCs in NEIVA are summarized in Table S17 for each chemical mechanism.

| Table S17: Number and list of model surrogates used to represent the individual gaseous NMOCs.                                                                                                                                                                        |                      |                                                                                                                                                                                                                                                                                                                                                                                                                                                                                                             |
|-----------------------------------------------------------------------------------------------------------------------------------------------------------------------------------------------------------------------------------------------------------------------|----------------------|-------------------------------------------------------------------------------------------------------------------------------------------------------------------------------------------------------------------------------------------------------------------------------------------------------------------------------------------------------------------------------------------------------------------------------------------------------------------------------------------------------------|
| Chemical Mechanism                                                                                                                                                                                                                                                    | Number of Surrogates | List of Model Surrogates                                                                                                                                                                                                                                                                                                                                                                                                                                                                                    |
| SAPRC-07, SAPRC-07T*<br>*in S-07T the following species are explicitly represented: 1,3 butadiene (13BDE), acrolein (ACRO), alpha-pinene (APIN), 1,2,4-trimethylbenzene (B124), ethanol (ETOH), m-/o-/p-xylene (MXYL, OXYL, PXYL), propene (PRPE), and toluene (TOLU) | 37                   | ACYE, NROG, ETHE, HCHO, ALK1, MEOH, OLE1, PRD2, ALK3, CCHO, ALK2, ALK5, FACD, OLE2, MACR, GLY, RCHO, ACET, AACD, ALK4, ARO2, ISOP, PACD, IPRD, MVK, MGLY, MEK, RNO3, BENZ, ARO1, BACL, CRES, BALD, TERP, ROOH, AFG3                                                                                                                                                                                                                                                                                         |
| SAPRC-18, SAPRC-22*<br>*in S-22, there are four additional species: higher MW alkanes (ALK6) and amines bounded to a tertiary carbon (TAMNS) are added, catechol (CATL) replaces SVPHE, and acetic acid (OACID) replaces (AACID)                                      | 79                   | ACETL, NROG, ETHEN, HCHO, ETHAN, MEOH, OLE1, ACYLS, KET2, PROPE, AMINS, OTH3, MECHO, PROP, ETOH, HCOOH, OTH4, BUT13, ACRO, OLE2, OLE3, GLY, OLEP, ETCHO, ACET, NC4, ALK3, OTH1, AACID, GLCHO, ROOH, OLEC, FURNS, OLED, ISOP, RCOOH, OLEA1, MVK, MACR, ALK4, OLE4, LVKS, MGLY, RCHO, MEK, R1NO3, BENZ, ARO1, OLEA2, ALK5, BACL, OTH2, TOLU, PHEN, MALAH, STYRS, BALD, C2BEN, OXYL, MXYL, PXYL, CRES, XYNL, SVPHE, TERP, NAPS, ARO2, BZ124, BZ135, BZ123, AFG3, BENX, APINE, BPINE, DLIMO, INHIB, RTCHO, SESQ |
| MOZART-T1                                                                                                                                                                                                                                                             | 37                   | C2H2, NROG, C2H4, C2H6, CH2O, CH3OH, BIGENE, C3H6,                                                                                                                                                                                                                                                                                                                                                                                                                                                          |

|           |    |                                                                                                                                                                                                                          |
|-----------|----|--------------------------------------------------------------------------------------------------------------------------------------------------------------------------------------------------------------------------|
|           |    | CH3CHO, C3H8, C2H5OH, HCOOH, GLYOXAL, BIGALK, CH3COCH3, CH3COOH, GLYALD, TOLUENE, ISOP, MVK, MACR, CH3COCHO, MEK, HYAC, BENZENE, XYLENES, MBO, PHENOL, ALKNIT, BZALD, CRESOL, MYRC, APIN, BPIN, LIMON                    |
| GEOS-Chem | 36 | ACET, ACTA, ALD2, BENZ, C2H4, C2H6, C3H8, CCl4, CH2Br2, CH3Br, CH3Cl, CH3I, CHBr3, CHCl3, DMS, EOH, ETNO3, GLYC, GLYX, HAC, HCOOH, ISOP, LIMO, MACR, MEK, MGLY, MOH, MTPA, MTPO, MVK, NAP, OCS, PROPNN, PYAC, TOLU, XYLE |

Compounds were first assigned to the SAPRC and MOZART-T1 mechanisms (see Table S18) using the SAPRC Mechanism Generation (MechGen) System web interface (Carter, 2019, Carter, 2023b) and the SAPRC model species assignment database ‘SpecDB’(Carter, 2023b). The SAPRC and MOZART-T1 assignments were then used to determine the GEOS-Chem assignments (Table S19), with additional reference to reference to Hutzell et al. (2012), Li et al. (2014), and Carter et al. (2022).

| Table S18: Mapping MOZART-T1 species to SAPRC-18 model species. |                                |
|-----------------------------------------------------------------|--------------------------------|
| <b>SAPRC 18 Model Species</b>                                   | <b>MOZART-T1 Model Species</b> |
| HCHO                                                            | CH2O                           |
| KET2, LVKS, OLEA2, AFG1, MEK                                    | MEK                            |
| OTH3, RCHO, ALK5                                                | BIGALK                         |
| AMINS                                                           | C3H6                           |
| ACYLS, OTH4, OLEP, OLE1, OLE2, OLEC, OLED, BUT13, STYRS, OLE4   | BIGENE                         |
| NROG, OTH2                                                      | NROG                           |
| ROOH, FURNS, ARO1, ARO2, NAPS                                   | XYLENES                        |
| RCOOH, OLEA1                                                    | TOLUENE                        |
| RINO3                                                           | ALKNIT                         |
| PHEN, SVPHE                                                     | PHENOL                         |
| CRES, XYNL                                                      | CRESOL                         |
| DLIMO                                                           | LIMON                          |
| MVK                                                             | MVK                            |

| Table S19: Mapping GEOS-Chem model species to SAPRC-07 model species. |                                |
|-----------------------------------------------------------------------|--------------------------------|
| <b>SAPRC-07 Model Species</b>                                         | <b>GEOS-Chem Model Species</b> |
| ALK1                                                                  | C2H6                           |
| ALK2                                                                  | C3H8                           |
| ALK3, ALK4, ALK5, ACYE, PACD                                          | ALK4                           |
| BALD                                                                  | BALD                           |
| CRES                                                                  | CSL                            |
| Among the CRES compounds, those identified as PHEN in S18B            | PHEN                           |
| OLE1, OLE2                                                            | PRPE                           |
| RCHO                                                                  | RCHO                           |

|                                                                |      |
|----------------------------------------------------------------|------|
| ARO1                                                           | TOLU |
| ARO2                                                           | XYLE |
| TERP (excluding sabinene, alpha-pinene, beta-pinene, 3-carene) | MTPO |
| MVK, 0.5*IPRD                                                  | MVK  |
| MACR, 0.5*IPRD                                                 | MACR |
| Among the ARO2 compounds, those identified as FURNS in S18B    | FURA |
| Among the ARO2 compounds, those identified as NAPS in S18B     | NAPS |
| BACL                                                           | MGLY |
| MEK                                                            | MEK  |
| PRD2                                                           | MEK  |
| ROOH                                                           | MP   |
| TERP (excluding alpha pinene, beta pinene, sabinene, carene)   | MTPO |
| RNO3                                                           | R4N2 |

Two SAPRC-07 model surrogates, AFG3 and NROG, were not assigned to GEOS-Chem species. The list of compounds that are mapped to those model surrogates is shown in Table S20. The summed EFs for compounds assigned to GEOS-Chem surrogates and for compounds that were not assigned to GEOS-Chem surrogates is shown in Table S21.

| Table S20: The compounds mapped to SAPRC-07 species AFG3 and NROG, and thus not assigned in the GEOSChem EFs. |         |                            |      |
|---------------------------------------------------------------------------------------------------------------|---------|----------------------------|------|
| mm                                                                                                            | formula | compound                   | S07  |
| 27                                                                                                            | HCN     | Hydrogen cyanide           | NROG |
| 41                                                                                                            | C2H3N   | Acetonitrile               | NROG |
| 61                                                                                                            | CH3NO2  | Nitromethane               | NROG |
| 102                                                                                                           | C4H6O3  | Acetic anhydride           | NROG |
| 105                                                                                                           | C3H7NO3 | Isopropyl nitrate          | NROG |
| 117                                                                                                           | C8H7N   | Benzeneacetonitrile        | NROG |
| 119                                                                                                           | C4H9NO3 | 2-Butyl nitrate            | NROG |
| 123                                                                                                           | C6H5NO2 | Nitrobenzene               | NROG |
| 124                                                                                                           | C6H4O3  | Hydroxybenzoquinone        | AFG3 |
| 130                                                                                                           | CF2Cl2  | Dichlorodifluoromethane    | NROG |
| 131                                                                                                           | C9H9N   | Methyl benzeneacetonitrile | NROG |
| 144                                                                                                           | C2H3Cl3 | 1,1,1-Trichloroethane      | NROG |
| 147                                                                                                           | CFC13   | Trichlorofluoromethane     | NROG |
| 174                                                                                                           | CHBrCl2 | Bromodichloromethane       | NROG |
| 195                                                                                                           | C2F3Cl3 | Trichlorotrifluoroethane   | NROG |

| Table S21: Summed EFs for compounds assigned and not assigned to GEOS-Chem model surrogates. |                                                                    |                                                                      |
|----------------------------------------------------------------------------------------------|--------------------------------------------------------------------|----------------------------------------------------------------------|
| Fire type                                                                                    | $\Sigma \text{EF}_{\text{NMOC}_g, \text{assigned}} \text{ (g/kg)}$ | $\Sigma \text{EF}_{\text{NMOC}_g, \text{unassigned}} \text{ (g/kg)}$ |
| Tropical forest                                                                              | 24.25                                                              | 1.08                                                                 |
| Temperate forest                                                                             | 40.39                                                              | 2.10                                                                 |
| Boreal forest                                                                                | 38.33                                                              | 2.16                                                                 |
| Savanna                                                                                      | 34.43                                                              | 2.85                                                                 |
| Crop residue                                                                                 | 36.71                                                              | 1.35                                                                 |
| Peat                                                                                         | 65.75                                                              | 7.9                                                                  |

In addition to the model surrogates, relevant property data for each of the NMOC\_g in the integrated and recommended EF datasets was compiled in the property dataset. Most of the property data came from the Estimation Programs Interface (EPI) Suite developed by the US EPA (2023). In addition, a Python-based web scraper was used to collect data from the following data sources: UManSysProp (Topping et al., 2016), PubChem (Kim et al., 2021, 2023), ChemSpider (Pence and Williams, 2010), and NIST Chemistry Webbook (NIST Chemistry WebBook, 2022). When multiple values were available for a given property, experimental values were prioritized over the approximated values using the estimation methods. Data sources are listed in the reference column of the property dataset.

| Table S22: The description and units of property variables. |                                                             |                             |
|-------------------------------------------------------------|-------------------------------------------------------------|-----------------------------|
| Column name                                                 | Description                                                 | Unit                        |
| mm                                                          | Molecular mass                                              | g/mole                      |
| formula                                                     | Molecular formula                                           |                             |
| compound                                                    | Compound name obtained from the source publication          |                             |
| SMILES                                                      | Simplified Molecular Input Entry System                     |                             |
| S07                                                         | SAPRC-07 chemical mechanism model species                   |                             |
| S07T                                                        | SAPRC-07T (toxics version) chemical mechanism model species |                             |
| S18B                                                        | SAPRC-18 chemical mechanism model species                   |                             |
| S22                                                         | SAPRC-22 chemical mechanism model species                   |                             |
| MOZT1                                                       | MOZART-T1 chemical mechanism model species                  |                             |
| GEOSChem                                                    | GEOS-Chem chemical mechanism model species                  |                             |
| kOH                                                         | OH rate constant                                            | cm <sup>3</sup> /molecule s |
| kOH_ref                                                     | Reference for OH rate constant data                         |                             |
| ko3_exp                                                     | O <sub>3</sub> rate constant experimental values            | cm <sup>3</sup> /molecule s |
| kno3_exp                                                    | NO <sub>3</sub> rate constant experimental values           | cm <sup>3</sup> /molecule s |
| vp_nannoolal                                                | Vapor pressure estimated based on Nannoolal et al. (2008)   | mm Hg                       |
| vp_EPISuite                                                 | Vapor pressure estimated based on EPI SUITE                 | mm Hg                       |
| vp_ref                                                      | Reference for vapor pressure data obtained from EPI SUITE   |                             |
| cstar                                                       | Saturation vapor concentration (log 10)                     | μg/m <sup>3</sup>           |
| hc_EPISuite                                                 | Henry's law constant estimated based on EPI SUITE           | atm-m <sup>3</sup> /mole    |
| hc_ref                                                      | Reference for Henry's law constant obtained from EPI SUITE  |                             |
| OCratio                                                     | O to C ratio                                                |                             |
| Oxidation_state                                             | Oxidation state                                             |                             |
| id                                                          | Unique Identifier                                           |                             |

## S7. Additional Results Figures

### Comparisons between NEIVA and Andreae (2019)

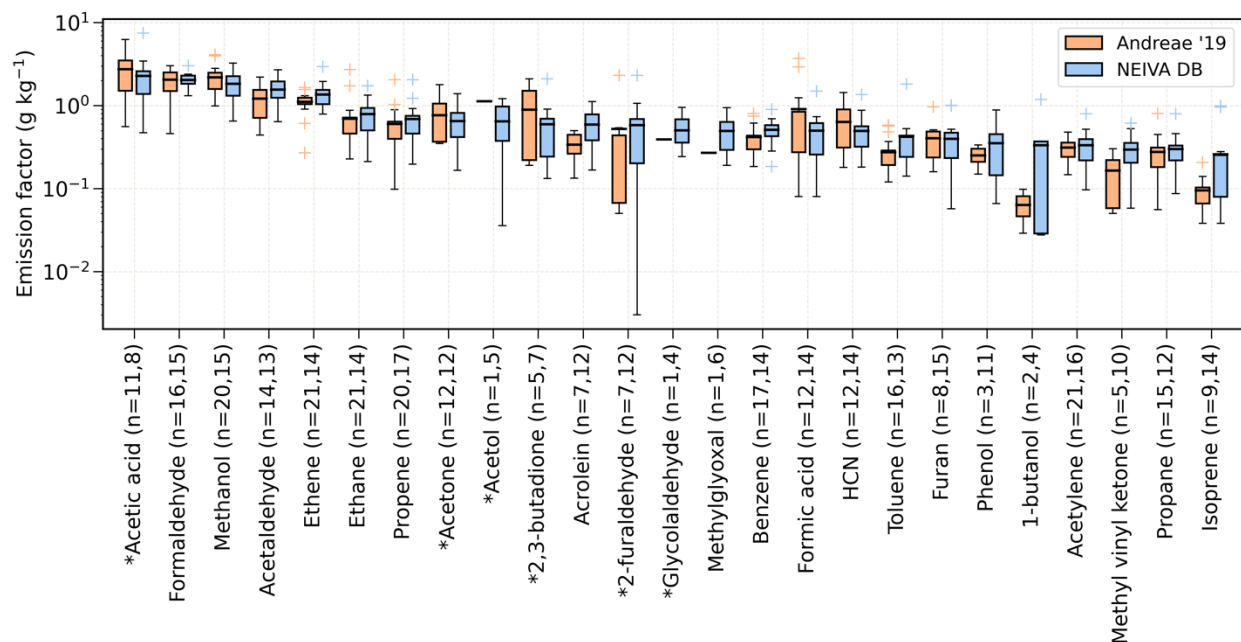

**Figure S6: The 25 most abundant NMOCs\_g EFs for temperate forest. The box and whiskers represent the data in the processed EF dataset. The black lines indicate the mean values and are equivalent to the recommended EFs. The outliers ( $> 1.5 \times$  above/below the interquartile range) are indicated by the plus symbols. Compounds marked with an asterisk before the name have had application of isomeric distributions. The number of observations is listed in parenthesis (“n”) with Andreae followed by NEIVA.**

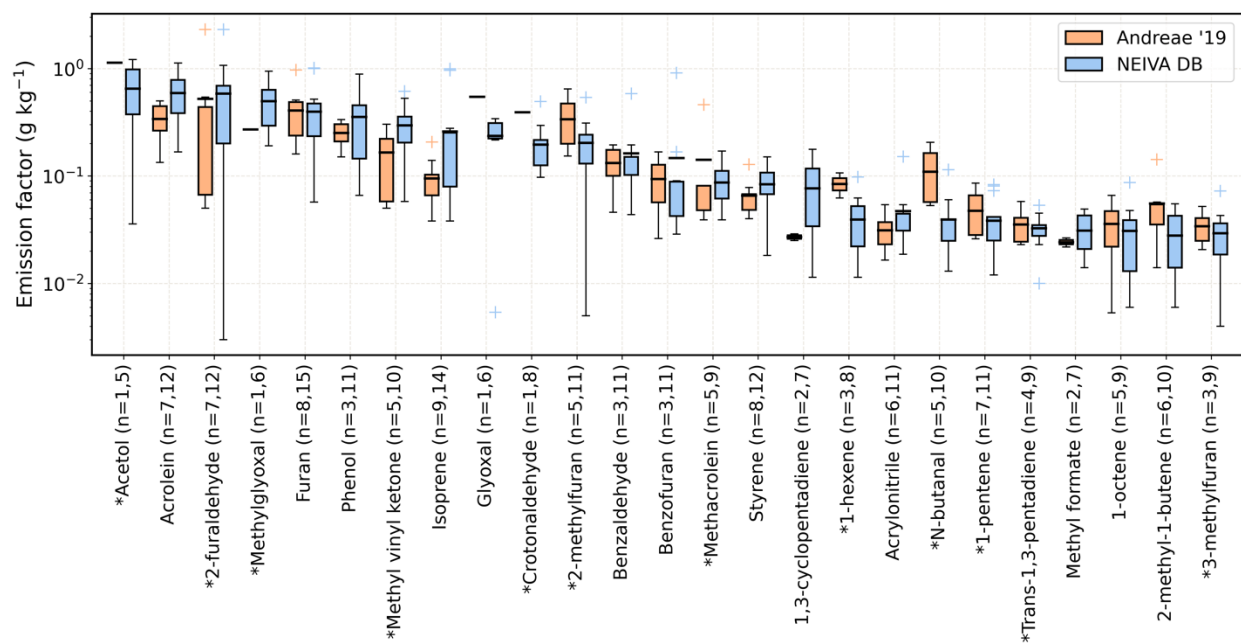

**Figure S7: NMOC\_g EFs for temperate forest in which n NEIVA > n Andreae (where “n” is the number of observations). The box and whiskers represent the data in the processed EF dataset. The black lines indicate the mean values and are equivalent to the recommended EFs. The outliers ( $> 1.5 \times$  above/below the interquartile range) are indicated by the plus symbols. Compounds marked with an asterisk before the name have had application of isomeric distributions. The number of observations is listed in parenthesis (“n”) with Andreae followed by NEIVA.**

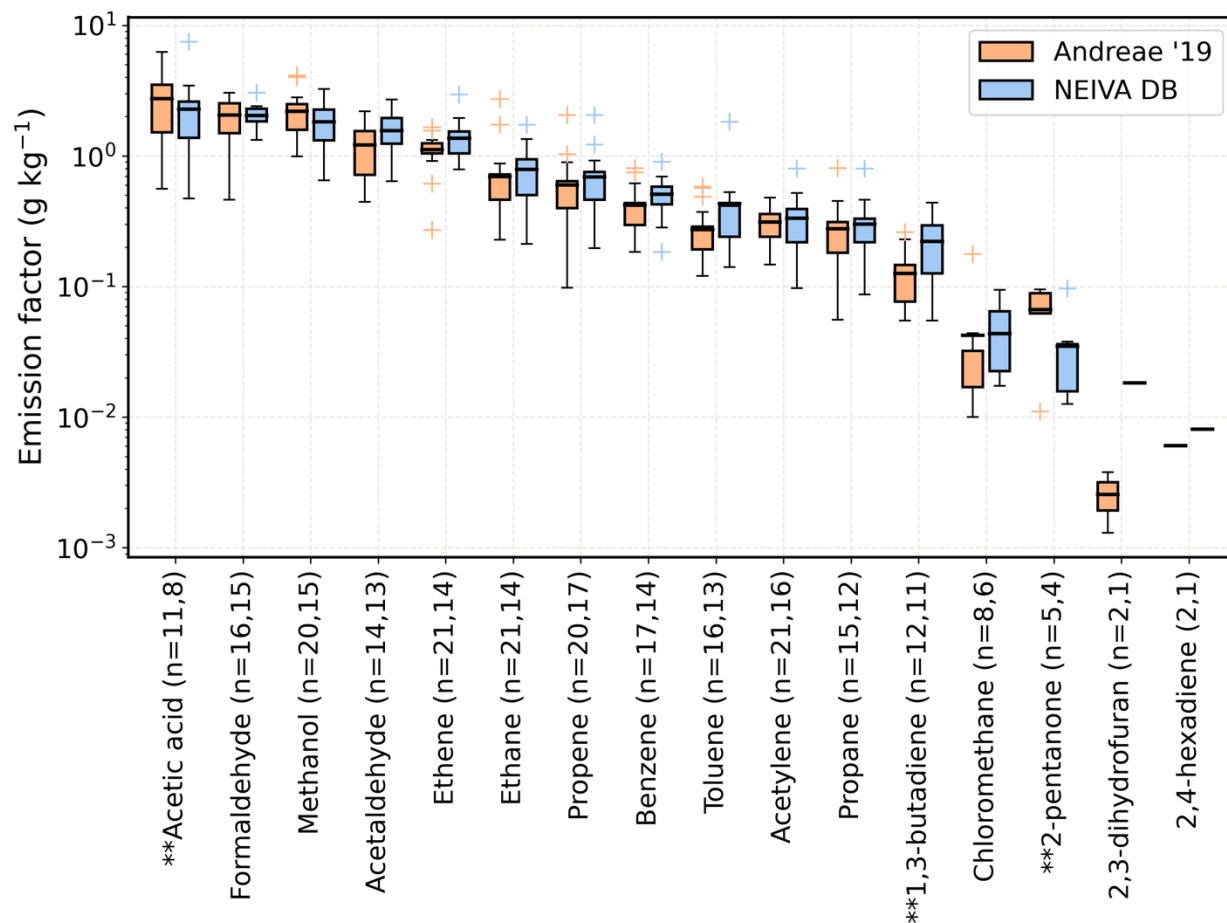

Figure S8: NMOG<sub>g</sub> EFs for temperate forest in which  $n_{\text{NEIVA}} < n_{\text{Andreae}}$  (where “n” is the number of observations). The box and whiskers represent the data in the processed EF dataset. The black lines indicate the mean values and are equivalent to the recommended EFs. The outliers ( $> 1.5 \times$  above/below the interquartile range) are indicated by the plus symbols. Compounds marked with an asterisk before the name have had application of isomeric distributions. The number of observations is listed in parenthesis (“n”) with Andreae followed by NEIVA.

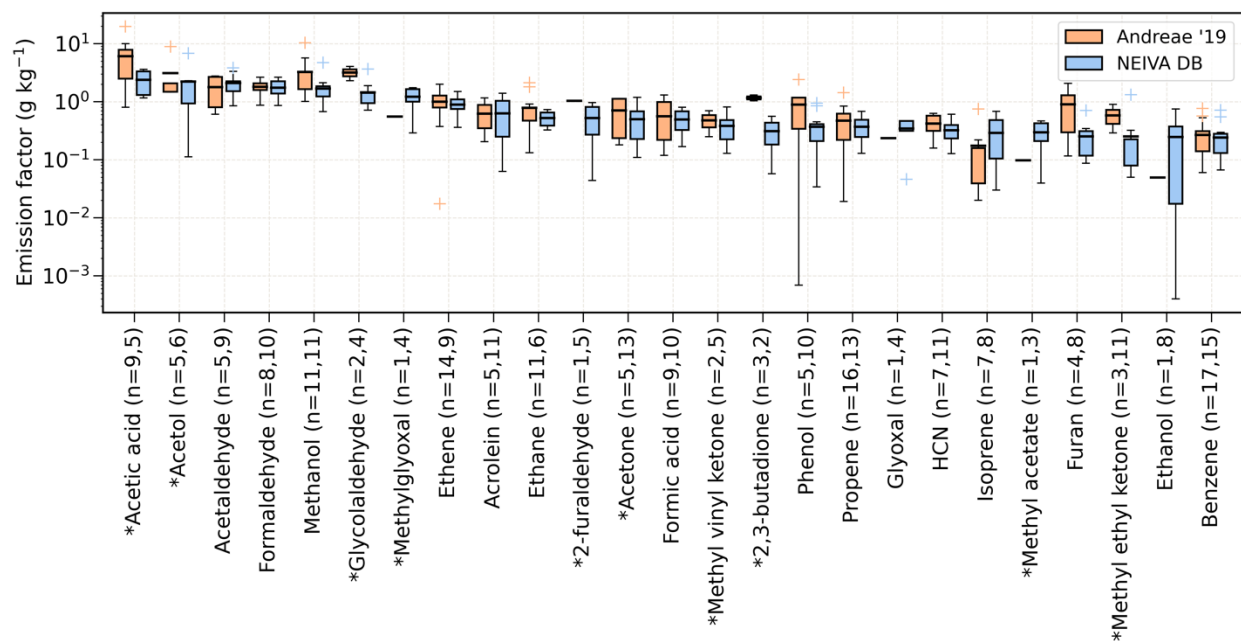

**Figure S9: The 25 most abundant NMOC<sub>g</sub> EFs for crop residue. The box and whiskers represent the data in the processed EF dataset. The black lines indicate the mean values and are equivalent to the recommended EFs. The outliers ( $> 1.5 \times$  above/below the interquartile range) are indicated by the plus symbols. Compounds marked with an asterisk before the name have had application of isomeric distributions. The number of observations is listed in parenthesis (“n”) with Andreae followed by NEIVA.**

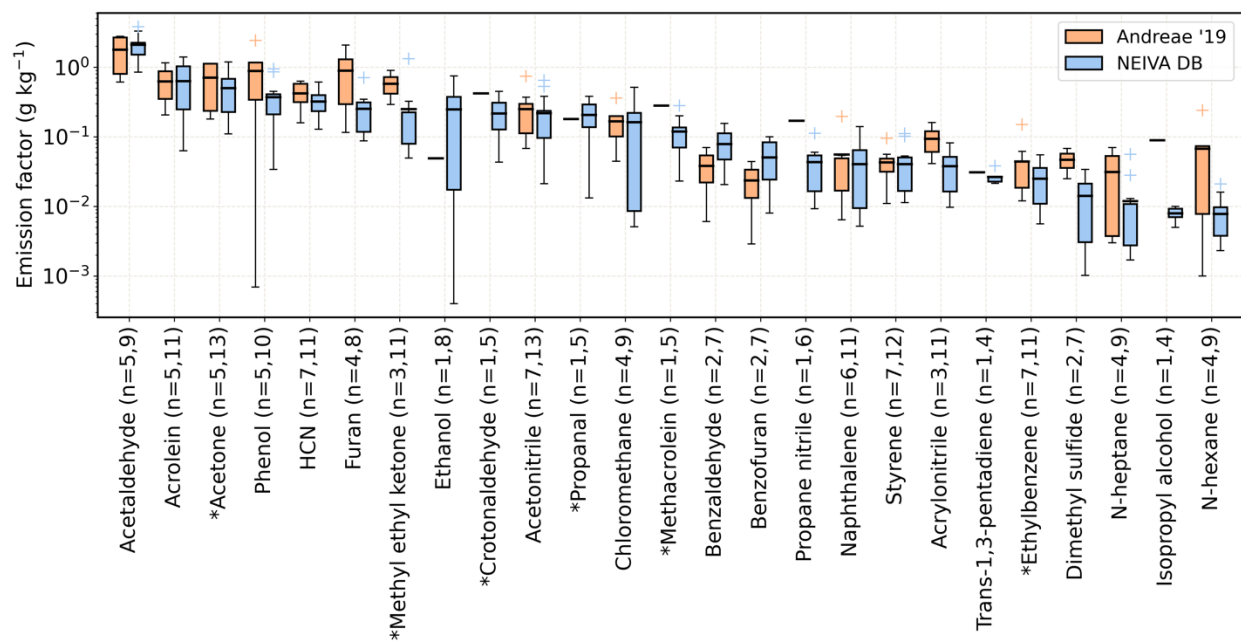

**Figure S10: NMOC<sub>g</sub> EFs for crop residue in which n NEIVA > n Andreae (where “n” is the number of observations). The box and whiskers represent the data in the processed EF dataset. The black lines indicate the mean values and are equivalent to the recommended EFs. The outliers ( $> 1.5 \times$  above/below the interquartile range) are indicated by the plus symbols. Compounds marked with an asterisk before the name have had application of isomeric distributions. The number of observations is listed in parenthesis (“n”) with Andreae followed by NEIVA.**



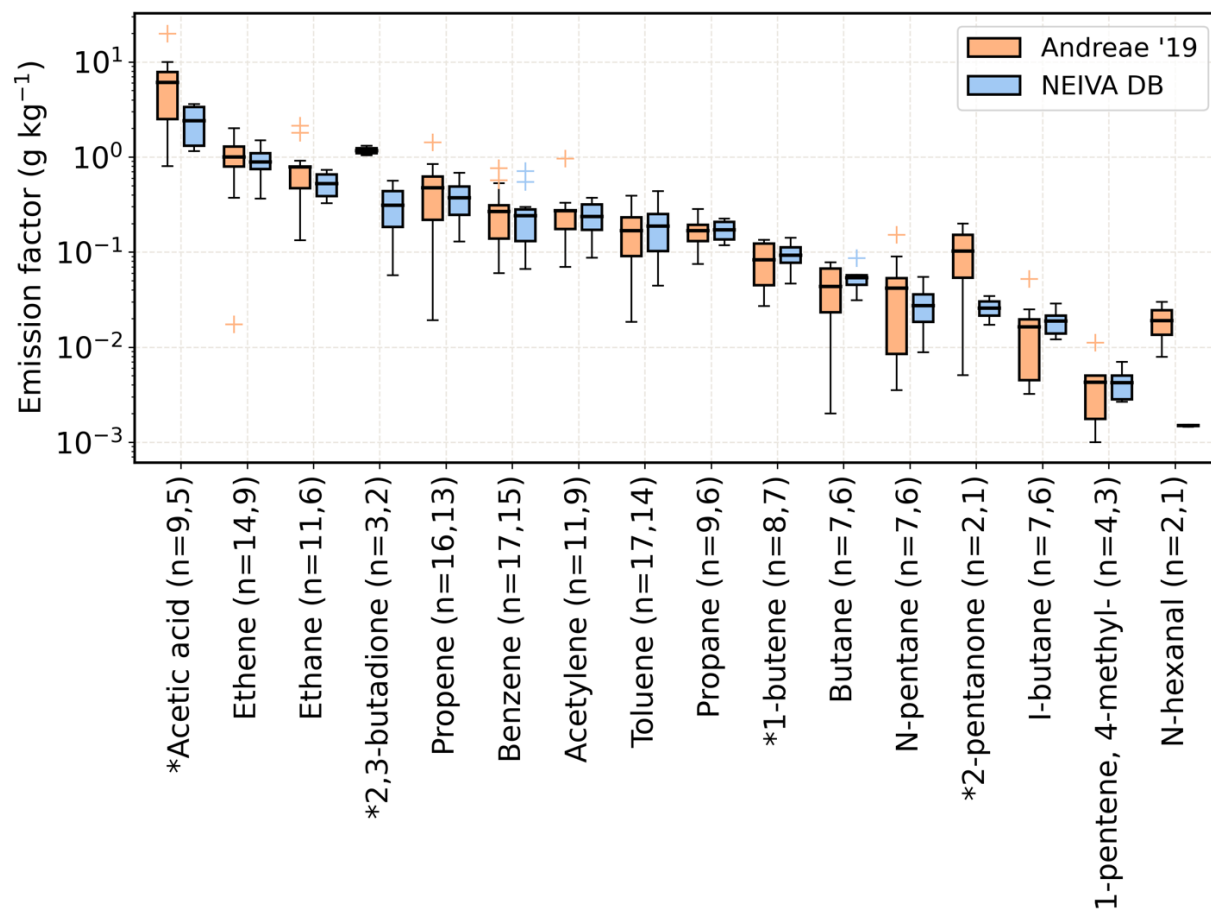

Figure S11: NMOG\_g EFs for crop residue in which  $n_{\text{NEIVA}} < n_{\text{Andreae}}$  (where “n” is the number of observations). The box and whiskers represent the data in the processed EF dataset. The black lines indicate the mean values and are equivalent to the recommended EFs. The outliers ( $> 1.5 \times$  above/below the interquartile range) are indicated by the plus symbols. Compounds marked with an asterisk before the name have had application of isomeric distributions. The number of observations is listed in parenthesis (“n”) with Andreae followed by NEIVA.

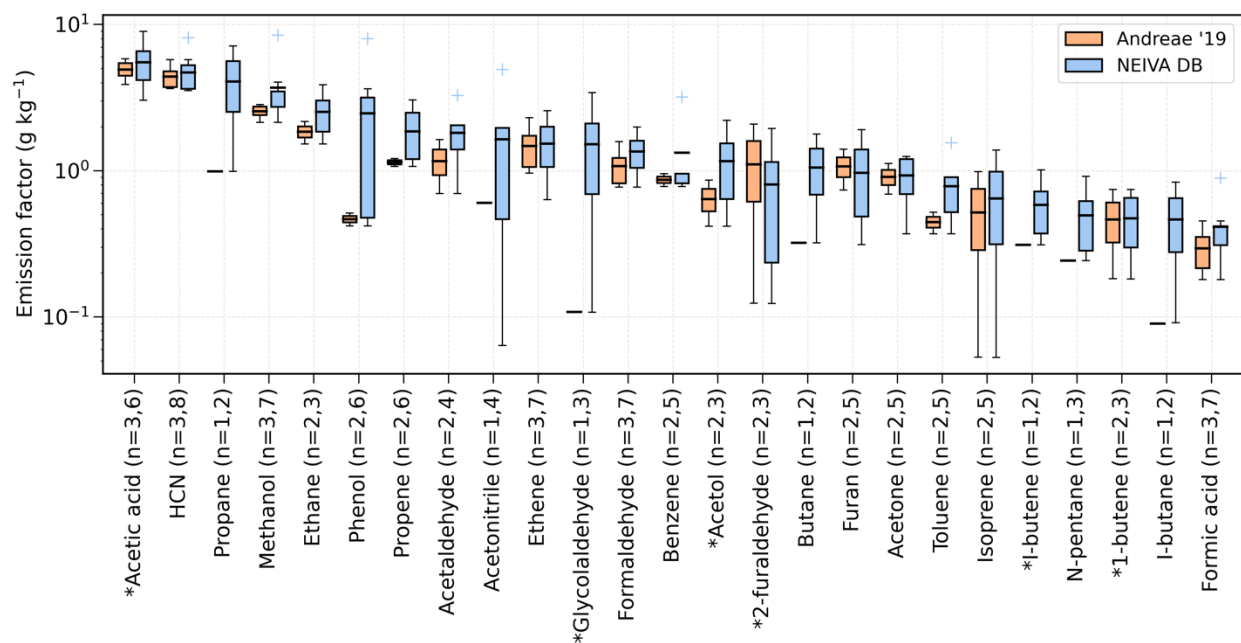

**Figure S12: The 25 most abundant NMOC\_g EFs for peat. The black lines indicate the mean values and are equivalent to the recommended EFs in the NEIVA database. The box and whiskers represent the data in the processed EF dataset. The black lines indicate the mean values and are equivalent to the recommended EFs. The outliers ( $> 1.5 \times$  above/below the interquartile range) are indicated by the plus symbols. Compounds marked with an asterisk before the name have had application of isomeric distributions. The number of observations is listed in parenthesis (“n”) with Andreae followed by NEIVA.**

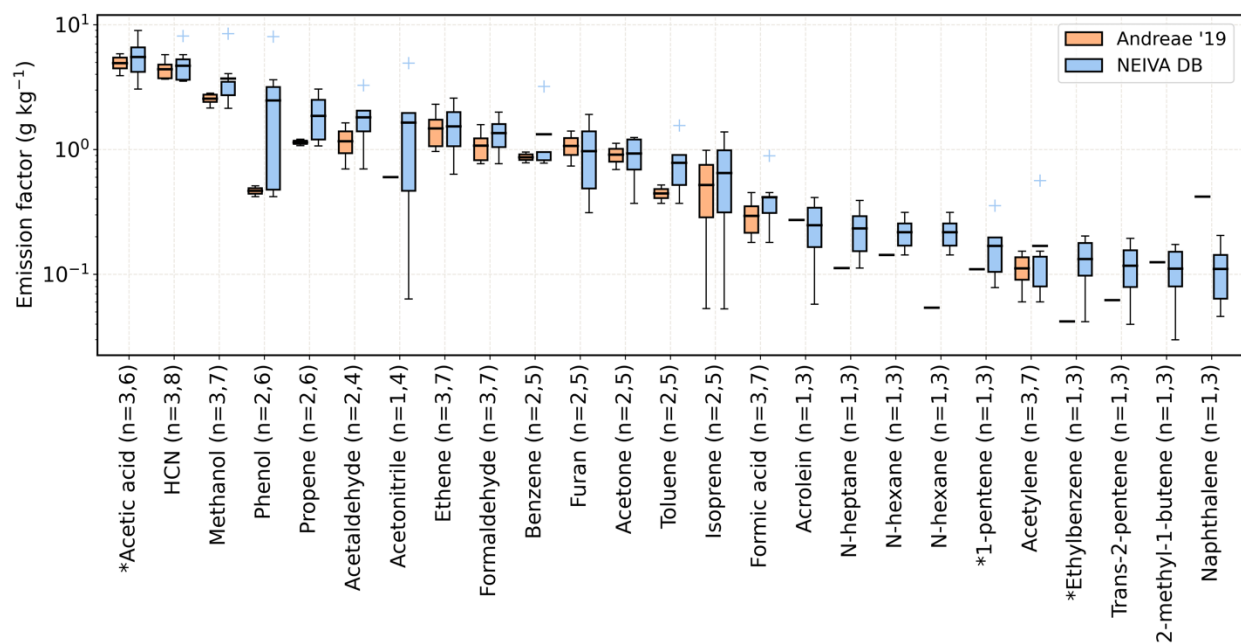

**Figure S13: NMOC\_g EFs for peat in which n NEIVA > n Andreae (where “n” is the number of observations). The box and whiskers represent the data in the processed EF dataset. The black lines indicate the mean values and are equivalent to the recommended EFs. The outliers ( $> 1.5 \times$  above/below the interquartile range) are indicated by the plus symbols. Compounds marked with an asterisk before the name have had application of isomeric distributions. The number of observations is listed in parenthesis (“n”) with Andreae followed by NEIVA.**

### Numbers of Compounds Needed to Represent 90% of the Total NMOC\_g EF

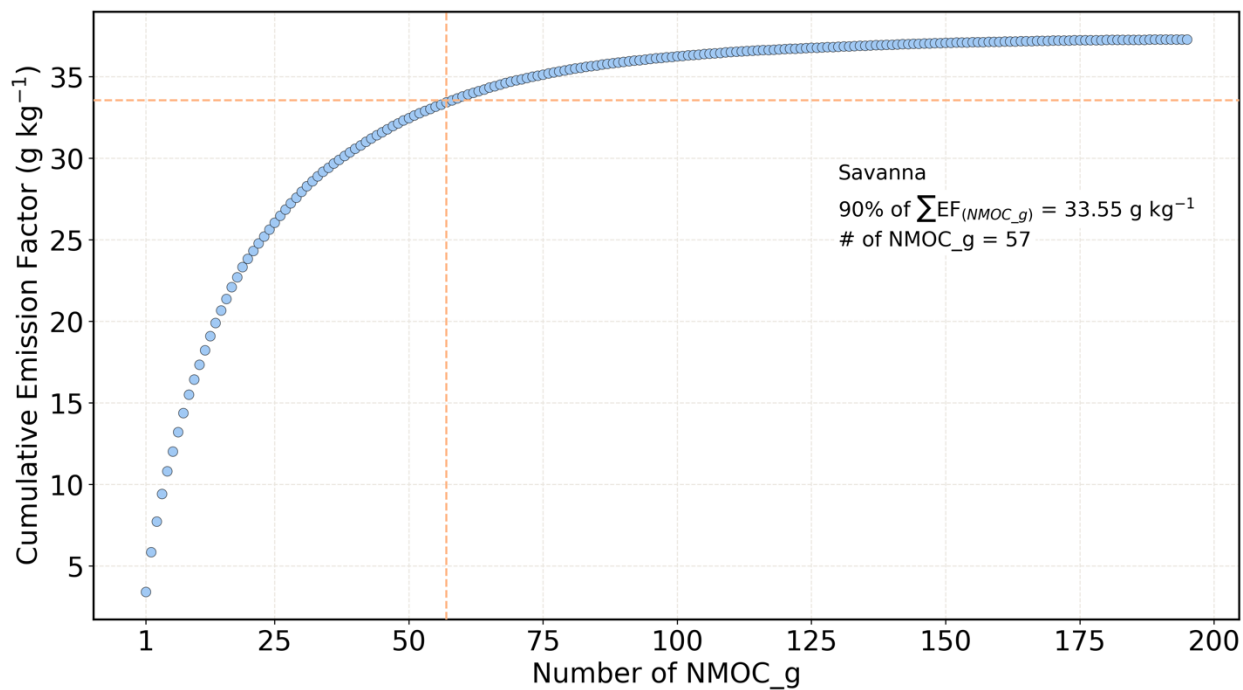

Figure S14: Number of compounds needed to represent 90% savanna NMOC\_g EF.

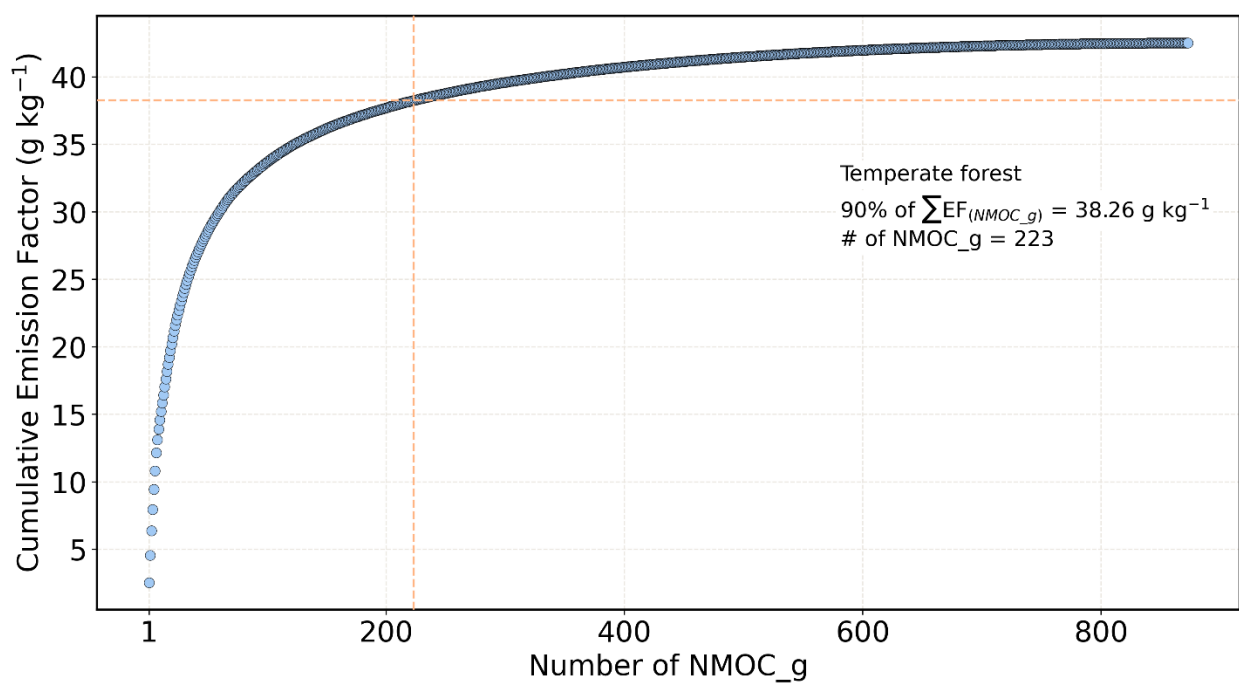

Figure S15: Number of compounds needed to represent 90% temperate forest NMOC\_g EF.

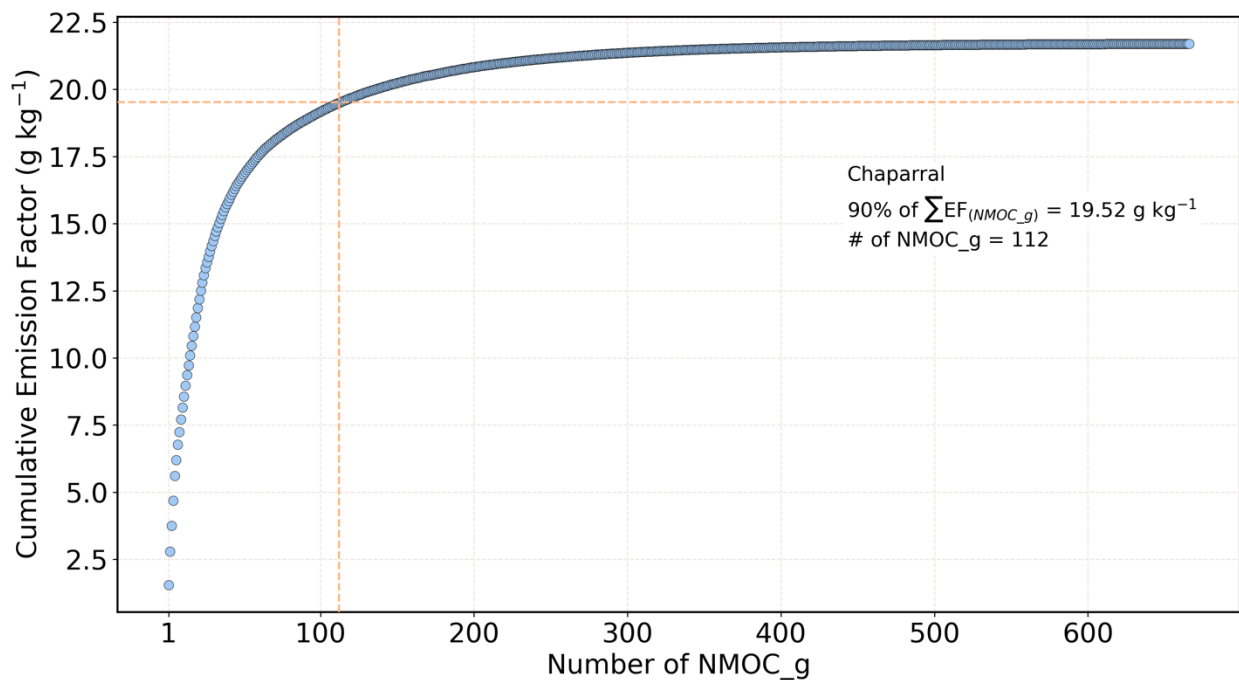

Figure S16: Number of compounds needed to represent 90% chaparral NMOC\_g EF.

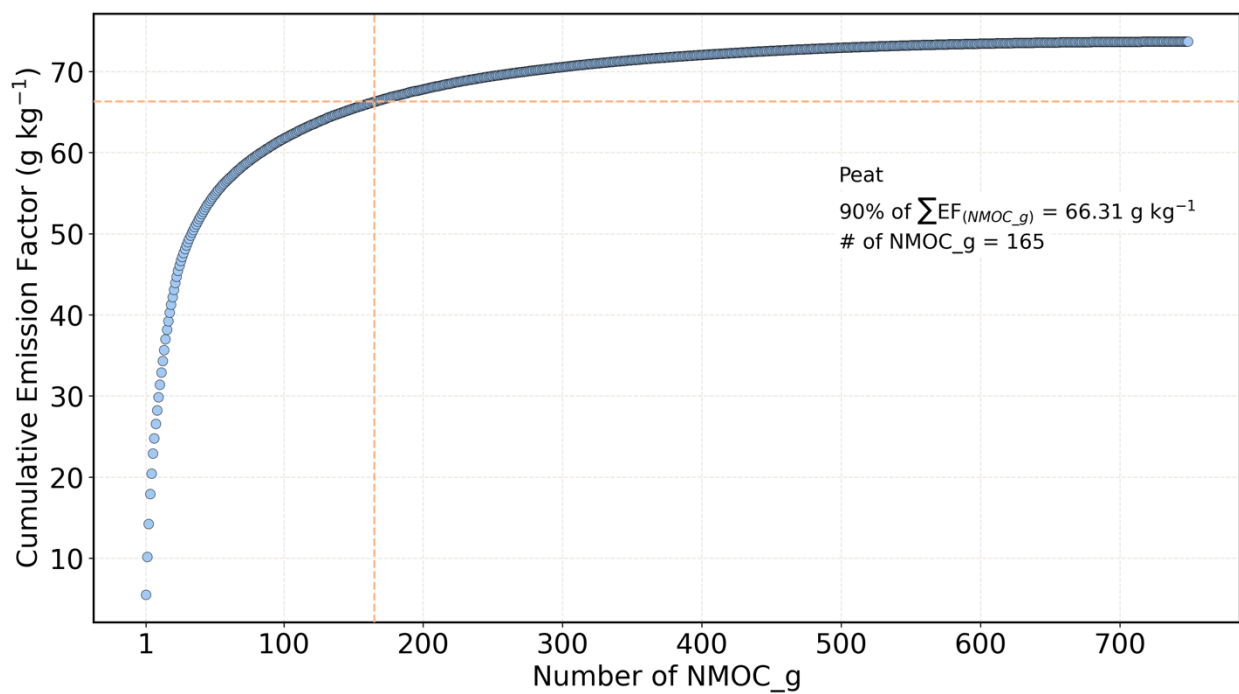

Figure S17: Number of compounds needed to represent 90% peat NMOC\_g EF.

## S8. Backend Database

This database contains tables that are used within the python script files to perform the data processing and data integration steps, to produce the datasets, and to query the datasets.

| Table S23: Description tables comprises the backend database.                                                            |                                     |                                                                                                                                                                                                                                                                                  |
|--------------------------------------------------------------------------------------------------------------------------|-------------------------------------|----------------------------------------------------------------------------------------------------------------------------------------------------------------------------------------------------------------------------------------------------------------------------------|
| Category                                                                                                                 | Table Name                          | Description                                                                                                                                                                                                                                                                      |
| Information tables for data processing and query functions.                                                              | bkdb_info_efcol_integrated_ef       | This information table contains the EF column names from the integrated EF dataset, along with related details such as fire type, measurement type, reference study, and publication year.                                                                                       |
|                                                                                                                          | bkdb_info_efcol_processed_ef        | This information table contains the EF column names from the processed EF dataset, along with related details such as fire type, measurement type, reference study, and publication year.                                                                                        |
|                                                                                                                          | bkdb_info_table_name                | This table includes the names of tables from the legacy, raw, and primary databases, along with details like fire type, measurement type, reference publication (DOI), year of publication, and reference to the source table.                                                   |
|                                                                                                                          | bkdb_info_efcol_rdb_ldb             | This table include the EF column names of from all tables in the legacy and raw database, along with related information such as fire type, measurement type.                                                                                                                    |
| Data processing table. Used in data processing from raw database to primary database.                                    | bkdb_correction_factor              | For the % C correction described in S2, this dataset includes the EF column names and associated % C correction factor.                                                                                                                                                          |
| These tables are produced during the data integration process, and used for merging compounds that do not have an InChI. | bkdb_nmog_LumCom                    | This dataset is a subset of the integrated dataset and includes lumped compounds with a '+' sign in the compound name extracted from the integrated dataset.                                                                                                                     |
|                                                                                                                          | bkdb_nmog_LumCom_altName            | This dataset is a replicate of 'bkdb_nmog_LumCom,' with the inclusion of an extra column named 'altered_name.' This column provides users with the flexibility to adjust the lumped compound name(s) or constituent compound(s) name(s).                                         |
|                                                                                                                          | bkdb_nmog_MultLumCom                | This dataset contains lumped compounds that have more than one group of lumped compounds for a given formula.                                                                                                                                                                    |
|                                                                                                                          | bkdb_nmog_MultLumCom_slc_id         | In this dataset lumped compounds with the same chemical formula are consolidated into a single row (i.e., considered the same compound). The representative compound name is selected based on the longest name among the lumped compounds and the corresponding id is selected. |
|                                                                                                                          | bkdb_nmog_MultLumCom_slc_id_altName | This dataset is the same as the 'bkdb_nmog_MultLumCom_slc_id,' but it includes an extra column named 'altered_name,' This column provides users                                                                                                                                  |

|                                                                                                                              |                                  |                                                                                                                                                                                                                                                                                                                                                    |
|------------------------------------------------------------------------------------------------------------------------------|----------------------------------|----------------------------------------------------------------------------------------------------------------------------------------------------------------------------------------------------------------------------------------------------------------------------------------------------------------------------------------------------|
|                                                                                                                              |                                  | with the flexibility to adjust the lumped compound name(s) or constituent compound(s) name(s).                                                                                                                                                                                                                                                     |
| Used for data sorting following the data integration step.                                                                   | bkdb_pm_order_seq                | This dataset lists the PM constituents in the following order: PM size, PM organic, PM elemental, PM ion, PM metal and NMOC_p.                                                                                                                                                                                                                     |
| Used during the ER adjustment data processing step.                                                                          | bkdb_compound_flaming_combustion | The list of flaming-dominant compounds and their unique ids.                                                                                                                                                                                                                                                                                       |
| These datasets are produced during data integration and used during the fractional contribution data processing step.        | bkdb_fc_calc_simple              | The list of lumped compounds without specified compounds.                                                                                                                                                                                                                                                                                          |
|                                                                                                                              | bkdb_fc_calc_specific            | The list of lumped compounds with specified compounds.                                                                                                                                                                                                                                                                                             |
| Chemical mechanism and property assignment tables. These tables are used in generating the property and reactivity profiles. | chem_property_h15isomers         | This information table includes compounds reported by Hatch et al. (2015) with Type-2 IDs, which represent isomeric compounds with unknown chemical structures, that were assigned model surrogate and properties based on the nearest identified compound. This proximity was determined using the first- and second-dimension retention indices. |
|                                                                                                                              | chem_property_inchi              | This information table includes compounds with Type 1 IDs, which represent single identified compounds, that were assigned model surrogate and properties based on SMILES and functional group type(s).                                                                                                                                            |
|                                                                                                                              | chem_property_lumpCom            | This information table includes lumped compounds without specified constituent compounds, that were assigned model surrogate and properties based on the descriptive names, such as C11 Aromatics and C9 Nitriles.                                                                                                                                 |
|                                                                                                                              | chem_property_lumpCom_spec       | This information table includes lumped compounds with specified constituent compounds, that were assigned model surrogate and properties based on their individual components.                                                                                                                                                                     |

| Table S24: Description of functions that display information. |                                                                  |                                                                                                                                                                                                                                                                                                            |
|---------------------------------------------------------------|------------------------------------------------------------------|------------------------------------------------------------------------------------------------------------------------------------------------------------------------------------------------------------------------------------------------------------------------------------------------------------|
| Function name                                                 | Input                                                            | Description                                                                                                                                                                                                                                                                                                |
| fire_type()                                                   | Not required.                                                    | This function returns the list of fire types.                                                                                                                                                                                                                                                              |
| table_info()                                                  | Database, fire type                                              | This function returns a list of table names along with associated information such as measurement type, publication DOI, pollutant category for a specified database name and fire type.                                                                                                                   |
| summary_table()                                               | Fire type, measurement type                                      | This function returns a list of table names along with associated information such as measurement type, publication DOI, pollutant category for a specified database name and fire type.                                                                                                                   |
| display_pollutant_category()                                  | Not required.                                                    | This function displays the list of pollutant category of recommended EF table.                                                                                                                                                                                                                             |
| property_variables()                                          |                                                                  | This function provides descriptions of property variables, their units, and the data sources associated with them .The Property_Surrogate table comprises atmospheric modeling-relevant property variables of compounds. The chemical mechanism surrogate and property dataset is discussed in section S6. |
| model_surrogate()                                             | Chemical mechanism (e.g., S07, S07T, S18B, S22, MOZT1, GEOSChem) | This function retrieves the unique set of model surrogates for a specified chemical mechanism.                                                                                                                                                                                                             |

| Table S25: Description of functions used to query EF data and properties of NMOC_g. |                                                                   |                                                                                                                                                                                                                                                                                                                                                                                                                                                                                                                                 |
|-------------------------------------------------------------------------------------|-------------------------------------------------------------------|---------------------------------------------------------------------------------------------------------------------------------------------------------------------------------------------------------------------------------------------------------------------------------------------------------------------------------------------------------------------------------------------------------------------------------------------------------------------------------------------------------------------------------|
| Function name                                                                       | Input                                                             | Description                                                                                                                                                                                                                                                                                                                                                                                                                                                                                                                     |
| <code>select_compound()</code>                                                      | Fire type, compound, table name                                   | The function returns the EF data for the specified fire type, compound name, and table name. If the specified compound is not found, the function returns the statement 'Compound not found. Search by formula'. For example, 'Eugenol + isoeugenol' is a lumped compound. Therefore, searching for 'eugenol' or 'isoeugenol' individually may not yield results. However, using the <code>select_chemical_formula()</code> function allows users to search by formula, where both lumped and individual compounds will appear. |
| <code>select_chemical_formula()</code>                                              | Fire type, formula, table name                                    | This function returns the emission factor data for a specified fire type, chemical formula, and table name.                                                                                                                                                                                                                                                                                                                                                                                                                     |
| <code>select_pm_data()</code>                                                       | Fire type, table name                                             | This function returns the EFs for the PM constituents for the specified fire type and table name.                                                                                                                                                                                                                                                                                                                                                                                                                               |
| <code>select_ef_pollutant_category()</code>                                         | Fire type, pollutant category                                     | The function returns the recommended EFs for the specified fire type and pollutant category. The pollutant category options can be obtained using the <code>pollutant_category()</code> function.                                                                                                                                                                                                                                                                                                                               |
| <code>compare_lab_field()</code>                                                    | Fire type, compound, table name                                   | This function returns mean EF, mean MCE, and number of observations of laboratory versus field data for the specified fire type, compound name, and table name.                                                                                                                                                                                                                                                                                                                                                                 |
| <code>ef_sorted_by_property()</code>                                                | Fire type, chemical mechanism, model surrogate, property variable | This function returns the NMOC_g EFs sorted by the specified property variable in ascending order. The NMOC_g are filtered by the specified fire type, chemical mechanism, and model surrogate.                                                                                                                                                                                                                                                                                                                                 |
| <code>plot_ef()</code>                                                              | Fire type, compound, table name                                   | This function generates a plot illustrating the recommended EF for a specified fire type, compound, and table name.                                                                                                                                                                                                                                                                                                                                                                                                             |
| <code>boxplot_ef()</code>                                                           | Fire type, compound, table name                                   | This function is identical to <code>plot_ef()</code> but it generates a boxplot of the EF data instead of a single point.                                                                                                                                                                                                                                                                                                                                                                                                       |
| <code>mce_vs_ef()</code>                                                            | Compound, fire type                                               | This function generates a scatter plot of MCE versus EF and returns the linear fit coefficients if the data count is greater than 4 for a specified compound and fire type.                                                                                                                                                                                                                                                                                                                                                     |
| <code>voc_profile()</code>                                                          | Fire type, chemical mechanism                                     | The function returns the mole fraction of the model surrogates of the specified chemical mechanism and fire type.                                                                                                                                                                                                                                                                                                                                                                                                               |



|                                      |                                                              |                                                                                                                                                                                                                                                                                                               |
|--------------------------------------|--------------------------------------------------------------|---------------------------------------------------------------------------------------------------------------------------------------------------------------------------------------------------------------------------------------------------------------------------------------------------------------|
| <code>calc_ohr()</code>              | Fire type, chemical mechanism, summation of NMOC_g EF in ppb | Calculates the OHR based a specified chemical mechanism and fire type. The function requires the summation of NMOC_g EF in ppb as an input for the calculation step, which are then mapped to the model surrogates based on mole fraction.                                                                    |
| <code>calc_vbs()</code>              | Fire type                                                    | Calculates and displays the volatility basis set for the specified fire type.                                                                                                                                                                                                                                 |
| <code>weighted_property()</code>     | Fire type, chemical mechanism                                | Calculates the molecular weight (mm), OH rate constant (kOH), logarithm of saturation concentration (cstar), vapor pressure (vp), and Henry's law constant (hc) weighted by the EF of each model surrogate for the specified chemical mechanism and fire type.                                                |
| <code>speciation_profile()</code>    | Fire type, chemical mechanism, model surrogate               | This function returns the NMOC_g EFs for a specified chemical mechanism and fire type.                                                                                                                                                                                                                        |
| <code>abundant_nmog()</code>         | Fire type, chemical mechanism, property variable             | The function returns the 25 most abundant NMOC_g sorted by EF in ascending order for a specified fire type. The input chemical mechanism model surrogate and property variable will be mapped to the 25 compounds and displayed in the output table.                                                          |
| <code>boxplot_abundant_nmog()</code> | Fire type                                                    | Generates a boxplot displaying the 25 most abundant NMOC_g compounds sorted by EF in ascending order for a specified fire type.                                                                                                                                                                               |
| <code>nmog_with_high_n()</code>      | Fire type, chemical mechanism, property variable             | This function is identical as the <code>abundant_nmog()</code> function, but it outputs the 25 NMOC_g sorted by data count in ascending order.                                                                                                                                                                |
| <code>nmog_with_high_ohr()</code>    | Fire type, chemical mechanism, summation of NMOC_g EF in ppb | The function returns the 25 NMOC_g sorted by OH reactivity (OHR) in ascending order for a specified fire type, chemical mechanism, and summation of all NMOC_g in ppb unit. The input chemical mechanism model surrogate will be mapped to the 25 compounds.                                                  |
| <code>plot_model_surrogate()</code>  | Fire type, chemical mechanism, model surrogate               | Generates a boxplot illustrating NMOC_g versus EF. The NMOC_g compounds are sorted by EF in ascending order and are mapped to the specified model surrogate and chemical mechanism. If there are more than 25 compounds under the model surrogate of the chemical mechanism, it plots the first 25 compounds. |

The following function was demonstrated in the main manuscript. Some of the resultant tables were moved here due to their length.

`select_pm_data(fire_type, table_name)`. This function returns the EFs in all PM subcategories (e.g., PM size, PM organic, PM elemental, PM ion, PM metal, NMOC\_p and PM optical property) for the specified fire type. The tables below are separated by subcategory. The other subcategories are presented in the main manuscript.

using inputs (peat, integrated EF):

| <b>pollutant_category-PM metal</b> |                |                 |                             |                           |                            |
|------------------------------------|----------------|-----------------|-----------------------------|---------------------------|----------------------------|
| <b>mm</b>                          | <b>formula</b> | <b>compound</b> | <b>EF_peat_jayarathne18</b> | <b>EF_russia_watson19</b> | <b>EF_siberia_watson19</b> |
| 58.69                              | Ni             | Nickel          |                             |                           | 3.00E-04                   |
| 63.55                              | Cu             | Copper          | 1.28E-02                    | 2.30E-03                  | 8.40E-03                   |
| 74.92                              | As             | Arsenic         | 1.00E-04                    | 2.00E-04                  | 1.00E-04                   |
| 78.97                              | Se             | Selenium        |                             | 2.00E-04                  | 4.00E-04                   |
| 112.41                             | Cd             | Cadmium         |                             | 1.10E-03                  | 5.00E-04                   |
| 121.76                             | Sb             | Antimony        |                             |                           |                            |
| 207.00                             | Pb             | Lead            | 7.00E-04                    | 1.10E-03                  | 8.00E-04                   |
| 55.84                              | Fe             | Fe              | 4.70E-03                    | 2.23E-02                  | 8.60E-03                   |
| 65.40                              | Zn             | Zn              | 6.90E-03                    | 1.40E-03                  | 1.70E-03                   |
| 137.33                             | Ba             | Ba              | 2.00E-04                    | 5.10E-03                  | 3.90E-03                   |
| 26.98                              | Al             | Aluminum        |                             | 6.27E-02                  | 2.42E-02                   |
| 28.09                              | Si             | Silicon         |                             | 4.20E-03                  | 4.70E-03                   |
| 30.97                              | P              | Phosphorus      |                             | 1.00E-04                  |                            |
| 32.07                              | S              | Sulfur          |                             | 1.48E-02                  | 1.86E-02                   |
| 44.96                              | Sc             | Scandium        |                             | 1.36E-02                  | 1.79E-02                   |
| 47.87                              | Ti             | Titanium        |                             | 2.20E-03                  | 1.40E-03                   |
| 50.94                              | V              | Vanadium        |                             |                           | 1.00E-04                   |
| 52.00                              | Cr             | Chromium        |                             | 3.00E-04                  | 3.00E-04                   |
| 54.94                              | Mn             | Manganese       |                             | 1.00E-03                  | 9.00E-04                   |
| 159.81                             | Br             | Bromine         |                             | 3.00E-04                  | 2.60E-03                   |

|        |    |            |  |          |          |
|--------|----|------------|--|----------|----------|
| 85.47  | Rb | Rubidium   |  | 6.00E-04 | 2.00E-04 |
| 87.60  | Sr | Strontium  |  | 1.40E-03 | 1.50E-03 |
| 88.91  | Y  | Yttrium    |  | 9.00E-04 | 1.00E-03 |
| 91.22  | Zr | Zirconium  |  | 1.10E-03 | 1.80E-03 |
| 92.91  | Nb | Niobium    |  | 2.00E-04 | 1.00E-04 |
| 96.00  | Mo | Molybdenum |  | 8.00E-04 | 8.00E-04 |
| 107.87 | Ag | Silver     |  | 2.00E-04 | 1.10E-03 |
| 114.82 | In | Indium     |  | 1.20E-03 | 5.00E-04 |
| 118.71 | Sn | Tin        |  | 9.00E-04 | 3.00E-03 |
| 132.91 | Cs | Cesium     |  | 9.70E-03 | 2.10E-03 |
| 138.91 | La | Lanthanum  |  | 1.97E-02 | 1.62E-02 |
| 183.80 | W  | Wolfram    |  | 1.80E-03 | 8.00E-04 |
| 196.97 | Au | Gold       |  | 8.00E-04 | 5.00E-04 |
| 238.03 | U  | Uranium    |  | 6.00E-04 | 1.00E-03 |

| pollutant_category-PM metal (continued) |         |          |                             |                                  |                      |
|-----------------------------------------|---------|----------|-----------------------------|----------------------------------|----------------------|
| mm                                      | formula | compound | EF_northern_alaska_watson19 | EF_evergladesNP_florida_watson19 | EF_malaysia_watson19 |
| 58.69                                   | Ni      | Nickel   | 1.00E-04                    |                                  | 4.00E-04             |
| 63.55                                   | Cu      | Copper   | 4.90E-03                    | 1.60E-03                         | 1.60E-03             |
| 74.92                                   | As      | Arsenic  | 1.00E-04                    | 1.00E-04                         |                      |
| 78.97                                   | Se      | Selenium | 2.00E-04                    | 6.00E-04                         | 3.00E-04             |
| 112.41                                  | Cd      | Cadmium  |                             | 1.00E-03                         |                      |
| 121.76                                  | Sb      | Antimony | 6.00E-04                    | 1.00E-04                         | 1.20E-03             |
| 207.00                                  | Pb      | Lead     |                             | 5.00E-04                         | 5.00E-04             |
| 55.84                                   | Fe      | Fe       | 8.30E-03                    | 4.60E-03                         | 1.36E-02             |
| 65.40                                   | Zn      | Zn       | 3.60E-03                    | 7.00E-04                         | 8.00E-04             |
| 137.33                                  | Ba      | Ba       |                             |                                  |                      |
| 26.98                                   | Al      | Aluminum | 5.60E-03                    | 3.50E-03                         | 9.40E-03             |

|        |    |            |          |          |          |
|--------|----|------------|----------|----------|----------|
| 28.09  | Si | Silicon    | 1.30E-03 | 2.20E-03 | 1.10E-03 |
| 30.97  | P  | Phosphorus |          |          |          |
| 32.07  | S  | Sulfur     | 4.20E-03 | 9.90E-02 | 1.43E-02 |
| 44.96  | Sc | Scandium   |          |          |          |
| 47.87  | Ti | Titanium   | 8.00E-04 | 8.00E-04 | 1.50E-03 |
| 50.94  | V  | Vanadium   |          | 1.00E-04 |          |
| 52.00  | Cr | Chromium   | 1.00E-04 |          | 3.00E-04 |
| 54.94  | Mn | Manganese  | 5.00E-04 | 5.00E-04 | 1.60E-03 |
| 159.81 | Br | Bromine    | 1.10E-03 | 5.90E-03 | 2.50E-03 |
| 85.47  | Rb | Rubidium   | 5.00E-04 | 2.00E-04 | 1.00E-04 |
| 87.60  | Sr | Strontium  | 9.00E-04 | 1.30E-03 | 4.00E-04 |
| 88.91  | Y  | Yttrium    | 7.00E-04 | 7.00E-04 | 4.00E-04 |
| 91.22  | Zr | Zirconium  | 7.00E-04 | 9.00E-04 | 6.00E-04 |
| 92.91  | Nb | Niobium    |          | 5.00E-04 | 4.00E-04 |
| 96.00  | Mo | Molybdenum | 3.00E-04 | 4.00E-04 | 6.00E-04 |
| 107.87 | Ag | Silver     |          | 2.00E-04 | 6.00E-04 |
| 114.82 | In | Indium     | 2.00E-04 | 1.50E-03 | 5.00E-04 |
| 118.71 | Sn | Tin        | 1.50E-03 | 1.70E-03 | 7.00E-04 |
| 132.91 | Cs | Cesium     | 1.80E-03 | 4.90E-03 | 3.60E-03 |
| 138.91 | La | Lanthanum  | 8.50E-03 | 1.10E-02 | 6.00E-03 |
| 183.80 | W  | Wolfram    | 5.00E-04 | 2.30E-03 |          |
| 196.97 | Au | Gold       |          | 6.00E-04 | 1.00E-04 |
| 238.03 | U  | Uranium    | 9.00E-04 | 8.00E-04 | 6.00E-04 |

| pollutant_category- NMOC_p |         |                              |                                 |                                      |                          |
|----------------------------|---------|------------------------------|---------------------------------|--------------------------------------|--------------------------|
| mm                         | formula | compound                     | EF_northern_<br>alaska watson19 | EF_evergladesNP_<br>florida watson19 | EF_malaysia_<br>watson19 |
| 178.23                     | C14H10  | Anthracene                   | 1.00E-04                        |                                      |                          |
| 202.25                     | C16H10  | Fluoranthene                 | 4.00E-04                        |                                      |                          |
| 202.25                     | C16H10  | Pyrene                       | 7.00E-04                        |                                      |                          |
| 216.28                     | C17H12  | Methylfluoranthene           | 5.00E-04                        |                                      |                          |
| 192.25                     | C15H12  | 9-Methylanthracene           |                                 |                                      |                          |
| 226.30                     | C18H10  | Benzo(ghi)fluoranthene       | 1.00E-04                        |                                      |                          |
| 226.30                     | C18H10  | Cyclopenta(cd)pyrene         | 1.00E-04                        |                                      |                          |
| 228.30                     | C18H12  | Benz(a)anthracene            | 3.00E-04                        |                                      |                          |
| 228.30                     | C18H12  | Chrysene                     | 7.00E-04                        |                                      |                          |
| 242.30                     | C19H14  | 1-Methylchrysene             | 2.00E-04                        |                                      |                          |
| 234.30                     | C18H18  | Retene                       | 4.00E-04                        |                                      |                          |
| 252.30                     | C20H12  | Benzo(b)fluoranthene         | 3.00E-04                        |                                      |                          |
| 252.30                     | C20H12  | Benzo(k)fluoranthene         |                                 |                                      |                          |
| 252.30                     | C20H12  | Benzo(j)fluoranthene         |                                 |                                      |                          |
| 252.30                     | C20H12  | Benzo(e)pyrene               | 4.00E-04                        |                                      |                          |
| 252.30                     | C20H12  | Benzo(a)pyrene               | 1.00E-04                        |                                      |                          |
| 252.30                     | C20H12  | Perylene                     | 1.00E-04                        |                                      |                          |
| 276.30                     | C22H12  | Indeno(1,2,3-cd)pyrene       |                                 |                                      |                          |
| 276.30                     | C22H12  | Benzo(ghi)perylene           | 2.00E-04                        |                                      |                          |
| 278.30                     | C22H14  | Dibenz[a,h]anthracene        | 1.00E-04                        |                                      |                          |
| 278.30                     | C22H14  | Picene                       | 2.00E-04                        |                                      |                          |
| 306.40                     | C24H18  | Triphenylbenzene             |                                 |                                      |                          |
| 370.65                     | C27H46  | 17(H)-22,29,30-Trisnorhopane | 4.30E-03                        |                                      |                          |
| 268.50                     | C19H40  | Pristane                     | 1.24E-02                        |                                      |                          |

|        |         |                  |          |          |          |
|--------|---------|------------------|----------|----------|----------|
| 254.50 | C18H38  | Norpristane      | 4.30E-03 |          |          |
| 282.50 | C20H42  | Phytane          |          |          |          |
| 422.80 | C30H62  | Squalane         | 1.62E-02 |          |          |
| 254.50 | C18H38  | Octadecane       | 4.80E-03 |          |          |
| 268.50 | C19H40  | Nonadecane       | 1.36E-02 |          |          |
| 282.50 | C20H42  | Eicosane         | 2.73E-02 |          |          |
| 296.60 | C21H44  | Heneicosane      | 4.71E-02 |          |          |
| 310.60 | C22H46  | Docosane         | 5.33E-02 |          |          |
| 324.60 | C23H48  | Tricosane        | 5.95E-02 |          |          |
| 338.70 | C24H50  | Tetracosane      | 5.08E-02 |          |          |
| 352.70 | C25H52  | Pentacosane      | 6.70E-02 |          |          |
| 366.70 | C26H54  | Hexacosane       | 5.08E-02 |          |          |
| 380.70 | C27H56  | Heptacosane      | 6.82E-02 |          |          |
| 394.80 | C28H58  | Octacosane       | 5.95E-02 |          |          |
| 408.80 | C29H60  | Nonacosane       | 8.06E-02 |          |          |
| 422.80 | C30H62  | triacontane      | 5.83E-02 |          |          |
| 436.80 | C31H64  | Hentriacontane   | 8.31E-02 |          |          |
| 450.90 | C32H66  | Dotriacontane    | 3.76E-02 |          |          |
| 464.90 | C33H68  | Tritriacontane   | 3.51E-02 |          |          |
| 478.90 | C34H70  | Tetratriacontane | 1.55E-02 |          |          |
| 492.90 | C35H72  | Pentatriacontane | 8.20E-03 |          |          |
| 162.14 | C6H10O5 | Levogluconan     | 5.70E-01 | 1.58E+01 | 2.63E+00 |
| 521.00 | C37H76  | Heptatriacontane | 1.02E-02 |          |          |
| 535.00 | C38H78  | Octriacontane    | 3.10E-02 |          |          |
| 549.10 | C39H80  | Nonatriacontane  | 1.22E-02 |          |          |
| 162.14 | C6H10O5 | Mannosan         | 1.15E-02 | 1.93E+00 | 2.06E-01 |
| 162.14 | C6H10O5 | Galactosan       | 1.70E-03 |          |          |

|        |                                                                                                |                              |          |          |          |
|--------|------------------------------------------------------------------------------------------------|------------------------------|----------|----------|----------|
| 180.16 | C <sub>6</sub> H <sub>12</sub> O <sub>6</sub> /C <sub>12</sub> H <sub>24</sub> O <sub>11</sub> | Galactose/Maltitol           |          | 1.58E-02 | 1.10E-03 |
| 92.09  | C <sub>3</sub> H <sub>8</sub> O <sub>3</sub>                                                   | Glycerol                     |          | 1.21E+00 | 7.85E-02 |
| 182.17 | C <sub>6</sub> H <sub>14</sub> O <sub>6</sub>                                                  | Mannitol                     |          | 1.58E-02 |          |
| 182.17 | C <sub>9</sub> H <sub>10</sub> O <sub>4</sub>                                                  | Syringaldehyde               | 1.15E-02 |          |          |
| 168.15 | C <sub>8</sub> H <sub>8</sub> O <sub>4</sub>                                                   | Vanillic acid                | 4.59E-02 |          |          |
| 198.17 | C <sub>9</sub> H <sub>10</sub> O <sub>5</sub>                                                  | Syringic acid                | 2.10E-02 |          |          |
| 386.70 | C <sub>27</sub> H <sub>46</sub> O                                                              | Cholesterol                  |          |          |          |
| 412.70 | C <sub>29</sub> H <sub>48</sub> O                                                              | Stigmasterol                 | 2.70E-03 |          |          |
| 414.70 | C <sub>29</sub> H <sub>50</sub> O                                                              | b-Sitosterol                 | 6.60E-03 |          |          |
| 400.70 | C <sub>28</sub> H <sub>48</sub> O                                                              | Campesterol                  | 3.60E-03 |          |          |
| 388.67 | C <sub>27</sub> H <sub>48</sub> O                                                              | Cholestanol and coprostanol  |          |          |          |
| 416.70 | C <sub>29</sub> H <sub>52</sub> O                                                              | Stigmastanol                 |          |          |          |
| 370.65 | C <sub>27</sub> H <sub>46</sub>                                                                | 17(H)-22,29,30-Trisnorhopane |          |          |          |
| 398.71 | C <sub>29</sub> H <sub>50</sub>                                                                | 17(H)-21(H)-30-Norhopane     | 1.05E-02 |          |          |
| 412.73 | C <sub>30</sub> H <sub>52</sub>                                                                | 17(H)-21(H)-Hopane           | 2.70E-03 |          |          |
| 178.23 | C <sub>14</sub> H <sub>10</sub>                                                                | Anthracene                   | 1.00E-04 |          |          |

| pollutant_category- NMOC_p (continued) |                                 |                        |                                 |                                      |                          |
|----------------------------------------|---------------------------------|------------------------|---------------------------------|--------------------------------------|--------------------------|
| mm                                     | formula                         | compound               | EF_northern_<br>alaska_watson19 | EF_evergladesNP_<br>florida_watson19 | EF_malaysia_<br>watson19 |
| 178.23                                 | C <sub>14</sub> H <sub>10</sub> | Anthracene             |                                 |                                      |                          |
| 202.25                                 | C <sub>16</sub> H <sub>10</sub> | Fluoranthene           |                                 |                                      |                          |
| 202.25                                 | C <sub>16</sub> H <sub>10</sub> | Pyrene                 |                                 |                                      |                          |
| 216.28                                 | C <sub>17</sub> H <sub>12</sub> | Methylfluoranthene     |                                 |                                      |                          |
| 192.25                                 | C <sub>15</sub> H <sub>12</sub> | 9-Methylanthracene     |                                 |                                      |                          |
| 226.30                                 | C <sub>18</sub> H <sub>10</sub> | Benzo(ghi)fluoranthene |                                 |                                      |                          |

|        |        |                              |  |  |  |
|--------|--------|------------------------------|--|--|--|
| 226.30 | C18H10 | Cyclopenta(cd)pyrene         |  |  |  |
| 228.30 | C18H12 | Benz(a)anthracene            |  |  |  |
| 228.30 | C18H12 | Chrysene                     |  |  |  |
| 242.30 | C19H14 | 1-Methylchrysene             |  |  |  |
| 234.30 | C18H18 | Retene                       |  |  |  |
| 252.30 | C20H12 | Benzo(b)fluoranthene         |  |  |  |
| 252.30 | C20H12 | Benzo(k)fluoranthene         |  |  |  |
| 252.30 | C20H12 | Benzo(j)fluoranthene         |  |  |  |
| 252.30 | C20H12 | Benzo(e)pyrene               |  |  |  |
| 252.30 | C20H12 | Benzo(a)pyrene               |  |  |  |
| 252.30 | C20H12 | Perylene                     |  |  |  |
| 276.30 | C22H12 | Indeno(1,2,3-cd)pyrene       |  |  |  |
| 276.30 | C22H12 | Benzo(ghi)perylene           |  |  |  |
| 278.30 | C22H14 | Dibenz[a,h]anthracene        |  |  |  |
| 278.30 | C22H14 | Picene                       |  |  |  |
| 306.40 | C24H18 | Triphenylbenzene             |  |  |  |
| 370.65 | C27H46 | 17(H)-22,29,30-Trisnorhopane |  |  |  |
| 268.50 | C19H40 | Pristane                     |  |  |  |
| 254.50 | C18H38 | Norpristane                  |  |  |  |
| 282.50 | C20H42 | Phytane                      |  |  |  |
| 422.80 | C30H62 | Squalane                     |  |  |  |
| 254.50 | C18H38 | Octadecane                   |  |  |  |
| 268.50 | C19H40 | Nonadecane                   |  |  |  |
| 282.50 | C20H42 | Eicosane                     |  |  |  |
| 296.60 | C21H44 | Heneicosane                  |  |  |  |
| 310.60 | C22H46 | Docosane                     |  |  |  |
| 324.60 | C23H48 | Tricosane                    |  |  |  |



|        |                       |                    |          |          |          |
|--------|-----------------------|--------------------|----------|----------|----------|
| 338.70 | C24H50                | Tetracosane        |          |          |          |
| 352.70 | C25H52                | Pentacosane        |          |          |          |
| 366.70 | C26H54                | Hexacosane         |          |          |          |
| 380.70 | C27H56                | Heptacosane        |          |          |          |
| 394.80 | C28H58                | Octacosane         |          |          |          |
| 408.80 | C29H60                | Nonacosane         |          |          |          |
| 422.80 | C30H62                | Triacontane        |          |          |          |
| 436.80 | C31H64                | Hentriacontane     |          |          |          |
| 450.90 | C32H66                | Dotriacontane      |          |          |          |
| 464.90 | C33H68                | Tritriacontane     |          |          |          |
| 478.90 | C34H70                | Tetratriacontane   |          |          |          |
| 492.90 | C35H72                | Pentatriacontane   |          |          |          |
| 162.14 | C6H10O5               | Levoglucosan       | 3.42E+00 | 3.93E-01 | 7.81E-01 |
| 521.00 | C37H76                | Heptatriacontane   |          |          |          |
| 535.00 | C38H78                | Octriacontane      |          |          |          |
| 549.10 | C39H80                | Nonatriacontane    |          |          |          |
| 162.14 | C6H10O5               | Mannosan           | 6.94E-01 | 7.40E-03 | 2.04E-02 |
| 162.14 | C6H10O5               | Galactosan         |          |          |          |
| 180.16 | C6H12O6/C<br>12H24O11 | Galactose/Maltitol |          |          |          |
| 92.09  | C3H8O3                | Glycerol           | 1.82E-01 |          |          |
| 182.17 | C6H14O6               | Mannitol           |          |          | 1.50E-03 |
| 182.17 | C9H10O4               | Syringaldehyde     |          |          |          |
| 168.15 | C8H8O4                | Vanillic acid      |          |          |          |
| 198.17 | C9H10O5               | Syringic acid      |          |          |          |
| 386.70 | C27H46O               | Cholesterol        |          |          |          |
| 412.70 | C29H48O               | Stigmasterol       |          |          |          |
| 414.70 | C29H50O               | b-Sitosterol       |          |          |          |

|        |         |                              |  |  |  |
|--------|---------|------------------------------|--|--|--|
| 400.70 | C28H48O | Campesterol                  |  |  |  |
| 388.67 | C27H48O | Cholesterol and coprostanol  |  |  |  |
| 416.70 | C29H52O | Stigmastanol                 |  |  |  |
| 370.65 | C27H46  | 17(H)-22,29,30-Trisnorhopane |  |  |  |
| 398.71 | C29H50  | 17(H)-21(H)-30-Norhopane     |  |  |  |
| 412.73 | C30H52  | 17(H)-21(H)-Hopane           |  |  |  |
| 178.23 | C14H10  | Anthracene                   |  |  |  |

## References

- Akagi, S. K., Yokelson, R. J., Wiedinmyer, C., Alvarado, M. J., Reid, J. S., Karl, T., Crounse, J. D., and Wennberg, P. O.: Emission factors for open and domestic biomass burning for use in atmospheric models, *Atmospheric Chemistry and Physics*, 11, 4039–4072, <https://doi.org/10.5194/acp-11-4039-2011>, 2011.
- Andreae, M. O.: Emission of trace gases and aerosols from biomass burning – an updated assessment, *Atmospheric Chemistry and Physics*, 19, 8523–8546, <https://doi.org/10.5194/acp-19-8523-2019>, 2019.
- Bertschi, I. T., Yokelson, R. J., Ward, D. E., Christian, T. J., and Hao, W. M.: Trace gas emissions from the production and use of domestic biofuels in Zambia measured by open-path Fourier transform infrared spectroscopy, *Journal of Geophysical Research: Atmospheres*, 108, <https://doi.org/10.1029/2002JD002158>, 2003.
- Bey, I., Jacob, D. J., Yantosca, R. M., Logan, J. A., Field, B. D., Fiore, A. M., Li, Q., Liu, H. Y., Mickley, L. J., and Schultz, M. G.: Global modeling of tropospheric chemistry with assimilated meteorology: Model description and evaluation, *Journal of Geophysical Research: Atmospheres*, 106, 23073–23095, <https://doi.org/10.1029/2001JD000807>, 2001.
- Burling, I., Yokelson, R., Akagi, S., Urbanski, S., Wold, C., Griffith, D., Johnson, T., Reardon, J., and Weise, D.: Airborne and ground-based measurements of the trace gases and particles emitted by prescribed fires in the United States, *Atmospheric Chemistry and Physics*, 11, 12197–12216, <https://doi.org/10.5194/acp-11-12197-2011>, 2011.
- Carter, T. S., Heald, C. L., Kroll, J. H., Apel, E. C., Blake, D., Coggon, M., Edtbauer, A., Gkatzelis, G., Hornbrook, R. S., Peischl, J., Pfannerstill, E. Y., Piel, F., Reijrink, N. G., Ringsdorf, A., Warneke, C., Williams, J., Wisthaler, A., and Xu, L.: An improved representation of fire non-methane organic gases (NMOGs) in models: emissions to reactivity, *Atmospheric Chemistry and Physics*, 22, 12093–12111, <https://doi.org/10.5194/acp-22-12093-2022>, 2022.
- Carter, W. P. L.: Development of the SAPRC-07 Chemical Mechanism, *Atmospheric Environment*, 44, 5324–5335, <https://doi.org/10.1016/j.atmosenv.2010.01.026>, 2010.
- Carter, W. P. L.: Documentation of the SAPRC-16 Mechanism Generation System, Draft interim report to California Air Resources Board Contract 11-761. May 25. Available at <https://intra.engr.ucr.edu/~carter/SAPRC/18/MechGen.pdf>, 2019.
- Carter, W. P. L.: Documentation of the SAPRC-18 Mechanism, Report to California Air Resources Board Contract No. 11-761, May 29. Available at <https://intra.cert.ucr.edu/~carter/SAPRC/18/S18doc.pdf>, 2020.
- Carter, W. P. L.: Documentation of the SAPRC-22 Mechanisms, Report to the California Air Resources Board contract no. 21AQP011, May 15. Available at <https://intra.cert.ucr.edu/~carter/SAPRC/22/S22doc.pdf>, 2023a.

Carter, W. P. L.: Development of an Improved Chemical Speciation Database for Processing Emissions of Volatile Organic Compounds for Air Quality Models, Available at <https://intra.engr.ucr.edu/~carter/emitdb/>, 2023b.

Carter, W. P. L.: The SAPRC Mechanism Generation System, Available at <https://intra.cert.ucr.edu/~carter/SAPRC/22/MechGen.pdf>, In Prep.

Christian, T., Kleiss, B., Yokelson, R., Holzinger, R., Crutzen, P., Hao, W., Saharjo, B., and Ward, D.: Comprehensive laboratory measurements of biomass-burning emissions: 1. Emissions from Indonesian, African, and other fuels, *Journal of Geophysical Research: Atmospheres*, 108, <https://doi.org/10.1029/2003JD003704>, 2003.

Emmons, L. K., Schwantes, R. H., Orlando, J. J., Tyndall, G., Kinnison, D., Lamarque, J.-F., Marsh, D., Mills, M. J., Tilmes, S., Bardeen, C., Buchholz, R. R., Conley, A., Gettelman, A., Garcia, R., Simpson, I., Blake, D. R., Meinardi, S., and Pétron, G.: The Chemistry Mechanism in the Community Earth System Model Version 2 (CESM2), *Journal of Advances in Modeling Earth Systems*, 12, e2019MS001882, <https://doi.org/10.1029/2019MS001882>, 2020.

Hatch, L. E., Luo, W., Pankow, J. F., Yokelson, R. J., Stockwell, C. E., and Barsanti, K. C.: Identification and quantification of gaseous organic compounds emitted from biomass burning using two-dimensional gas chromatography-time-of-flight mass spectrometry, *Atmospheric Chemistry and Physics*, 15, 1865–1899, <https://doi.org/10.5194/acp-15-1865-2015>, 2015.

Hutzell, W. T., Luecken, D. J., Appel, K. W., and Carter, W. P. L.: Interpreting predictions from the SAPRC07 mechanism based on regional and continental simulations, *Atmospheric Environment*, 46, 417–429, <https://doi.org/10.1016/j.atmosenv.2011.09.030>, 2012.

NIST Chemistry WebBook: <https://webbook.nist.gov/chemistry/>, last access: 29 January 2024.

Kim, S., Chen, J., Cheng, T., Gindulyte, A., He, J., He, S., Li, Q., Shoemaker, B. A., Thiessen, P. A., Yu, B., Zaslavsky, L., Zhang, J., and Bolton, E. E.: PubChem in 2021: new data content and improved web interfaces, *Nucleic Acids Research*, 49, D1388–D1395, <https://doi.org/10.1093/nar/gkaa971>, 2021.

Kim, S., Chen, J., Cheng, T., Gindulyte, A., He, J., He, S., Li, Q., Shoemaker, B. A., Thiessen, P. A., Yu, B., Zaslavsky, L., Zhang, J., and Bolton, E. E.: PubChem 2023 update, *Nucleic Acids Research*, 51, D1373–D1380, <https://doi.org/10.1093/nar/gkac956>, 2023.

Koss, A. R., Sekimoto, K., Gilman, J. B., Selimovic, V., Coggon, M. M., Zarzana, K. J., Yuan, B., Lerner, B. M., Brown, S. S., Jimenez, J. L., Krechmer, J., Roberts, J. M., Warneke, C., Yokelson, R. J., and de Gouw, J.: Non-methane organic gas emissions from biomass burning: identification, quantification, and emission factors from PTR-ToF during the FIREX 2016 laboratory experiment, *Atmospheric Chemistry and Physics*, 18, 3299–3319, <https://doi.org/10.5194/acp-18-3299-2018>, 2018.

Li, M., Zhang, Q., Streets, D. G., He, K. B., Cheng, Y. F., Emmons, L. K., Huo, H., Kang, S. C., Lu, Z., Shao, M., Su, H., Yu, X., and Zhang, Y.: Mapping Asian anthropogenic emissions of non-

methane volatile organic compounds to multiple chemical mechanisms, *Atmospheric Chemistry and Physics*, 14, 5617–5638, <https://doi.org/10.5194/acp-14-5617-2014>, 2014.

May, A. A., McMeeking, G. R., Lee, T., Taylor, J. W., Craven, J. S., Burling, I., Sullivan, A. P., Akagi, S., Collett, J. L., Flynn, M., Coe, H., Urbanski, S. P., Seinfeld, J. H., Yokelson, R. J., and Kreidenweis, S. M.: Aerosol emissions from prescribed fires in the United States: A synthesis of laboratory and aircraft measurements, *Journal of Geophysical Research-Atmospheres*, 119, 11826–11849, <https://doi.org/10.1002/2014jd021848>, 2014.

Nannoolal, Y., Rarey, J., and Ramjugernath, D.: Estimation of pure component properties: Part 3. Estimation of the vapor pressure of non-electrolyte organic compounds via group contributions and group interactions, *Fluid Phase Equilibria*, 269, 117–133, <https://doi.org/10.1016/j.fluid.2008.04.020>, 2008.

Pence, H. E. and Williams, A.: ChemSpider: An Online Chemical Information Resource, *J. Chem. Educ.*, 87, 1123–1124, <https://doi.org/10.1021/ed100697w>, 2010.

Radke, L. F., Hegg, D. A., Hobbs, P. V., Nance, J. D., Lyons, J. H., Laursen, K. K., Weiss, R. E., Riggan, P. J., and Ward, D. E.: Particulate and trace gas emissions from large biomass fires in North America, in: *Global biomass burning: atmospheric, climatic, and biospheric implications*, MIT Press, 209–224, 1991.

Selimovic, V., Yokelson, R. J., Warneke, C., Roberts, J. M., de Gouw, J., Reardon, J., and Griffith, D. W. T.: Aerosol optical properties and trace gas emissions by PAX and OP-FTIR for laboratory-simulated western US wildfires during FIREX, *Atmospheric Chemistry and Physics*, 18, 2929–2948, <https://doi.org/10.5194/acp-18-2929-2018>, 2018.

Stockwell, C. E., Veres, P. R., Williams, J., and Yokelson, R. J.: Characterization of biomass burning emissions from cooking fires, peat, crop residue, and other fuels with high-resolution proton-transfer-reaction time-of-flight mass spectrometry, *Atmospheric Chemistry and Physics*, 15, 845–865, <https://doi.org/10.5194/acp-15-845-2015>, 2015.

Topping, D., Barley, M., Bane, M. K., Higham, N., Aumont, B., Dingle, N., and McFiggans, G.: UManSysProp v1.0: an online and open-source facility for molecular property prediction and atmospheric aerosol calculations, *Geoscientific Model Development*, 9, 899–914, <https://doi.org/10.5194/gmd-9-899-2016>, 2016.

US EPA: Estimation Programs Interface Suite™ for Microsoft® Windows, v 4.11 or insert version used]. United States Environmental Protection Agency, Washington, DC, USA. 2023.

Yokelson, R. J., Susott, R., Ward, D. E., Reardon, J., and Griffith, D. W. T.: Emissions from smoldering combustion of biomass measured by open-path Fourier transform infrared spectroscopy, *Journal of Geophysical Research: Atmospheres*, 102, 18865–18877, <https://doi.org/10.1029/97JD00852>, 1997.

Yokelson, R. J., Christian, T. J., Karl, T. G., and Guenther, A.: The tropical forest and fire emissions experiment: laboratory fire measurements and synthesis of campaign data, *Atmos. Chem. Phys.*, 8, 3509–3527, <https://doi.org/10.5194/acp-8-3509-2008>, 2008.

Yokelson, R. J., Burling, I. R., Gilman, J. B., Warneke, C., Stockwell, C. E., de Gouw, J., Akagi, S. K., Urbanski, S. P., Veres, P., Roberts, J. M., Kuster, W. C., Reardon, J., Griffith, D. W. T., Johnson, T. J., Hosseini, S., Miller, J. W., Cocker, D. R., Jung, H., and Weise, D. R.: Coupling field and laboratory measurements to estimate the emission factors of identified and unidentified trace gases for prescribed fires, *Atmospheric Chemistry and Physics*, 13, 89–116, <https://doi.org/10.5194/acp-13-89-2013>, 2013.
