# Supplementary material for: NEIVAv1.0: Next-generation Emissions InVentory expansion of Akagi et al. version 1.0
Source: Copernicus journal article supplement (doi:10.5194/egusphere-2024-633), 2024-05-07
Supplement: Supplementary file 3 [file Recommended_ER.xlsx]

## Sheet: Sheet1
mm	formula	compound	pollutant_category	AVG_savanna_ppb/ppm CO	AVG_boreal_forest_ppb/ppm CO	AVG_tropical_forest_ppb/ppm CO	AVG_temperate_forest_ppb/ppm CO	AVG_peat_ppb/ppm CO	AVG_chaparral_ppb/ppm CO	AVG_open_cooking_ppb/ppm CO	AVG_cookstove_ppb/ppm CO	AVG_dung_burning_ppb/ppm CO	AVG_charcoal_making_ppb/ppm CO	AVG_charcoal_burning_ppb/ppm CO	AVG_pasture_maintenance_ppb/ppm CO	AVG_crop_residue_ppb/ppm CO	AVG_garbage_burning_ppb/ppm CO	id
2	H2	Hydrogen	inorganic gas	294.009		424.065	296.183	75.7602								504.115	24.4859	InChI=1S/H2/h1H
16.04	CH4	Methane	methane	60.9757	83.1071	73.7808	86.3122	86.1393	67.412	108.14	120.192	128.431	394.666	39.7738	113.816	64.9941	102.764	InChI=1S/CH4/h1H4
17	NH3	Ammonia	inorganic gas	13.4128	24.1062	19.728	18.2386	45.0534	22.484	12.3403	70.8717	38.1883	56.2475	4.71455	18.2628	27.7008	21.7819	InChI=1S/H3N/h1H3
28	CO	Carbon monoxide	inorganic gas	1000	1000	1000	1000	1000	1000	1000	1000	1000	1000	1000	1000	1000	1000	InChI=1S/CO/c1-2
30	NO	Nitric oxide	inorganic gas	20.239	8.50388	7.58387	7.63145	1.33108	16.1427	15.8843	23.509	20.2972	0.908881	17.8946	2.20483	15.5973	14.5216	InChI=1S/NO/c1-2
30		Nitrogen oxides(NOx as NO)	inorganic gas	39.2425	11.2396	21.4876	16.0543	3.84555	33.9499	19.6835	30	23.7727	0.792358	8.64834	4.69905	33.2767	41.3566	NOx_as_NO
34	H2S	Hydrogen sulfide	inorganic gas				0.277409	0.930845	0.0679743			1.51676				0.290783		InChI=1S/H2S/h1H2
34	H2O2	Hydrogen peroxide	inorganic gas	1.3327			1.77444		4.68645							1.14851		InChI=1S/H2O2/c1-2/h1-2H
43	CHNO	Isocyanic acid	inorganic gas	8.44621	0.537883		2.74819	1.66206	2.95707			5.44747				5.31043	1.61051	InChI=1S/CHNO/c2-1-3/h2H
44	N2O	Nitrous oxide	inorganic gas	1.10057	1.29831		1.02795		2.38875					0.555372				InChI=1S/N2O/c1-2-3
44	CO2	Carbon dioxide	inorganic gas	12895	10195.2	9335.38	10486	4447.42	15756.2	12653.2	19302.8	6809.24	4122.56	9634.59	7256.53	15940.6	18374.6	InChI=1S/CO2/c2-1-3
46	NO2	Nitrogen dioxide	inorganic gas	19.5469	5.58556	19.5092	8.9051	1.46833	9.34867	7.00283	7.17375	5.13167		1.50913	2.42651	20.7226	27.3515	InChI=1S/NO2/c2-1-3
47	HNO2	Nitrous acid	inorganic gas	3.67088	1.51418	6.34678	2.34792	0.588083	4.9407	3.21258	3.70291	1.52111		1.24569	0.734456	3.65226	2.87369	InChI=1S/HNO2/c2-1-3/h(H,2,3)
48	HCl	Hydrochloric acid	inorganic gas	1.7028	0.281881		0.323357	0.0545998	0.763614	1.04326	0.152963	0.158794				2.64125	48.2095	InChI=1S/ClH/h1H
64	SO2	Sulfur dioxide	inorganic gas	5.10435	2.4547	1.59314	4.33048	4.0125	3.63495	2.80349		5.85928			1.42108	9.46819	5.92477	InChI=1S/O2S/c1-3-2
68	C3O2	Carbon suboxide	inorganic gas				0.0158337	0.00250339	0.00946181		0.0139693	0.00219502				0.00680131	0.00395062	InChI=1S/C3O2/c4-2-1-3-5
79	HNO4	Peroxynitric acid	inorganic gas		0.00352737													InChI=1S/HNO4/c2-1(3)5-4/h4H
93	NO2Cl	Nitryl chloride	inorganic gas	0.000383085			0.000522741									0.000665889		InChI=1S/ClNO2/c1-3(2)4
106	C2H3O2Cl	Chloroacetic acid	inorganic gas	0.000871258			0.00108464									0.000501288		InChI=1S/C2H3ClO2/c3-1-2(4)5/h1H2,(H,4,5)
108	N2O5	Dinitrogen pentoxide	inorganic gas	0.00133873			0.00104296									0.000808744		InChI=1S/N2O5/c3-1(4)7-2(5)6
201	Hg	Gaseous elemental mercury	inorganic gas		0.000120615			0.000216797										InChI=1S/Hg
26	C2H2	Acetylene	NMOC_g	4.70289	3.68322	4.25863	3.73021	0.806779	5.62394	13.6728	13.1115	11.4558	1.6134	2.61268	1.4509	4.42942	12.3741	InChI=1S/C2H2/c1-2/h1-2H
27	HCN	Hydrogen cyanide	NMOC_g	6.21686	9.56071	3.96359	5.33156	21.5803	4.17709	3.24448	5.96198	24.1385	0.836577		3.39529	5.7773	6.02397	InChI=1S/CHN/c1-2/h1H
28	C2H4	Ethene	NMOC_g	14.8786	16.536	9.55206	14.184	6.78749	14.4762	21.4328	22.922	27.2685	17.1968	2.54397	9.43206	15.452	39.6904	InChI=1S/C2H4/c1-2/h1-2H2
29	CH3N	Methanimine	NMOC_g				0.0104802	0.000489169	0.00556079			0.0437491				0.0142049		InChI=1S/CH3N/c1-2/h2H,1H2
30	C2H6	Ethane	NMOC_g	7.0735	8.90489	5.96598	7.67637	10.4616	6.65666	17.8571	4.55925	8.29518	43.741	2.48586	5.17447	8.50298	30.3158	InChI=1S/C2H6/c1-2/h1-2H3
30	CH2O	Formaldehyde	NMOC_g	19.573	15.598	14.5779	19.8078	5.60132	17.5083	25.2188	13.832	15.3619	8.19248	3.20345	13.0636	28.3549	26.2036	InChI=1S/CH2O/c1-2/h1H2
31	CH3O	Methanol	NMOC_g	13.4974	19.219	19.8431	17.1962	14.827	12.6706	23.6163	16.8453	19.0394	149.821	5.22599	43.9211	26.5451	9.74942	InChI=1S/CH4O/c1-2/h2H,1H3
40	C3H4	1,2-Propadiene, propyne, other (unknown)	NMOC_g						0.326306									40.03076_C3H4
40	C3H4	Propadiene	NMOC_g	0.324274	2.02663	0.102066	0.148664	0.0648694	0.0945946		0.235447	0.278333			0.0516758	0.163076	0.735922	InChI=1S/C3H4/c1-3-2/h1-2H2
40	C3H4	Propyne	NMOC_g	1.6084	0.20203		0.817809	0.201816	1.24118		0.638614	0.72914				1.21611	1.35108	InChI=1S/C3H4/c1-3-2/h1H,2H3
41	C2H3N	Acetonitrile	NMOC_g	1.98158	1.48447	2.52796	1.489	4.97417	1.01685	0.109375	0.164148	4.17993			1.39146	2.58846	1.09559	InChI=1S/C2H3N/c1-2-3/h1H3
42	C2H2O	Ketene fregments	NMOC_g	15.4392	10.261		9.37542	4.21779	5.70452	6.91874	9.59228					14.816	7.66269	42.010040999999994_C2H2O
42	C3H6	Propene	NMOC_g	5.90792	5.48326	3.82805	4.79392	5.50438	3.46858	4.41264	3.20657	8.00909	9.08284	3.1829	4.21281	4.2914	17.889	InChI=1S/C3H6/c1-3-2/h3H,1H2,2H3
42	CH2N2	Cyanamide	NMOC_g		0.424628													InChI=1S/CH2N2/c2-1-3/h2H2
43	C2H5N	Ethenamine	NMOC_g				0.0705868	0.0148457	0.0125305			0.208272				0.152083		InChI=1S/C2H5N/c1-2-3/h2H,1,3H2
44	C2H4O	Acetaldehyde	NMOC_g	19.2351	10.1041	8.9053	10.3449	5.11947	8.73687	3.93772	4.71587	8.24432			5.64675	23.2532	21.684	InChI=1S/C2H4O/c1-2-3/h2H,1H3
44	C3H8	Propane	NMOC_g	0.759915	1.9612	0.723915	1.98686	11.5007	3.97807		1.73912	2.1682			0.516758	1.89263	11.0566	InChI=1S/C3H8/c1-3-2/h3H2,1-2H3
45	CH3NO	Formamide	NMOC_g				0.178633	0.120422	0.0300443			0.389738				0.212837		InChI=1S/CH3NO/c2-1-3/h1H,(H2,2,3)
45	C2H7N	Ethylamine + dimethylamine	NMOC_g	0.116066	0.100275		0.205609	0.00315242	0.0543438	0.24279	0.113057	0.0392503				0.413516	0.163175	45.05726_C2H7N
46	C2H6O	Ethanol	NMOC_g	2.3235	0.163563		1.15646	0.910981	0.298598		1.39144	1.24013				2.61513	1.13694	InChI=1S/C2H6O/c1-2-3/h3H,2H2,1H3
46	CH2O2	Formic acid	NMOC_g	2.87649	2.74449	4.3283	3.15009	1.12047	3.67225	2.01848	1.56891	1.66019	1.55175	0.375392	0.833328	5.24674	3.00014	InChI=1S/CH2O2/c2-1-3/h1H,(H,2,3)
48	CH4O2	Methane diol	NMOC_g				0.00454359	0.00206878	0.00182789			0.00362788				0.0118004		InChI=1S/CH4O2/c2-1-3/h2-3H,1H2
48	CH4S	Methane thiol	NMOC_g	0.198528	0.121485		0.112655	0.127431	0.0449595	0.0441643	0.0302807	0.878985				0.373463	0.0373114	InChI=1S/CH4S/c1-2/h2H,1H3
50	C4H2	1,3-Butadiyne	NMOC_g	0.0231748	0.0421153		0.0188688	0.00369359	0.0446461	0.0717499	0.0330527	0.0224266				0.0129661	0.0376099	InChI=1S/C4H2/c1-3-4-2/h1-2H
50	CH6O2	Methanol hydrate	NMOC_g		0.156051													InChI=1S/CH4O.H2O/c1-2;/h2H,1H3;1H2
51	C3HN	Propiolonitrile (=propyne nitrile)	NMOC_g				0.00971722	0.00417232	0.00656674			0.0151213				0.00302899		InChI=1S/C3HN/c1-2-3-4/h1H
52	C4H4	1-Buten-3-yne	NMOC_g	0.37516	0.287153		0.148186	0.0743009	0.178459	0.335544	0.228322	0.241152				0.267496	0.342691	InChI=1S/C4H4/c1-3-4-2/h1,4H,2H2
53	C3H3N	Acrylonitrile	NMOC_g	0.849148	0.157705	0.190789	0.25949	0.0980283	0.226994			0.422908				0.347972	0.119454	InChI=1S/C3H3N/c1-2-3-4/h2H,1H2
54	C3H2O	2-Propynal	NMOC_g	0.440693	0.217426		0.2674	0.149072	0.139682			0.212375				0.261576		InChI=1S/C3H2O/c1-2-3-4/h1,3H
54	C4H6	2-Butyne	NMOC_g	0.0320271			0.0127561	0.00253618			0.0486746	0.0409777				0.0216266	0.0727501	InChI=1S/C4H6/c1-3-4-2/h1-2H3
54	C4H6	1-Butyne	NMOC_g	0.102487			0.0286649	0.00461123	0.0498276		0.075151	0.0591833				0.0619511	0.10464	InChI=1S/C4H6/c1-3-4-2/h1H,4H2,2H3
54	C4H6	1,3-Butadiene	NMOC_g	1.1013	0.817904	0.182575	1.14717	0.708865	0.883059	0.920751	1.44995	2.2255		0.717659		1.11093	2.95604	InChI=1S/C4H6/c1-3-4-2/h3-4H,1-2H2
54	C4H6	1,2-Butadiene	NMOC_g	0.076865			0.0161116	0.00214756	0.0210152		0.0292214	0.0275041				0.0569609	0.0631301	InChI=1S/C4H6/c1-3-4-2/h4H,1H2,2H3
55	C3H5N	Propane nitrile	NMOC_g	0.404976	0.0897645	0.413666	0.100242	0.0893401	0.0872642			0.368631				0.382572		InChI=1S/C3H5N/c1-2-3-4/h2H2,1H3
56	C4H8	Trans-2-butene	NMOC_g	0.0844142	0.137435	0.131025	0.219106	0.32592	0.0878055		0.403701	0.441267			0.0922782	0.301422	1.05951	InChI=1S/C4H8/c1-3-4-2/h3-4H,1-2H3/b4-3+
56	C4H8	Cis-2-butene	NMOC_g	0.0714433	0.101603	0.109921	0.178067	0.259065	0.0794841		0.261299	0.302569			0.0738225	0.262535	0.934541	InChI=1S/C4H8/c1-3-4-2/h3-4H,1-2H3/b4-3-
56	C4H8	1-Butene	NMOC_g	0.492434	0.908108	0.354365	0.850453	1.04728	0.636266	0.959481	2.2831	1.15247			0.313746	0.803341	6.18567	InChI=1S/C4H8/c1-3-4-2/h3H,1,4H2,2H3
56	C4H8	I-butene	NMOC_g	0.444719	0.421396	0.496563	0.636248	1.29837	0.310476		3.57871	0.905507			0.203012	1.362	3.46573	InChI=1S/C4H8/c1-4(2)3/h1H2,2-3H3
56	C3H4O	Acrolein	NMOC_g	6.96479	2.4008	2.93423	3.08321	0.549698	3.51856	1.33949	1.57889	2.57292				5.45832	4.04985	InChI=1S/C3H4O/c1-2-3-4/h2-3H,1H2
57	C2H3NO	Methyl isocyanate + hydroxyacetonitrile	NMOC_g				0.138799	0.0652053	0.0341803			0.345658				0.215005		57.02086_C2H3NO
57	C2H3NO	Methyl isocyanate	NMOC_g		0.0254218													InChI=1S/C2H3NO/c1-3-2-4/h1H3
57	C2H3NO	Hydroxy acetonitrile	NMOC_g		0.0171109													InChI=1S/C2H3NO/c3-1-2-4/h4H,2H2
57	C3H7N	Propeneamines	NMOC_g				0.0590106	0.00846176	0.0061034			0.140096				0.0587198		57.05726_C3H7N
58	C4H10	Butane	NMOC_g	0.186663	0.457314	0.164172	0.526377	2.25501	0.549929		5.17381	0.654381			0.0712769	0.451187	3.24646	InChI=1S/C4H10/c1-3-4-2/h3-4H2,1-2H3
58	C4H10	I-butane	NMOC_g	0.0407517	0.193365	0.0493968	0.238853	0.992913	0.131925		1.4784	0.383434			0.0249469	0.15724	0.669265	InChI=1S/C4H10/c1-4(2)3/h4H,1-3H3
58	C3H6O	2-Propen-1-ol	NMOC_g		0.106036		0.075322									0.0556371		InChI=1S/C3H6O/c1-2-3-4/h2,4H,1,3H2
58	C3H6O	Propanal	NMOC_g	2.49878	0.0625676	0.435854	0.897885	0.0830737	1.14855						0.292235	1.73516	1.44422	InChI=1S/C3H6O/c1-2-3-4/h3H,2H2,1H3
58	C3H6O	Acetone	NMOC_g	3.06753	3.50736	2.74588	3.19833	1.98852	2.34714		2.84735	7.69139			1.87102	4.20416	8.54307	InChI=1S/C3H6O/c1-3(2)4/h1-2H3
58	C3H6O	Methyl vinyl ether	NMOC_g	1.51985				1.82462								1.1539		InChI=1S/C3H6O/c1-3-4-2/h3H,1H2,2H3
58	C2H2O2	Glyoxal	NMOC_g	4.27595			1.18403		1.14847			0.145401				2.88444		InChI=1S/C2H2O2/c3-1-2-4/h1-2H
59	C2H5NO	Acetamide	NMOC_g				0.349894	3.45595	0.0721933	0.150631	0.154642	3.79099				0.788054		InChI=1S/C2H5NO/c1-2(3)4/h1H3,(H2,3,4)
59	C3H9N	Trimethylamine	NMOC_g	0.25854	0.0489476		0.0326977	0.0144263	0.0103765			0.180885				0.330473	0.0136598	InChI=1S/C3H9N/c1-4(2)3/h1-3H3
60	CH4N2O	Ureae	NMOC_g		0.362261													InChI=1S/CH4N2O/c2-1(3)4/h(H4,2,3,4)
60	COS	unknown	NMOC_g				0.00659615		0.00192594									59.96646_COS
60	COS	Carbonyl sulfide	NMOC_g	0.328598	0.958092	0.104068	0.0980217	1.49224	0.217217		0.258787	0.629318				0.264736	0.66641	InChI=1S/COS/c2-1-3
60	C3H8O	Isopropyl alcohol	NMOC_g	0.0749434	0.016553		0.0279507		0.00700701							0.064174		InChI=1S/C3H8O/c1-3(2)4/h3-4H,1-2H3
60	C2H4O2	Acetic acid	NMOC_g	19.609	15.7185	12.8645	12.2272	11.4083	10.805	26.6874	18.8872	25.8501	172.759	8.04069	41.1201	21.5296	12.8005	InChI=1S/C2H4O2/c1-2(3)4/h1H3,(H,3,4)
60	C2H4O2	Methyl formate	NMOC_g	0.2133			0.151207		0.508709							0.305475		InChI=1S/C2H4O2/c1-4-2-3/h2H,1H3
60	C2H4O2	Glycolaldehyde	NMOC_g	3.52489	3.43883	11.9572	2.78812	3.14837	1.29008	3.3934	2.28344	2.33718				13.0607	15.7188	InChI=1S/C2H4O2/c3-1-2-4/h1,4H,2H2
60	C2H8N2	1,1-Dimethylhydrazine	NMOC_g				0.133258		0.322322									InChI=1S/C2H8N2/c1-4(2)3/h3H2,1-2H3
61	CH3NO2	Nitromethane	NMOC_g	0.822204	0.0502506		0.369052	0.0835422	0.244785			0.276093				0.464238		InChI=1S/CH3NO2/c1-2(3)4/h1H3
62	C2H6S	Ethylene glycol	NMOC_g		0.0161804													InChI=1S/C2H6O2/c3-1-2-4/h3-4H,1-2H2
62	C2H6S	Dimethyl sulfide	NMOC_g	0.0587645	0.0161535	0.00550442	0.07431	0.059384	0.0475792		0.896637	0.0739481				0.110552	0.0642309	InChI=1S/C2H6S/c1-3-2/h1-2H3
62	CH3Cl	Chloromethane	NMOC_g	0.505821	0.245693	0.216099	0.205135	0.542794	4.0279		2.8751	7.36621			0.483419	1.27505	6.09326	InChI=1S/CH3Cl/c1-2/h1H3
63	HNOS	unknown	NMOC_g				0.000523781	0.000225173				0.00157949				0.000817346		62.97736_HNOS
64	C5H4	1,3-Pentadiyne	NMOC_g	0.0713403	0.0705055		0.0441623	0.256723	0.0373412							0.0543085	0.0293827	InChI=1S/C5H4/c1-3-5-4-2/h1H,2H3
64	CH4O3	Hydroxymethylhydrogenperoxide	NMOC_g				0.866299											InChI=1S/CH4O3/c2-1-4-3/h2-3H,1H2
65	C4H3N	Cyanoallene isomers	NMOC_g				0.00490285	0.000436489	0.0011123			0.0034445				0.000792197		65.02596_C4H3N
66	C5H6	Pentenyne isomers	NMOC_g				0.0365494		0.0522341									66.046951_C5H6
66	C5H6	1,3-Cyclopentadiene	NMOC_g	0.27357	0.637737		0.338611	0.0758341	0.264939	0.416318	0.196985	0.155292				0.278604	0.759156	InChI=1S/C5H6/c1-2-4-5-3-1/h1-4H,5H2
66	C5H6	3-Penten-1-yne, (e)-	NMOC_g		0.00810286		0.0173786									0.000752203		InChI=1S/C5H6/c1-3-5-4-2/h1,4-5H,2H3/b5-4+
66	C5H6	3-Penten-1-yne, (z)-	NMOC_g		0.0428294		0.0332238									0.0218139		InChI=1S/C5H6/c1-3-5-4-2/h1,4-5H,2H3/b5-4-
66	C5H6	4-Penten-1-yne	NMOC_g		0.00520898		0.018912									0.00300881		InChI=1S/C5H6/c1-3-5-4-2/h1,4H,2,5H2
66	C5H6	1-Penten-3-yne	NMOC_g		0.0190996		0.0173786									0.00676983		InChI=1S/C5H6/c1-3-5-4-2/h3H,1H2,2H3
66	C5H6	1-Buten-3-yne, 2-methyl-	NMOC_g		0.0127331		0.0122673									0.00150441		InChI=1S/C5H6/c1-4-5(2)3/h1H,2H2,3H3
67	C4H5N	Pyrrole + butene nitrile isomers	NMOC_g									1.36452						67.0416599999999_C4H5N
67	C4H5N	2-Butenenitrile	NMOC_g				0.0259721									0.0334477		InChI=1S/C4H5N/c1-2-3-4-5/h2-3H,1H3/b3-2+
67	C4H5N	3-Butenenitrile	NMOC_g		0.0239458		0.0371029									0.0463122		InChI=1S/C4H5N/c1-2-3-4-5/h2H,1,3H2
67	C4H5N	Pyrrole	NMOC_g		0.172942	0.452768	0.111402	0.118092	0.109643							0.284195		InChI=1S/C4H5N/c1-2-4-5-3-1/h1-5H
67	C4H5N	Methacrylonitrile	NMOC_g	0.513676	0.0427603		0.0486618	0.027862								0.172895		InChI=1S/C4H5N/c1-4(2)3-5/h1H2,2H3
68	C5H8	Pentadiene isomer	NMOC_g				0.0298958		0.0383325									68.062600255_C5H8
68	C5H8	Cyclopentene	NMOC_g	0.0864731	0.194928		0.123673	0.0931027	0.251016							0.0485306		InChI=1S/C5H8/c1-2-4-5-3-1/h1-2H,3-5H2
68	C5H8	1-Pentyne	NMOC_g													0.00146016		InChI=1S/C5H8/c1-3-5-4-2/h1H,4-5H2,2H3
68	C5H8	1,4-Pentadiene	NMOC_g		0.124709		0.152055	0.0227035								0.0262829		InChI=1S/C5H8/c1-3-5-4-2/h3-4H,1-2,5H2
68	C5H8	Trans-1,3-pentadiene	NMOC_g	0.218726	0.33986		0.139465	0.100793	0.140346		0.0731555	0.165335				0.188602		InChI=1S/C5H8/c1-3-5-4-2/h3-5H,1H2,2H3/b5-4+
68	C5H8	Cis-1,3-pentadiene	NMOC_g		0.197175		0.113933	0.0902648	0.136637							0.114622		InChI=1S/C5H8/c1-3-5-4-2/h3-5H,1H2,2H3/b5-4-
68	C5H8	2-Pentyne	NMOC_g		0.0101115		0.0104181									0.00584063		InChI=1S/C5H8/c1-3-5-4-2/h3H2,1-2H3
68	C5H8	1-Butyne, 3-methyl-	NMOC_g		0.00449402													InChI=1S/C5H8/c1-4-5(2)3/h1,5H,2-3H3
68	C5H8	Isoprene	NMOC_g	0.520495	1.74326	0.47678	1.10813	1.18337	1.25178	0.306381	0.352755	0.772414		0.610032	0.571473	2.08045	1.21472	InChI=1S/C5H8/c1-4-5(2)3/h4H,1-2H2,3H3
68	C4H4O	Furan	NMOC_g	1.70437	2.06299	1.52421	1.69978	1.77237	1.22713	1.29952	1.01583	1.62345	4.13631	1.10389	3.6477	1.80691	1.30557	InChI=1S/C4H4O/c1-2-4-5-3-1/h1-4H
69	C4H7N	Dihydropyrrole + butane nitrile	NMOC_g						0.0203915			0.33674						69.05726_C4H7N
69	C4H7N	Isobutyronitrile	NMOC_g		0.0247377		0.0671413	0.0532211								0.0673753		InChI=1S/C4H7N/c1-4(2)3-5/h4H,1-2H3
69	C4H5O	unknown	NMOC_g				0.0124892	0.00308389	0.00336721			0.0129793				0.0320897		69.03346_C4H6O
69	C3H3NO	unknown	NMOC_g				0.0147655	0.00781252	0.00420014			0.041101				0.0447763		69.02086_C3H3NO
70	C5H10	Pentene + methyl butene	NMOC_g							0.0710511								70.07766_C5H10
70	C5H10	Cyclopentane	NMOC_g	0.0247066	0.139331		0.0126939	0.111697	0.0048048		0.0181689	0.302215				0.0138735	0.0728187	InChI=1S/C5H10/c1-2-4-5-3-1/h1-5H2
70	C5H10	Trans-2-pentene	NMOC_g	0.0382952	0.0958553	0.0119175	0.0869107	0.208572	0.0576577		0.0608627	0.211558				0.189858	0.883321	InChI=1S/C5H10/c1-3-5-4-2/h3,5H,4H2,1-2H3/b5-3+
70	C5H10	Cis-2-pentene	NMOC_g	0.0284126	0.203869	0.00686159	0.109916	0.205845	0.112613		0.0402479	0.0964589				0.103968	0.714203	InChI=1S/C5H10/c1-3-5-4-2/h3,5H,4H2,1-2H3/b5-3-
70	C5H10	1-Pentene	NMOC_g	0.129373	0.233027		0.160125	0.314582	0.0903978		0.0888252	0.322388				0.184741	2.35172	InChI=1S/C5H10/c1-3-5-4-2/h3H,1,4-5H2,2H3
70	C5H10	2-Methyl-1-butene	NMOC_g	0.0639901	0.0557325	0.01589	0.116349	0.197486	0.0741742		0.0836738	0.219418				0.132837	0.0807035	InChI=1S/C5H10/c1-4-5(2)3/h2,4H2,1,3H3
70	C5H10	3-Methyl-1-butene	NMOC_g	0.0694256	0.118341	0.0137232	0.060817	0.161202	0.0459459		0.0441977	0.115459				0.104372	0.31674	InChI=1S/C5H10/c1-4-5(2)3/h4-5H,1H2,2-3H3
70	C5H10	2-Methyl-2-butene	NMOC_g	0.027896	0.0105235	0.0144455	0.125853	0.283481	0.0588673		0.057026	0.207072				0.0908312		InChI=1S/C5H10/c1-4-5(2)3/h4H,1-3H3
70	C3H2O2	Propiolic acid	NMOC_g				0.0502887	0.00952481	0.0171523			0.0398031				0.0698831		InChI=1S/C3H2O2/c1-2-3(4)5/h1H,(H,4,5)
70	C4H6O	Mvk + methacrolein + crotonaldehyde	NMOC_g							0.66392								70.04126_C4H6O
70	C4H6O	Crotonaldehyde	NMOC_g	2.24828	0.424346	0.866728	0.824361	0.0450663	0.844675						0.891776	1.67714	1.24329	InChI=1S/C4H6O/c1-2-3-4-5/h2-4H,1H3/b3-2+
70	C4H6O	2,3-Dihydrofuran	NMOC_g		0.0540246		0.0763855	0.0108496								0.041844		InChI=1S/C4H6O/c1-2-4-5-3-1/h1,3H,2,4H2
70	C4H6O	2,5-Dihydrofuran	NMOC_g		0.0130969		0.0120666		0.0918919							0.0035461		InChI=1S/C4H6O/c1-2-4-5-3-1/h1-2H,3-4H2
70	C4H6O	Methyl vinyl ketone	NMOC_g	2.09287	0.697397	1.40843	1.2841	0.178948	1.28658		0.665904	1.35585			1.4735	2.96316	1.16961	InChI=1S/C4H6O/c1-3-4(2)5/h3H,1H2,2H3
70	C4H6O	Methacrolein	NMOC_g	0.611284	0.279776	0.541705	0.390837	0.163902	0.339711						0.584674	0.918143	0.374521	InChI=1S/C4H6O/c1-4(2)3-5/h3H,1H2,2H3
70	C4H6O	Butane nitrile	NMOC_g		0.0254219		0.0250602	0.023122								0.0191489		InChI=1S/C4H7N/c1-2-3-4-5/h2-3H2,1H3
71	C4H9N	Butene amine	NMOC_g				0.0119646	0.00319682	0.00163618			0.0630683				0.014505		InChI=1S/C4H9N/c1-2-3-4-5/h2H,1,3-5H2
72	C3H4O2	Pyruvaldehyde (=methyl glyoxal) + acrylic acid	NMOC_g						0.490392			2.09001						72.02056_C3H4O2
72	C3H4O2	Acrylic acid	NMOC_g		0.37155		0.277419		0.05664									InChI=1S/C3H4O2/c1-2-3(4)5/h2H,1H2,(H,4,5)
72	C3H4O2	Methylglyoxal	NMOC_g	6.61063	1.86511		2.13386	0.336151	2.11771	0.537898	0.769632					7.55902	1.53847	InChI=1S/C3H4O2/c1-3(5)2-4/h2H,1H3
72	C5H12	N-pentane	NMOC_g	0.0775055	0.222307	0.0282054	0.214406	0.854288	0.0881715		0.0804399	0.337665			0.00803845	0.184473	4.62595	InChI=1S/C5H12/c1-3-5-4-2/h3-5H2,1-2H3
72	C5H12	Isopentane	NMOC_g	0.0629332	0.0615598	0.0363979	0.116585	0.137991	0.0455455		0.491286	1.52385			0.0106222	0.150625	1.51264	InChI=1S/C5H12/c1-4-5(2)3/h5H,4H2,1-3H3
72	C5H12	2,2-Dimethylpropane	NMOC_g				0.00756534		0.000583917								0.0121751	InChI=1S/C5H12/c1-5(2,3)4/h1-4H3
72	C4H8O	Mek + butanal + 2-methylpropanal	NMOC_g						0.193882									72.05696_C4H8O
72	C4H8O	N-butanal	NMOC_g	0.144122	0.0876817		0.168001	0.0261112	0.168168		0.108509	0.183281				0.36179	1.2811	InChI=1S/C4H8O/c1-2-3-4-5/h4H,2-3H2,1H3
72	C4H8O	Tetrahydrofuran	NMOC_g		0.0105218		0.0102954		0.00934268							0.0107477		InChI=1S/C4H8O/c1-2-4-5-3-1/h1-4H2
72	C4H8O	Methyl ethyl ketone	NMOC_g	0.693707	0.40478	1.75552	0.68409	0.444296	0.647898	0.244602	0.907273	0.873456			1.34644	1.69472	0.834711	InChI=1S/C4H8O/c1-3-4(2)5/h3H2,1-2H3
72	C4H8O	2-Methylpropanal	NMOC_g	0.240203	0.115155	0.631989	0.169859	0.251297	0.26539						0.473695	0.276148		InChI=1S/C4H8O/c1-4(2)3-5/h3-4H,1-2H3
73	C2H3NO2	Nitroethene	NMOC_g				0.0233011	0.000194327	0.00516351							0.0119915		InChI=1S/C2H3NO2/c1-2-3(4)5/h2H,1H2
73	C3H7NO	unknown	NMOC_g				0.0450138	0.0275945	0.00792321			0.279439				0.0895833		73.05216_C3H7NO
73	CH3N3O	unknown	NMOC_g				0.00952017	0.00524684	0.0029712			0.0207876				0.0211614		73.02705999999989_CH3N3O
73	CHN2O2	unknown	NMOC_g				0.00337906	0.00621847	0.000790084			0.0470276				0.00141076		73.00326_CH2N2O2
74	C4H10O	1-Butanol	NMOC_g		0.0361344		1.31592		1.18172							0.0389113		InChI=1S/C4H10O/c1-2-3-4-5/h5H,2-4H2,1H3
74	C3H6O2	Methyl acetate + ethyl formate + hydroxyacetone	NMOC_g					0.54654										74.03626_C3H6O2
74	C3H6O2	Propanoic acid	NMOC_g		0.489542													InChI=1S/C3H6O2/c1-2-3(4)5/h2H2,1H3,(H,4,5)
74	C3H6O2	Ethyl formate	NMOC_g				0.0563443		0.102399									InChI=1S/C3H6O2/c1-2-5-3-4/h3H,2H2,1H3
74	C3H6O2	Methyl acetate	NMOC_g	1.0064	0.116836		1.00228	0.134935	2.10486							1.84752		InChI=1S/C3H6O2/c1-3(4)5-2/h1-2H3
74	C3H6O2	Acetol	NMOC_g	5.4227	1.17348	3.86026	2.44862	1.9556	2.2225	5.52087	3.91145	8.33327	31.3377		24.8323	14.2275	7.38721	InChI=1S/C3H6O2/c1-3(5)2-4/h4H,2H2,1H3
74	C3H6O2	Acetaldehyde, methoxy-	NMOC_g				0.0113969											InChI=1S/C3H6O2/c1-5-3-2-4/h2H,3H2,1H3
75	C2H5NO2	Nitroethane or ethane nitrite	NMOC_g				0.0254745	0.0020806	0.00154892			0.00928738				0.00549256		75.03146_C2H5NO2
76	C2H4O3	Peroxyacetic acid/hydroperoxy glycolaldehyde	NMOC_g						0.000780383			0.000654656				0.00677537		76.03801999999999_C2H4O3
76	C2H4O3	Glycolic acid	NMOC_g				0.25664		0.0254465									InChI=1S/C2H4O3/c3-1-2(4)5/h3H,1H2,(H,4,5)
76	C3H8O2	unknown	NMOC_g				0.030824	0.0251986	0.0114157			0.0477899				0.0589457		76.05186_C3H8O2
76	CS2	Carbon disulfide	NMOC_g	0.00910243	0.0965032		0.00200137									0.0229259		InChI=1S/CS2/c2-1-3
76	C5O	unknown	NMOC_g				0.000943306	0.000559969				0.00327328				0.00135507		75.99436_C5HO
76	C2H5Cl	Ethylchloride	NMOC_g	0.00455122	0.00198987		0.00216976	0.00229348	0.00553185		0.00703817	0.0225198				0.0064026		InChI=1S/C2H5Cl/c1-2-3/h2H2,1H3
77	C5H3N	unknown	NMOC_g				0.00424503	0.00202656	0.00245559			0.00678462				0.00267495		77.02596_C5H3N
77	CH3NOS	N-sulfinyl methanamine	NMOC_g				0.000478072	0.000368465				0.000969231				0.000668737		InChI=1S/CH3NOS/c2-1-4-3/h1H,2H2
77	C3H11NO	unknown	NMOC_g				0.000970591	0.000736929				0.00129231				0.000668737		77.08346_C3H11NO
77	CH3NO3	Methyl nitrate	NMOC_g	0.0101072	0.00650204	0.0272494	0.00671168		0.01092		0.040268	0.150253				0.14144	0.417941	InChI=1S/CH3NO3/c1-5-2(3)4/h1H3
78	C2H6O3	Ethene hydroxyperoxide	NMOC_g	0.155208			0.0511284		0.20482							0.121649		InChI=1S/C2H6O3/c1-2(3)7-4-5-6/h2-3H,1H3
78	C6H6	Benzene	NMOC_g	1.92607	2.68402	1.24777	1.90369	2.11304	2.35993	7.22935	3.15857	3.6597			0.961964	1.50926	10.9095	InChI=1S/C6H6/c1-2-4-6-5-3-1/h1-6H
78	C6H6	1,5-Hexadiyne	NMOC_g		0.00244867		0.00389249											InChI=1S/C6H6/c1-3-5-6-4-2/h1-2H,5-6H2
78	C6H6	Divinylacetylene	NMOC_g		0.0381992		0.0308955	0.00510782	0.036652							0.014639		InChI=1S/C6H6/c1-3-5-6-4-2/h3-4H,1-2H2
79	C5H5N	Pyridine + pentadienenitriles	NMOC_g						0.0412839			0.700018						79.0416599999999_C5H5N
79	C5H5N	Pyridine	NMOC_g		0.0691454		0.110494	0.189849								0.119655		InChI=1S/C5H5N/c1-2-4-6-5-3-1/h1-5H
79	C4HNO	unknown	NMOC_g				0.00170825	0.000718273	0.000915181			0.00125959				0.00130361		79.0052599999999_C4HON
79	CH7N2S	unknown	NMOC_g				0.0223448	0.0235234	0.00955043			0.115253				0.0215096		79.03246_CH8N2S
80	C5H4O	2,4-Cyclopentadiene-1-one + 2 other HCO isomers	NMOC_g									0.573413						80.02566_C5H4O
80	C5H4O	2,4-Cyclopentadiene-1-one	NMOC_g	0.883755	0.338407		0.533864	0.0963189	0.384017	0.435188	0.740456					1.32626	0.578699	InChI=1S/C5H4O/c6-5-3-1-2-4-5/h1-4H
80	C6H8	Methyl Cyclopentadiene isomers	NMOC_g				0.113318	0.0393658	0.0405066			0.213942						80.062600255_C6H8
80	C6H8	1,4-Cyclohexadiene	NMOC_g				0.00674699											InChI=1S/C6H8/c1-2-4-6-5-3-1/h1-2,5-6H,3-4H2
80	C6H8	1,3-Cyclohexadiene	NMOC_g		0.347922		0.14991	0.0348609								0.106477		InChI=1S/C6H8/c1-2-4-6-5-3-1/h1-4H,5-6H2
80	C6H8	2-Hexene-4-yne	NMOC_g													0.00476764		InChI=1S/C6H8/c1-3-5-6-4-2/h3,5H,1-2H3/b5-3+
80	C6H8	1-Hexen-3-yne	NMOC_g		0.0128922		0.0265663									0.0127137		InChI=1S/C6H8/c1-3-5-6-4-2/h3H,1,4H2,2H3
80	C6H8	1,3-Cyclopentadiene, 1-methyl-	NMOC_g		0.291746		0.198614	0.0726787								0.212955		InChI=1S/C6H8/c1-6-4-2-3-5-6/h2-4H,5H2,1H3
80	C6H8	1,3-Cyclopentadiene, 5-methyl-	NMOC_g		0.258322		0.170783	0.0613178								0.179581		InChI=1S/C6H8/c1-6-4-2-3-5-6/h2-6H,1H3
80	C4H4N2	Pyrazine	NMOC_g													0.0179965		InChI=1S/C4H4N2/c1-2-6-4-3-5-1/h1-4H
81	C5H7N	Methyl pyrrole isomers + Pentene nitrile isomers	NMOC_g		0.0161693							0.462526						81.05726_C5H7N
81	C5H7N	Butanenitrile, 2-methylene-	NMOC_g													0.0084205		InChI=1S/C5H7N/c1-3-5(2)4-6/h2-3H2,1H3
81	C5H7N	3-Butenenitrile, 3-methyl-	NMOC_g													0.00906823		InChI=1S/C5H7N/c1-5(2)3-4-6/h1,3H2,2H3
81	C5H7N	1H-pyrrole, 3-methyl-	NMOC_g				0.0198295									0.0246138		InChI=1S/C5H7N/c1-5-2-3-6-4-5/h2-4,6H,1H3
81	C5H7N	1H-pyrrole, 2-methyl-	NMOC_g		0.0231081		0.0569181	0.0245762								0.0440457		InChI=1S/C5H7N/c1-5-3-2-4-6-5/h2-4,6H,1H3
81	C5H7N	1-Methylpyrrole	NMOC_g		0.0504606		0.0312032	0.0427353	0.0436573							0.0369207		InChI=1S/C5H7N/c1-6-4-2-3-5-6/h2-5H,1H3
81	C4H3NO	unknown	NMOC_g				0.00645654	0.00175134	0.00304386			0.00522108				0.0165285		81.02086_C4H3NO
81	C5H5O	unknown	NMOC_g				0.0316767	0.0133102	0.00820874			0.0660313				0.0661142		81.03346_C5H5O
82	C6H10	C6H10 isomers	NMOC_g	0.118953			0.194422			0.059659	0.0838742	0.755409					0.447736	82.078250319_C6H10
82	C6H10	Cyclohexene	NMOC_g		0.0824056		0.0591599	0.0705842	0.0593968							0.0214701		InChI=1S/C6H10/c1-2-4-6-5-3-1/h1-2H,3-6H2
82	C6H10	Trans-1,3-hexadiene	NMOC_g		0.0416838		0.0264155	0.0338983	0.0189455							0.0192101		InChI=1S/C6H10/c1-3-5-6-4-2/h3,5-6H,1,4H2,2H3/b6-5+
82	C6H10	Cis-1,3-hexadiene	NMOC_g				0.00972687		0.00972879									InChI=1S/C6H10/c1-3-5-6-4-2/h3,5-6H,1,4H2,2H3/b6-5-
82	C6H10	1,4-Hexadiene, (e)-	NMOC_g		0.0169941		0.0325007	0.00802854								0.00565002		InChI=1S/C6H10/c1-3-5-6-4-2/h3-4,6H,1,5H2,2H3/b6-4+
82	C6H10	1,4-Hexadiene, (z)-	NMOC_g		0.0134671		0.0160447											InChI=1S/C6H10/c1-3-5-6-4-2/h3-4,6H,1,5H2,2H3/b6-4-
82	C6H10	1,5-Hexadiene	NMOC_g		0.0323851		0.0571848	0.0161686								0.01017		InChI=1S/C6H10/c1-3-5-6-4-2/h3-4H,1-2,5-6H2
82	C6H10	3-Hexyne	NMOC_g					0.00925512										InChI=1S/C6H10/c1-3-5-6-4-2/h3-4H2,1-2H3
82	C6H10	2,4-Hexadiene, (e,e)-	NMOC_g		0.0128258		0.0287981	0.0163916								0.010735		InChI=1S/C6H10/c1-3-5-6-4-2/h3-6H,1-2H3/b5-3+,6-4+
82	C6H10	2,4-Hexadiene, (e,z)-	NMOC_g		0.0208419		0.0444314	0.023082								0.014125		InChI=1S/C6H10/c1-3-5-6-4-2/h3-6H,1-2H3/b5-3-,6-4+
82	C6H10	4-Methyl-1,3-pentadiene	NMOC_g		0.0391186		0.0818689	0.0432649								0.0220351		InChI=1S/C6H10/c1-4-5-6(2)3/h4-5H,1H2,2-3H3
82	C6H10	1,3-Pentadiene, 2-methyl-, (e)-	NMOC_g		0.0371947		0.0417573	0.0385816								0.0276851		InChI=1S/C6H10/c1-4-5-6(2)3/h4-5H,2H2,1,3H3/b5-4+
82	C6H10	1,3-Pentadiene, 2-methyl-, (z)-	NMOC_g		0.0987584		0.224625									0.0542402		InChI=1S/C6H10/c1-4-5-6(2)3/h4-5H,2H2,1,3H3/b5-4-
82	C6H10	1,4-Pentadiene, 2-methyl-	NMOC_g		0.0169941		0.0325007	0.00735949								0.00904003		InChI=1S/C6H10/c1-4-5-6(2)3/h4H,1-2,5H2,3H3
82	C6H10	1,3-Pentadiene, 3-methyl-, (z)-	NMOC_g		0.0275754		0.0789891	0.0159456								0.0214701		InChI=1S/C6H10/c1-4-6(3)5-2/h4-5H,1H2,2-3H3/b6-5-
82	C6H10	1,4-Pentadiene, 3-methyl-	NMOC_g		0.00641289		0.0106964									0.00282501		InChI=1S/C6H10/c1-4-6(3)5-2/h4-6H,1-2H2,3H3
82	C6H10	1,3-Butadiene, 2,3-dimethyl-	NMOC_g		0.0218038		0.0205701	0.00579839								0.014125		InChI=1S/C6H10/c1-5(2)6(3)4/h1,3H2,2,4H3
82	C6H10	Cyclopentene, 3-methyl-	NMOC_g		0.0246896		0.0162504	0.0346788								0.017515		InChI=1S/C6H10/c1-6-4-2-3-5-6/h2,4,6H,3,5H2,1H3
82	C6H10	1-Methylcyclopentene	NMOC_g		0.0740688		0.0707336	0.0844112	0.0599089							0.0497201		InChI=1S/C6H10/c1-6-4-2-3-5-6/h4H,2-3,5H2,1H3
82	C5H6O	Pent-2-ynal	NMOC_g		0.00605597		0.00720912											InChI=1S/C5H6O/c1-2-3-4-5-6/h5H,2H2,1H3
82	C5H6O	1,4-Pentadien-3-one	NMOC_g				0.00320406									0.00611383		InChI=1S/C5H6O/c1-3-5(6)4-2/h3-4H,1-2H2
82	C5H6O	3-Methylfuran	NMOC_g	0.0506184	0.0624231	1.8189	0.0984174	0.0532729	0.0501589						1.78218	0.160536	0.144913	InChI=1S/C5H6O/c1-5-2-3-6-4-5/h2-4H,1H3
82	C5H6O	2-Methylfuran	NMOC_g	0.96871	0.916009	0.24663	0.680697	0.521745	0.599556	0.58963	0.654764	1.64748			0.254598	1.07471	0.977376	InChI=1S/C5H6O/c1-5-3-2-4-6-5/h2-4H,1H3
82	C5H6O	Cyclopentenone	NMOC_g		0.0917712		0.636263	0.0622586	0.290844							0.758115		InChI=1S/C5H6O/c6-5-3-1-2-4-5/h1,3H,2,4H2
82	C5H6O	3-Cyclopenten-1-one	NMOC_g		0.0414601		0.0346438									0.0476878		InChI=1S/C5H6O/c6-5-3-1-2-4-5/h1-2H,3-4H2
82	C4H2O2	unknown	NMOC_g				0.0100371	0.000691995	0.00299927			0.000606754				0.00627961		82.00496_C4H2O2
82	C4H6N2	1-Methylpyrazole	NMOC_g				0.0480412		0.0261481									InChI=1S/C4H6N2/c1-6-4-2-3-5-6/h2-4H,1H3
83	C4H5NO	unknown	NMOC_g				0.0405522	0.0169205	0.00958921			0.203211				0.0775494		83.03656_C4H5NO
83	C4H5NO	Methyloxazole	NMOC_g		0.00671476													InChI=1S/C4H5NO/c1-4-5-2-3-6-4/h2-3H,1H3
83	C5H9N	Pentanenitriles	NMOC_g						0.00679734			0.168144						83.07296_C5H9N
83	C5H9N	Pentanenitrile	NMOC_g													0.00609266		InChI=1S/C5H9N/c1-2-3-4-5-6/h2-4H2,1H3
83	C5H9N	Butanenitrile, 2-methyl-	NMOC_g		0.0215988		0.0226681	0.0216453								0.0121853		InChI=1S/C5H9N/c1-3-5(2)4-6/h5H,3H2,1-2H3
83	C5H9N	Butanenitrile, 3-methyl-	NMOC_g		0.0289621		0.0411803	0.0257551								0.0292448		InChI=1S/C5H9N/c1-5(2)3-4-6/h5H,3H2,1-2H3
84	C4H4S	Thiophene	NMOC_g		0.0163711		0.0415114	0.0311282	0.0210391			0.113427				0.0784858		InChI=1S/C4H4S/c1-2-4-5-3-1/h1-4H
84	C6H12	Hexenes+C6H12 isomers	NMOC_g	0.0588841	0.126059		0.151269		0.109032	0.0106771	0.0284232							84.093900383_C6H12
84	C6H12	Cyclohexane	NMOC_g	0.0700021	0.17914		0.0149078	0.00658567	0.0117618		0.0243119	0.420968				0.0274197	0.292572	InChI=1S/C6H12/c1-2-4-6-5-3-1/h1-6H2
84	C6H12	2-Hexene, (e)-	NMOC_g		0.0295589		0.026506	0.0613617								0.0136497		InChI=1S/C6H12/c1-3-5-6-4-2/h3,5H,4,6H2,1-2H3/b5-3+
84	C6H12	Cis-2-hexene	NMOC_g		0.00663482		0.0466313	0.0275971	0.0735736									InChI=1S/C6H12/c1-3-5-6-4-2/h3,5H,4,6H2,1-2H3/b5-3-
84	C6H12	1-Hexene	NMOC_g	0.333539	0.301825		0.16457	0.379042	0.200951		0.138501	0.311003				0.20108		InChI=1S/C6H12/c1-3-5-6-4-2/h3H,1,4-6H2,2H3
84	C6H12	2-Methyl-1-pentene	NMOC_g	0.0144122		0.00842652	0.302575	0.114361	0.337337									InChI=1S/C6H12/c1-4-5-6(2)3/h2,4-5H2,1,3H3
84	C6H12	1-Pentene, 4-methyl-	NMOC_g		0.0213734		0.0123025	0.0330329								0.0205136		InChI=1S/C6H12/c1-4-5-6(2)3/h4,6H,1,5H2,2-3H3
84	C6H12	2-Pentene, 4-methyl-	NMOC_g		0.00363802		0.00481928	0.00742195								0.00120438		InChI=1S/C6H12/c1-4-5-6(2)3/h4-6H,1-3H3/b5-4+
84	C6H12	2-Pentene, 2-methyl-	NMOC_g		0.114598		0.0664659	0.051431								0.0297081		InChI=1S/C6H12/c1-4-5-6(2)3/h5H,4H2,1-3H3
84	C6H12	2-Pentene, 3-methyl-, (e)-	NMOC_g		0.0286494		0.0261044	0.0172482								0.0144526		InChI=1S/C6H12/c1-4-6(3)5-2/h4H,5H2,1-3H3/b6-4+
84	C6H12	2-Pentene, 3-methyl-, (z)-	NMOC_g				0.048996									0.0164599		InChI=1S/C6H12/c1-4-6(3)5-2/h4H,5H2,1-3H3/b6-4-
84	C6H12	1-Butene, 2,3-dimethyl-	NMOC_g		0.0659391		0.0459839	0.0550897								0.0244891		InChI=1S/C6H12/c1-5(2)6(3)4/h6H,1H2,2-4H3
84	C6H12	Methylcyclopentane	NMOC_g	0.0288244	0.0131878		0.0212158	0.0250883	0.0137638							0.017313		InChI=1S/C6H12/c1-6-4-2-3-5-6/h6H,2-5H2,1H3
84	C4H4O2	2-(3H)furanone	NMOC_g	3.86782	1.10758		1.67965	0.619877	1.61792	0.540648	0.978953	2.40477				4.19186	1.76643	InChI=1S/C4H4O2/c5-4-2-1-3-6-4/h1,3H,2H2
84	C5H8O	3-Methyl-3-butene-2-one + cyclopentanone + HCO1 isomers	NMOC_g				0.46725		0.18016			0.945915						84.05696_C5H8O
84	C5H8O	4-Pentenal	NMOC_g		0.00544358		0.0136546									0.00570768		InChI=1S/C5H8O/c1-2-3-4-5-6/h2,5H,1,3-4H2
84	C5H8O	2-Pentenal, (e)-	NMOC_g				0.0116466									0.00642114		InChI=1S/C5H8O/c1-2-3-4-5-6/h3-5H,2H2,1H3/b4-3+
84	C5H8O	2H-pyran, 3,4-dihydro-	NMOC_g		0.00512337		0.00742972											InChI=1S/C5H8O/c1-2-4-6-5-3-1/h2,4H,1,3,5H2
84	C5H8O	3-Penten-2-one, (e)-	NMOC_g		0.00256168		0.023494	0.00797871								0.0963171		InChI=1S/C5H8O/c1-3-4-5(2)6/h3-4H,1-2H3/b4-3+
84	C5H8O	3-Penten-2-one (z)	NMOC_g		0.00640421		0.00983936									0.0278249		InChI=1S/C5H8O/c1-3-4-5(2)6/h3-4H,1-2H3/b4-3-
84	C5H8O	4-Penten-2-one	NMOC_g		0.00704463		0.00923695	0.00335106								0.0178365		InChI=1S/C5H8O/c1-3-4-5(2)6/h3H,1,4H2,2H3
84	C5H8O	2-Methyl-2-butenal	NMOC_g		0.0124882		0.0416229	0.0100532	0.0295295							0.0178365		InChI=1S/C5H8O/c1-3-5(2)4-6/h3-4H,1-2H3/b5-3+
84	C5H8O	2-Ethylacrolein	NMOC_g		0.0118478		0.0176707									0.01855		InChI=1S/C5H8O/c1-3-5(2)4-6/h4H,2-3H2,1H3
84	C5H8O	Pentenone	NMOC_g		0.231391		3.30492	0.11814	0.723114	0.234896	0.356787					0.401589	3.90369	InChI=1S/C5H8O/c1-3-5(6)4-2/h3H,1,4H2,2H3
84	C5H8O	3-Methyl-3-buten-2-one	NMOC_g		0.0931812		0.14008	0.0556914								0.166236		InChI=1S/C5H8O/c1-4(2)5(3)6/h1H2,2-3H3
84	C5H8O	2-Butenal, 3-methyl-	NMOC_g		0.00576379		0.0144578									0.00285384		InChI=1S/C5H8O/c1-5(2)3-4-6/h3-4H,1-2H3
84	C5H8O	Furan, 2,3-dihydro-5-methyl-	NMOC_g		0.00704463		0.0180723									0.00856152		InChI=1S/C5H8O/c1-5-3-2-4-6-5/h3H,2,4H2,1H3
84	C5H8O	Cyclopentanone	NMOC_g		0.0349029		0.426309	0.0472339	0.417417							0.179079		InChI=1S/C5H8O/c6-5-3-1-2-4-5/h1-4H2
84	C5H8O	C5H8O isomers	NMOC_g													0.00784806		609.811_2.244
85	C3H3NO2	unknown	NMOC_g				0.00989138	0.00834464	0.00290062			0.0269256				0.0236261		85.01586_C3H3NO2
85	C5H11N	unknown	NMOC_g				0.00631048	0.00283718	0.00119946			0.0626313				0.0121159		85.08856_C5H11N
86	C6H14	2-Methylpentane+3-methylpentane	NMOC_g					0.0146807	0.00674687			0.0711596						86.10955_C6H14
86	C6H14	N-hexane	NMOC_g	0.0824511	0.111846	0.0296888	0.118087	0.314684	0.049375		0.0379339	0.354141				0.0441804	1.13715	InChI=1S/C6H14/c1-3-5-6-4-2/h3-6H2,1-2H3
86	C6H14	2-Methylpentane	NMOC_g	0.0643521	0.0286782		0.0249202	0.11157	0.0146658		0.0247142	0.268677				0.0375967	0.688333	InChI=1S/C6H14/c1-4-5-6(2)3/h6H,4-5H2,1-3H3
86	C6H14	3-Methylpentane	NMOC_g	0.032176			0.0207482	0.0125951	0.0156436		0.0182485	0.205758				0.038359	0.982439	InChI=1S/C6H14/c1-4-6(3)5-2/h6H,4-5H2,1-3H3
86	C6H14	2,3-Dimethylbutane	NMOC_g		0.0100448		0.00339309	0.102281			0.0881907	0.185596				0.00113162	0.0700848	InChI=1S/C6H14/c1-5(2)6(3)4/h5-6H,1-4H3
86	C6H14	2,2-Dimethylbutane	NMOC_g				0.0199061											InChI=1S/C6H14/c1-5-6(2,3)4/h5H2,1-4H3
86	C5H10O	3-Methyl-2-butanone + 2-methylbutanal+3-methylbutanal+2-pentanone +3-pentanone	NMOC_g						0.0302648			0.461091						86.07256_C5H10O
86	C5H10O	Pentanal	NMOC_g		0.0688474		0.041188	0.0198336										InChI=1S/C5H10O/c1-2-3-4-5-6/h5H,2-4H2,1H3
86	C5H10O	2-Pentanone	NMOC_g	0.616976	0.08452	0.235159	0.131751	0.0493701	0.256163						0.2043	0.145889		InChI=1S/C5H10O/c1-3-4-5(2)6/h3-4H2,1-2H3
86	C5H10O	2-Methylbutanal	NMOC_g		0.0239855		0.129259	0.0879485	0.206299							0.0431623		InChI=1S/C5H10O/c1-3-5(2)4-6/h4-5H,3H2,1-2H3
86	C5H10O	3-Pentanone	NMOC_g			0.0881845	0.111685		0.146658						0.0913339	0.0543845		InChI=1S/C5H10O/c1-3-5(6)4-2/h3-4H2,1-2H3
86	C5H10O	3-Methyl-2-butanone	NMOC_g		0.00266506		0.064268	0.0618621	0.11146							0.0612905		InChI=1S/C5H10O/c1-4(2)5(3)6/h4H,1-3H3
86	C5H10O	2-Methyl-3-buten-2-ol	NMOC_g				0.0206979											InChI=1S/C5H10O/c1-4-5(2,3)6/h4,6H,1H2,2-3H3
86	C5H10O	3-Methylbutanal	NMOC_g		0.0759542		0.0720563	0.139997								0.0699229		InChI=1S/C5H10O/c1-5(2)3-4-6/h4-5H,3H2,1-2H3
86	C3H2O3	unknown	NMOC_g				0.0280831	0.00478361	0.00673975			0.0384724				0.0311352		85.99986_C3H2O3
86	C4H6O2	2,3-Butanedione + methyl acrylate + other hco2	NMOC_g									3.31847						86.03626_C4H6O2
86	C4H6O2	2,3-Dihydro-1,4-dioxin	NMOC_g				0.024878		0.0240284									InChI=1S/C4H6O2/c1-2-6-4-3-5-1/h1-2H,3-4H2
86	C4H6O2	2,3-Butadione	NMOC_g	3.56129	0.737546	2.14582	2.05087	0.391325	1.29534	1.03719	1.6289				1.89878	2.16451	0.995272	InChI=1S/C4H6O2/c1-3(5)4(2)6/h1-2H3
86	C4H6O2	Methyl acrylate	NMOC_g		0.0194809		0.0572701	0.0197394	0.0807355							0.0195401		InChI=1S/C4H6O2/c1-3-4(5)6-2/h3H,1H2,2H3
86	C4H6O2	Vinyl acetate	NMOC_g		0.0194809		0.0129733		0.00288341							2.58223		InChI=1S/C4H6O2/c1-3-6-4(2)5/h3H,1H2,2H3
86	C4H6O2	Butyrolactone	NMOC_g				0.0278545									0.118804		InChI=1S/C4H6O2/c5-4-2-1-3-6-4/h1-3H2
87	C3H5NO2	unknown	NMOC_g				0.00493282	0.00228279	0.00266351			0.00829231				0.00355123		87.03146_C3H6NO2
87	C4H9NO	C4h9no amides	NMOC_g	0.263992			0.0783702	0.024189	0.0223462	0.208989	0.121826	0.0960764				0.198115	0.0689617	87.06788999999999_C4H9NO
88	C4H8O2	1-Hydroxy-2-butanone	NMOC_g													0.0366699		InChI=1S/C4H8O2/c1-2-4(6)3-5/h5H,2-3H2,1H3
88	C4H8O2	2-Butanone, 3-hydroxy-	NMOC_g													0.0282076		InChI=1S/C4H8O2/c1-3(5)4(2)6/h3,5H,1-2H3
88	C4H8O2	Methyl propanoate	NMOC_g		0.115824		0.122818	0.0845305	0.109581			0.648213				0.666322		InChI=1S/C4H8O2/c1-3-4(5)6-2/h3H2,1-2H3
88	C4H8O2	Ethyl acetate	NMOC_g	0.432366	0.20374		0.265886	0.155582	0.148971	0.216806	0.355754					0.294542	0.222851	InChI=1S/C4H8O2/c1-3-6-4(2)5/h3H2,1-2H3
88	C3H5Cl	3-Chloro-1-propene	NMOC_g													0.00276476		InChI=1S/C3H5Cl/c1-2-3-4/h2H,1,3H2
88	C3H4O3	unknown	NMOC_g	0.0298725	0.0458072		0.0423375		0.00629733	0.00370609	0.0135656						0.012211	88.01552_C3H4O3
88	C3H4O3	Pyruvic acid	NMOC_g		2.27997		0.221548	0.0763684	0.0268286			0.0282692				0.0510583		InChI=1S/C3H4O3/c1-2(4)3(5)6/h1H3,(H,5,6)
89	C2H3NO3	unknown	NMOC_g				0.01055	0.000318784	0.00407552			0.00335419				0.0162		89.01076_C2H3NO3
89	C3H7NO2	Nitropropanes	NMOC_g				0.00508999	0.00111574	0.000652633			0.0184481				0.00520714		89.04716_C3H7NO2
89	C4H11NO	C4h11no amines	NMOC_g	0.0139912			0.00127515	0.000159392	0.000652633			0.00838548				0.0756604		89.08354_C4H11NO
90	C7H6	unknown	NMOC_g	0.0760964	0.137468		0.13865	0.0808854	0.103811	0.0905933	0.0337206	0.267289				0.0928787	0.132331	90.0463599999999_C7H6
90	C2H2O4	unknown	NMOC_g				0.000992228	0.000315242	0.000631774			0.00138205				0.00114428		89.99476_C2H2O4
90	C3H6O3	unknown	NMOC_g				0.0700278	0.0124521	0.023276			0.0771185				0.169354		90.03116_C3H6O3
90	C3H6O3	Hydroperoxy acetone	NMOC_g				0.278837											InChI=1S/C3H6O3/c1-3(4)2-6-5/h5H,2H2,1H3
90	C4H10S	Diethyl sulfide + butanethiol	NMOC_g		0.238411													90.184_C4H10S
91	C6H5N	Ethylnylpyrrole	NMOC_g				0.0182493	0.00342956	0.00300832			0.0147621				0.00339513		91.0416599999999_C6H5N
91	C2H5NO3	Ethyl nitrate	NMOC_g	0.00333729	0.00389663	0.0158344	0.00276008		0.00456918		0.00852314	0.0737717				0.00481678		InChI=1S/C2H5NO3/c1-2-6-3(4)5/h2H2,1H3
91	C4H13NO	unknown	NMOC_g				0.000889789	0.000623556				0.00218698				0.00113171		91.09916_C4H13NO
92	C6H4O	unknown	NMOC_g	0.0552676	0.018311		0.0259367	0.216027	0.0176719	0.165727	0.0426348	0.0386674				0.0370065		92.02566_C6H4O
92	C7H8	Heptadiyne isomers	NMOC_g						0.0201071									92.062600255_C7H8
92	C7H8	1,3,5-Cycloheptatriene	NMOC_g		0.00456729											0.00431699		InChI=1S/C7H8/c1-2-4-6-7-5-3-1/h1-6H,7H2
92	C7H8	Toluene	NMOC_g	0.64949	4.64952	0.714422	1.36758	1.05922	0.873524	0.69038	0.989641	1.98647			0.324659	0.990457	2.6295	InChI=1S/C7H8/c1-7-5-3-2-4-6-7/h2-6H,1H3
92	C7H8	C7H8 isomers	NMOC_g		0.0328015		0.0198073	0.00284192								0.00755473		679.789_1.632
92	C3H8O3	unknown	NMOC_g					0.0494964	0.02277			0.163052						92.04675999999989_C3H8O3
92	C3H8O3	Propene hydroxyperoxide	NMOC_g	0.0451164			0.0402852		0.105105							0.120967		InChI=1S/C3H8O3/c1-3(2)7-5-4-6/h3,6H,1-2H3
93	C2H7NO3	unknown	NMOC_g		0.00749093		0.0132322	0.0131181	0.00403991			0.0607211				0.0171643		93.04205999999989_C2H7NO3
93	C6H7N	2-Methyl pyridine + 3-methylpyridine	NMOC_g						0.0216147			0.338647						93.05726_C6H7N
93	C6H7N	Pyridine, 3-methyl-	NMOC_g													0.0168803		InChI=1S/C6H7N/c1-6-3-2-4-7-5-6/h2-5H,1H3
93	C6H7N	Pyridine, 2-methyl-	NMOC_g				0.0597885	0.0585196								0.0429041		InChI=1S/C6H7N/c1-6-4-2-3-5-7-6/h2-5H,1H3
93	C5H3NO	2-Furancarbonitrile + 3-furancarbonitrile	NMOC_g		0.0599274		0.0211328	0.0260837	0.00249167			0.041194				0.0171643		93.02086_C5H3NO
94	CCl2	Dichloromethylene	NMOC_g				0.000647247											InChI=1S/CCl2/c2-1-3
94	C7H10	unknown	NMOC_g	0.233293					0.223241	0.111025	0.0484617	0.591224					0.498226	94.07766_C7H10
94	C7H10	Cycloheptadiene	NMOC_g		0.143842													InChI=1S/C7H10/c1-2-4-6-7-5-3-1/h1-4H,5-7H2
94	C7H10	C7H10 isomers	NMOC_g		1.01031		0.409615	1.17888								0.460657		554.829_1.21
94	C6H6O	Vinylfuran	NMOC_g		0.0280398		0.0190208									0.0269353		InChI=1S/C6H6O/c1-2-6-4-3-5-7-6/h2-5H,1H2
94	C6H6O	Phenol	NMOC_g	1.57251	3.63293	1.21019	1.09711	3.26147	1.37626	4.17745	1.33428	2.34995	14.3833	4.04985	5.3215	1.91861	1.46039	InChI=1S/C6H6O/c7-6-4-2-1-3-5-6/h1-5,7H
94	C5H6N2	Methyl Diazine isomers	NMOC_g						0.0983963									44.037448136_C5H6N2
94	C5H6N2	3-Methylpyridazine	NMOC_g		0.0288526		0.0749592									0.0311604		InChI=1S/C5H6N2/c1-5-3-2-4-6-7-5/h2-4H,1H3
94	C5H6N2	Pyrazine, methyl-	NMOC_g													0.0179568		InChI=1S/C5H6N2/c1-5-4-6-2-3-7-5/h2-4H,1H3
94	C5H2O2	unknown	NMOC_g				0.0195393	0.000905482	0.00369448			0.0182607				0.0356067		94.00496_C5H2O2
94	C2H6S2	Dimethyl disulfide	NMOC_g		0.0115615		0.0102831	0.00528198	0.00230742			0.0119092				0.0142427		InChI=1S/C2H6S2/c1-3-4-2/h1-2H3
94	CH3Br	Methyl bromide	NMOC_g	0.00821801	0.00533609	0.00770937	0.00548657	0.0212583	0.0023302		0.00874706	0.0165668			0.00637701	0.00861129	0.012595	InChI=1S/CH3Br/c1-2/h1H3
95	C5H3O2	unknown	NMOC_g		0.00879987		0.0510061	0.0249373	0.0120142			0.019116				0.108406		95.01276_C5H3O2
95	C6H9N	2,5-Dimethyl pyrrole + 1-ethylpyrrole + other c2 substituted pyrroles	NMOC_g						0.00852112			0.259244						95.07296_C6H9N
95	C6H9N	C2 pyrrole	NMOC_g		0.00615991											0.00900527		InChI=1S/C6H9N/c1-2-6-4-3-5-7-6/h3-5,7H,2H2,1H3
95	C6H9N	1H-pyrrole, 1-ethyl-	NMOC_g				0.0242477									0.0130986		InChI=1S/C6H9N/c1-2-7-5-3-4-6-7/h3-6H,2H2,1H3
95	C6H9N	1H-pyrrole, 2,5-dimethyl-	NMOC_g				0.0230744	0.0207649								0.00982394		InChI=1S/C6H9N/c1-5-3-4-6(2)7-5/h3-4,7H,1-2H3
95	C6H9N	1H-pyrrole, 2,4-dimethyl-	NMOC_g													0.0114613		InChI=1S/C6H9N/c1-5-3-6(2)7-4-5/h3-4,7H,1-2H3
95	C5H5NO	4-Pyridinol	NMOC_g				0.0496427	0.0444989	0.0213737			0.337017				0.0531189		InChI=1S/C5H5NO/c7-5-1-3-6-4-2-5/h1-4H,(H,6,7)
95	C5H5NO	Pyridinol	NMOC_g		0.00645323													InChI=1S/C5H5NO/c7-5-3-1-2-4-6-5/h1-4H,(H,6,7)
96	C6H8O	2,5-Dimethyl furan + 2-ethylfuran + other c2 substituted furans	NMOC_g			0.631989						1.76419			0.661019			96.05696_C6H8O
96	C6H8O	2,4-Hexadienal, (e,e)-	NMOC_g													0.047008		InChI=1S/C6H8O/c1-2-3-4-5-6-7/h2-6H,1H3/b3-2+,5-4+
96	C6H8O	Furan, 3-ethyl-	NMOC_g		0.00596862		0.0101838									0.00559619		InChI=1S/C6H8O/c1-2-6-3-4-7-5-6/h3-5H,2H2,1H3
96	C6H8O	2-Ethylfuran	NMOC_g		0.139997		0.0790131	0.0251106	0.0745877							0.0761082	0.0892841	InChI=1S/C6H8O/c1-2-6-4-3-5-7-6/h3-5H,2H2,1H3
96	C6H8O	2-Cyclopenten-1-one, 3-methyl-	NMOC_g													0.0537234		InChI=1S/C6H8O/c1-5-2-3-6(7)4-5/h4H,2-3H2,1H3
96	C6H8O	2-Cyclopenten-1-one, 2-methyl-	NMOC_g		0.0238745		0.0901455	0.046001								0.287644		InChI=1S/C6H8O/c1-5-3-2-4-6(5)7/h3H,2,4H2,1H3
96	C6H8O	2,5-Dimethylfuran	NMOC_g	0.986514	0.374347		0.259444	0.189055	0.291091							0.814759	0.297558	InChI=1S/C6H8O/c1-5-3-4-6(2)7-5/h3-4H,1-2H3
96	C6H8O	Furan, 2,3-dimethyl-	NMOC_g		0.0139268											0.0201463		InChI=1S/C6H8O/c1-5-3-4-7-6(5)2/h3-4H,1-2H3
96	C6H8O	Furan, 2,4-dimethyl-	NMOC_g		0.0246703		0.0569539	0.0721667								0.0414118		InChI=1S/C6H8O/c1-5-3-6(2)7-4-5/h3-4H,1-2H3
96	C6H8O	2-Cyclohexen-1-one	NMOC_g													0.0268617		InChI=1S/C6H8O/c7-6-4-2-1-3-5-6/h2,4H,1,3,5H2
96	C5H4O2	3-Furaldehyde	NMOC_g		0.0664507		0.0844885		0.0361386							0.0785231		InChI=1S/C5H4O2/c6-3-5-1-2-7-4-5/h1-4H
96	C5H4O2	2-Cyclopentene-1,4-dione	NMOC_g		0.0489427		0.0312892									0.0471139		InChI=1S/C5H4O2/c6-4-1-2-5(7)3-4/h1-2H,3H2
96	C5H4O2	Cyclopentenedione	NMOC_g				0.0432467		0.0208257							0.0355421		InChI=1S/C5H4O2/c6-4-2-1-3-5(4)7/h1-2H,3H2
96	C5H4O2	2-Furaldehyde	NMOC_g	2.87307	1.55494	0.763653	1.74825	1.40734	1.61632	2.11054	1.31126	2.27725				2.65586	1.68181	InChI=1S/C5H4O2/c6-4-5-2-1-3-7-5/h1-4H
96	C7H12	C7H12 isomers	NMOC_g	0.0562075						0.293013	0.117647	0.570874					0.580192	96.093377_C7H12
96	C7H12	Cycloheptene	NMOC_g		0.0525477													InChI=1S/C7H12/c1-2-4-6-7-5-3-1/h1-2H,3-7H2
96	C7H12	Vinylcyclopentane	NMOC_g		0.018663		0.019281	0.00871874								0.0121063		InChI=1S/C7H12/c1-2-7-5-3-4-6-7/h2,7H,1,3-6H2
96	C7H12	Cyclopentane, ethylidene-	NMOC_g					0.00758151								0.00807088		InChI=1S/C7H12/c1-2-7-5-3-4-6-7/h2H,3-6H2,1H3
96	C7H12	Cyclopentene, 3-ethyl-	NMOC_g		0.00523873		0.0116701	0.0122568								0.0322835		InChI=1S/C7H12/c1-2-7-5-3-4-6-7/h3,5,7H,2,4,6H2,1H3
96	C7H12	1,6-Heptadiene	NMOC_g		0.0314324		0.0362788	0.010235								0.0100886		InChI=1S/C7H12/c1-3-5-7-6-4-2/h3-4H,1-2,5-7H2
96	C7H12	3,5-Dimethylcyclopentene	NMOC_g		0.012442		0.0154756	0.0208492								0.0403544		InChI=1S/C7H12/c1-6-3-4-7(2)5-6/h3-4,6-7H,5H2,1-2H3
96	C7H12	Cyclopentene, 4,4-dimethyl-	NMOC_g		0.0206275		0.0235939	0.0470054								0.0343012		InChI=1S/C7H12/c1-7(2)5-3-4-6-7/h3-4H,5-6H2,1-2H3
96	C7H12	Cyclohexene, 4-methyl-	NMOC_g		0.012442		0.0136997	0.0101087										InChI=1S/C7H12/c1-7-5-3-2-4-6-7/h2-3,7H,4-6H2,1H3
96	C7H12	Cyclohexene, 3-methyl-	NMOC_g		0.0235743		0.0342492	0.0209755								0.050443		InChI=1S/C7H12/c1-7-5-3-2-4-6-7/h3,5,7H,2,4,6H2,1H3
96	C7H12	1-Methylcyclohexene	NMOC_g		0.018663		0.027749	0.0381603	0.0531868							0.0322835		InChI=1S/C7H12/c1-7-5-3-2-4-6-7/h5H,2-4,6H2,1H3
96	C7H12	C7H12 isomers	NMOC_g		0.119836		0.2367	0.12042								0.250197		394.88_1.069
96	CH2Cl2	Methylene chloride	NMOC_g				0.00638326				0.00167156	0.00138322				0.0221334		InChI=1S/CH2Cl2/c2-1-3/h1H2
97	C6H11N	Hexanenitrile	NMOC_g		0.0114912													InChI=1S/C6H11N/c1-2-3-4-5-6-7/h2-5H2,1H3
97	C6H11N	4-Methylpentanenitrile	NMOC_g		0.0149646		0.0207149	0.0144784	0.00208951			0.0656546				0.0156685		InChI=1S/C6H11N/c1-6(2)4-3-5-7/h6H,3-4H2,1-2H3
97	C5H7NO	unknown	NMOC_g				0.0268571	0.0124309	0.00582891			0.215685				0.0414066		97.05216_C5H7NO
97	C4H3NO2	unknown	NMOC_g		0.00861843		0.034736	0.0254469	0.0132824			0.0956607				0.0504311		97.01586_C4H3NO2
98	C7H14	unknown	NMOC_g				0.0684946	0.0450185	0.0118352									98.10896_C7H14
98	C7H14	Cyclopentane, ethyl-	NMOC_g				0.0168675	0.0271874								0.00251194		InChI=1S/C7H14/c1-2-7-5-3-4-6-7/h7H,2-6H2,1H3
98	C7H14	2-Heptene, (e)-	NMOC_g		0.0167609		0.0533563	0.0686038										InChI=1S/C7H14/c1-3-5-7-6-4-2/h3,5H,4,6-7H2,1-2H3/b5-3+
98	C7H14	2-Heptene, z	NMOC_g		0.0113038		0.0165232	0.0358264								0.00188396		InChI=1S/C7H14/c1-3-5-7-6-4-2/h3,5H,4,6-7H2,1-2H3/b5-3-
98	C7H14	1-Heptene	NMOC_g	0.120004	0.240889		0.107065	0.192726	0.125268							0.105796		InChI=1S/C7H14/c1-3-5-7-6-4-2/h3H,1,4-7H2,2H3
98	C7H14	3-Heptene, (e)-	NMOC_g		0.00233873		0.00654045	0.0205811								0.000627986		InChI=1S/C7H14/c1-3-5-7-6-4-2/h5,7H,3-4,6H2,1-2H3/b7-5+
98	C7H14	1-Hexene, 5-methyl-	NMOC_g				0.00757315	0.00825786								0.00251194		InChI=1S/C7H14/c1-4-5-6-7(2)3/h4,7H,1,5-6H2,2-3H3
98	C7H14	2-Hexene, 5-methyl-, (e)-	NMOC_g					0.00571698										InChI=1S/C7H14/c1-4-5-6-7(2)3/h4-5,7H,6H2,1-3H3/b5-4+
98	C7H14	1-Hexene, 3-methyl-	NMOC_g				0.00550775	0.00902013								0.00188396		InChI=1S/C7H14/c1-4-6-7(3)5-2/h5,7H,2,4,6H2,1,3H3
98	C7H14	3-Methyl-2-hexene (e)	NMOC_g		0.00389788		0.00550775	0.00571698								0.0043959		InChI=1S/C7H14/c1-4-6-7(3)5-2/h5H,4,6H2,1-3H3/b7-5+
98	C7H14	(z)-3-methyl-2-hexene	NMOC_g		0.0093549		0.00895009									0.00941979		InChI=1S/C7H14/c1-4-6-7(3)5-2/h5H,4,6H2,1-3H3/b7-5-
98	C7H14	1-Butene, 2-ethyl, 3-methyl	NMOC_g		0.0140324		0.0192771	0.0209623								0.0131877		InChI=1S/C7H14/c1-5-7(4)6(2)3/h6H,4-5H2,1-3H3
98	C7H14	1-Pentene, 2,3-dimethyl-	NMOC_g													0.00251194		InChI=1S/C7H14/c1-5-7(4)6(2)3/h7H,2,5H2,1,3-4H3
98	C7H14	Methylcyclohexane	NMOC_g	0.0352952			0.0212723	0.0215975	0.010296		0.0527221	0.0842799				0.0514075	0.151561	InChI=1S/C7H14/c1-7-5-3-2-4-6-7/h7H,2-6H2,1H3
98	C7H14	C7H14 isomers	NMOC_g													0.00251194		579.821_1.052
98	C6H10O	Methyl cyclopentanone + cyclohexanone + other ketones	NMOC_g		0.0953043				0.061135			0.169062					0.114218	98.07256_C6H10O
98	C6H10O	4-Hexen-2-one	NMOC_g													0.0033994		InChI=1S/C6H10O/c1-3-4-5-6(2)7/h3-4H,5H2,1-2H3/b4-3+
98	C6H10O	5-Hexen-2-one	NMOC_g				0.00867578									0.0050991		InChI=1S/C6H10O/c1-3-4-5-6(2)7/h3H,1,4-5H2,2H3
98	C6H10O	3-Hexen-2-one	NMOC_g													0.00566567		InChI=1S/C6H10O/c1-3-4-5-6(2)7/h4-5H,3H2,1-2H3/b5-4+
98	C6H10O	5-Hexen-3-one	NMOC_g													0.00283284		InChI=1S/C6H10O/c1-3-5-6(7)4-2/h3H,1,4-5H2,2H3
98	C6H10O	1-Hexen-3-one	NMOC_g													0.0033994		InChI=1S/C6H10O/c1-3-5-6(7)4-2/h4H,2-3,5H2,1H3
98	C6H10O	2-Pentanone, 3-methylene-	NMOC_g													0.0050991		InChI=1S/C6H10O/c1-4-5(2)6(3)7/h2,4H2,1,3H3
98	C6H10O	4-Penten-2-one, 3-methyl-	NMOC_g				0.00722981									0.00453254		InChI=1S/C6H10O/c1-4-5(2)6(3)7/h4-5H,1H2,2-3H3
98	C6H10O	3-Penten-2-one, 3-methyl-	NMOC_g				0.00578385											InChI=1S/C6H10O/c1-4-5(2)6(3)7/h4H,1-3H3
98	C6H10O	1-Penten-3-one, 2-methyl-	NMOC_g													0.00963164		InChI=1S/C6H10O/c1-4-6(7)5(2)3/h2,4H2,1,3H3
98	C6H10O	3-Penten-2-one, 4-methyl-	NMOC_g													0.0033994		InChI=1S/C6H10O/c1-5(2)4-6(3)7/h4H,1-3H3
98	C6H10O	3-Methylcyclopentanone	NMOC_g													0.0186967		InChI=1S/C6H10O/c1-5-2-3-6(7)4-5/h5H,2-4H2,1H3
98	C6H10O	Cyclopentanone, 2-methyl-	NMOC_g				0.039041									0.0447588		InChI=1S/C6H10O/c1-5-3-2-4-6(5)7/h5H,2-4H2,1H3
98	C6H10O	Cyclohexanone	NMOC_g				0.0204845	0.0641533								0.00963164		InChI=1S/C6H10O/c7-6-4-2-1-3-5-6/h1-5H2
98	C6H10O	4-Hexen-3-one isomers	NMOC_g													0.0152973		859.731_2.187
98	C3H2N2S	unknown	NMOC_g				0.0502545	0.0254767	0.0153539			0.0705692				0.0893242		97.99325999999989_C3H2N2S
98	C5H6S	Methyl thiophenes	NMOC_g						0.0243644			0.166777						98.01846_C5H6S
98	C5H6S	Thiophene, 3-methyl-	NMOC_g													0.0694137		InChI=1S/C5H6S/c1-5-2-3-6-4-5/h2-4H,1H3
98	C5H6S	Thiophene, 2-methyl-	NMOC_g				0.0526949	0.024811								0.0925516		InChI=1S/C5H6S/c1-5-3-2-4-6-5/h2-4H,1H3
98	C5H6O2	2-Furanmethanol + other hco2	NMOC_g		0.164923							2.29248						98.03626_C5H6O2
98	C5H6O2	2(3H)-furanone, 5-methyl-	NMOC_g				0.0115739											InChI=1S/C5H6O2/c1-4-2-3-5(6)7-4/h2H,3H2,1H3
98	C5H6O2	2-Furan methanol	NMOC_g	3.04809	0.713551		0.968332	0.418877	0.645078	0.645616	0.336023					2.6676	1.30666	InChI=1S/C5H6O2/c6-4-5-2-1-3-7-5/h1-3,6H,4H2
98	C4H2O3	unknown	NMOC_g				0.0614653	0.0655736	0.0720993			0.00888462				0.0189157		97.99986_C4H2O3
98	C4H2O3	Maleic anhydride	NMOC_g	0.384717	0.199045		0.289349		0.626341							0.312813		InChI=1S/C4H2O3/c5-3-1-2-4(6)7-3/h1-2H
99	C5H9NO	unknown	NMOC_g				0.0125969	0.0110335	0.00234684			0.133682				0.0130032		99.06815999999999_C5H9NO
99	C6H11O	unknown	NMOC_g				0.0063158	0.00415546	0.00175395			0.0108051				0.0114428		99.08015999999999_C6H12O
99	C6H13N	unknown	NMOC_g				0.00369632	0.00229267	0.000586711			0.0397026				0.00624155		99.10416_C6H13N
99	C4H5NO2	unknown	NMOC_g				0.042765	0.0524448	0.00947529			0.206554				0.0395298		99.03116_C4H5NO2
100	C5H8O2	Methyl methacrylate + other hco2	NMOC_g	0.688326						0.343258	0.514343	0.676404					0.377889	100.05216_C5H8O2
100	C5H8O2	2-Butenoic acid, methyl ester	NMOC_g													0.0276618		InChI=1S/C5H8O2/c1-3-4-5(6)7-2/h3-4H,1-2H3/b4-3+
100	C5H8O2	Unsaturated c5 carboxylic acids	NMOC_g		0.128478		0.0217173									0.0380349		InChI=1S/C5H8O2/c1-3-4-7-5(2)6/h3H,1,4H2,2H3
100	C5H8O2	2,3-Pentanedione	NMOC_g		0.0480889		0.0931558	0.10281								0.532489		InChI=1S/C5H8O2/c1-3-5(7)4(2)6/h3H2,1-2H3
100	C5H8O2	Methyl methacrylate	NMOC_g		0.0114025		0.188118		0.181403							0.0135563		InChI=1S/C5H8O2/c1-4(2)5(6)7-3/h1H2,2-3H3
100	C6H12O	Other substituted furans	NMOC_g				0.030555		0.00174865			0.0350765						100.0888_C6H12O
100	C6H12O	N-hexanal	NMOC_g		0.0260814	1.54205	0.156044	0.00906229	0.0685285						0.0351395	0.00726232	0.77044	InChI=1S/C6H12O/c1-2-3-4-5-6-7/h6H,2-5H2,1H3
100	C6H12O	2-Hexanone	NMOC_g		0.00684965		0.0293919	0.00914779	0.0643243							0.0122118		InChI=1S/C6H12O/c1-3-4-5-6(2)7/h3-5H2,1-2H3
100	C6H12O	3-Hexanone	NMOC_g				0.116333		0.138739							0.00968309		InChI=1S/C6H12O/c1-3-5-6(7)4-2/h3-5H2,1-2H3
100	C6H12O	2-Pentanone, 3-methyl-	NMOC_g					0.0172697								0.00435739		InChI=1S/C6H12O/c1-4-5(2)6(3)7/h5H,4H2,1-3H3
100	C6H12O	3-Pentanone, 2-methyl-	NMOC_g					0.00547157								0.00145246		InChI=1S/C6H12O/c1-4-6(7)5(2)3/h5H,4H2,1-3H3
100	C6H12O	4-Methyl-2-pentanone	NMOC_g				0.014506	0.00940427								0.00870598		InChI=1S/C6H12O/c1-5(2)4-6(3)7/h5H,4H2,1-3H3
100	C7H16	unknown	NMOC_g				0.0198861	0.00751852	0.00478277			0.0333351						100.12416_C7H16
100	C7H16	N-heptane	NMOC_g	0.0830142	0.0643808	0.0141566	0.0671679	0.289304	0.0611712		0.0227865	0.126887				0.0577366	1.24313	InChI=1S/C7H16/c1-3-5-7-6-4-2/h3-7H2,1-2H3
100	C7H16	Hexane, 2-methyl-	NMOC_g	0.0242125	0.00114598		0.0234393	0.135584								0.0283551		InChI=1S/C7H16/c1-4-5-6-7(2)3/h7H,4-6H2,1-3H3
100	C7H16	Hexane, 3-methyl-	NMOC_g	0.044966			0.0283052	0.231016								0.0206407		InChI=1S/C7H16/c1-4-6-7(3)5-2/h7H,4-6H2,1-3H3
100	C7H16	Pentane, 2,3-dimethyl-	NMOC_g	0.0138357	0.00343793		0.00634114	0.00933774								0.0447482		InChI=1S/C7H16/c1-5-7(4)6(2)3/h6-7H,5H2,1-4H3
100	C7H16	Pentane, 2,4-dimethyl-	NMOC_g	0.0207536			0.0354303		0.0630631							0.0497174		InChI=1S/C7H16/c1-6(2)5-7(3)4/h6-7H,5H2,1-4H3
100	C4H4O3	unknown	NMOC_g	0.217912	0.120931					0.0521818	0.0465109						0.0385053	100.01552_C4H4O3
100	C4H4O3	Dihydro furandione	NMOC_g				0.192492	0.157862	0.0452716			0.155978				0.259419		InChI=1S/C4H4O3/c5-3-1-2-4(6)7-3/h1-2H2
101	C4H7NO2	unknown	NMOC_g				0.0058274	0.00168545	0.00100338			0.0280789				0.0545518		101.04716_C4H8NO2
101	C3H3NO3	unknown	NMOC_g				0.00296667	0.000983181	0.000856576			0.00591135				0.00458847		101.01116_C3H3NO3
101	C5H11NO	unknown	NMOC_g				0.0161109	0.010815	0.00228824			0.0862072				0.0214128		101.08315999999999_C5H11NO
102	C4H6O3	Methyl pyruvate	NMOC_g	0.471024	1.11277		0.290207	0.129915	0.144144	0.45723	0.233856					0.356513	0.202798	InChI=1S/C4H6O3/c1-3(5)4(6)7-2/h1-2H3
102	C4H6O3	Acetic anhydride	NMOC_g		0.0767375		0.163971	0.0228087	0.117069			0.583144				0.637437		InChI=1S/C4H6O3/c1-3(5)7-4(2)6/h1-2H3
102	C5H10O2	unknown	NMOC_g	0.0149209				0.128702				0.440468					0.0675994	102.06716_C5H10O2
102	C5H10O2	Valeric acid	NMOC_g		0.0823312													InChI=1S/C5H10O2/c1-2-3-4-5(6)7/h2-4H2,1H3,(H,6,7)
102	C5H10O2	Methyl butanoate	NMOC_g				0.0395646		0.025405							0.0881329		InChI=1S/C5H10O2/c1-3-4-5(6)7-2/h3-4H2,1-2H3
102	C8H6	Phenylacetylene	NMOC_g	0.0932553	0.0996175		0.104547	0.0105699	0.12288	0.50679		0.0185357				0.230593		InChI=1S/C8H6/c1-2-8-6-4-3-5-7-8/h1,3-7H
102	C6H14O	unknown	NMOC_g				0.0177088	0.00152985	0.00342873			0.0360959				0.0787537		102.10416_C6H14O
103	C7H5N	Benzonitrile	NMOC_g	0.245147	0.119732		0.135604	0.114395	0.124368			0.222443				0.150737		InChI=1S/C7H5N/c8-6-7-4-2-1-3-5-7/h1-5H
103	C3H5NO3	Propanone nitrate	NMOC_g				0.0113323											InChI=1S/C3H6NO4/c1-3(5)2-8-4(6)7/h2H2,1H3,(H,6,7)/q+1
103	C4H9NO2	unknown	NMOC_g		0.00811638													103.121_C4H9NO2
103	C5H13NO	unknown	NMOC_g				0.00341095	0.00674863	0.000851834			0.0149745				0.0049993		103.09916_C5H13NO
104	C8H8	Styrene	NMOC_g	0.354872	0.295973		0.23483	0.0946741	0.257503	0.493124	0.161896	0.277946				0.189187	7.88322	InChI=1S/C8H8/c1-2-8-6-4-3-5-7-8/h2-7H,1H2
104	C8H8	C8H8 isomers	NMOC_g		0.0069787		0.00518999									0.000954719		1219.62_1.888
104	C7H4O	unknown	NMOC_g				0.0358887	0.0900258	0.010588			0.0834812				0.040105		104.02516_C7H4O
104	C4H8OS	Oxathiane	NMOC_g		0.00830628													InChI=1S/C4H8OS/c1-3-6-4-2-5-1/h1-4H2
104	C5H12O2	1,5-Pentanediol	NMOC_g		0.00777039													InChI=1S/C5H12O2/c6-4-2-1-3-5-7/h6-7H,1-5H2
104	C3H4O4	unknown	NMOC_g				0.00542439	0.00272806	0.00125369							0.00495123		104.01016_C3H4O4
104	C4H8O3	C4-dihydroxycarbonyls	NMOC_g				0.131874											104.09133999999999_C2H4O3
105	C7H7N	Vinylpyridine	NMOC_g				0.0175041	0.00662008	0.00426677			0.0381446				0.0063753		InChI=1S/C7H7N/c1-2-7-5-3-4-6-8-7/h2-6H,1H2
105	C2H3NO4	Ethanal nitrate	NMOC_g				0.00750358											InChI=1S/C2H3NO4/c1-2(4)7-3(5)6/h1H3
105	C3H7NO3	N-propyl nitrate	NMOC_g	0.00131439	0.000811095	0.000722273	0.000807535		0.000936937		0.000509429	0.00266983				0.000659919		InChI=1S/C3H7NO3/c1-2-3-7-4(5)6/h2-3H2,1H3
105	C3H7NO3	Isopropyl nitrate	NMOC_g		0.00424628	0.00240758	0.00472393				0.00152829	0.00857157						InChI=1S/C3H7NO3/c1-3(2)7-4(5)6/h3H,1-2H3
105	C5H15NO	unknown	NMOC_g				0.00116912	0.000810622				0.00379077				0.000980815		105.11516_C5H15NO
105	C8H9	unknown	NMOC_g				0.00357786	0.0037829	0.00110637			0.00355385				0.00392326		105.07016_C8H10
106	C8H10	Ethyl benzene + m-xylene + p-xylene + o-xylene	NMOC_g							0.546124								106.07816_C8H10
106	C8H10	Ethylbenzene	NMOC_g	0.146038	0.181279	0.112145	0.133901	0.15642	0.119328		0.108139	0.391637			0.0949201	0.116141	1.26611	InChI=1S/C8H10/c1-2-8-6-4-3-5-7-8/h3-7H,2H2,1H3
106	C8H10	P-xylene	NMOC_g	0.00486793		0.0548897									0.0163746			InChI=1S/C8H10/c1-7-3-5-8(2)6-4-7/h3-6H,1-2H3
106	C8H10	M-xylene	NMOC_g	0.0176173		0.0878236									0.0409366			InChI=1S/C8H10/c1-7-4-3-5-8(2)6-7/h3-6H,1-2H3
106	C8H10	O-xylene	NMOC_g	0.0419977	0.158762	0.0548897	0.117144	0.227577	0.0926906		0.0884411	0.270138			0.024562	0.0948021	0.522315	InChI=1S/C8H10/c1-7-5-3-4-6-8(7)2/h3-6H,1-2H3
106	C8H10	C8H10 isomers	NMOC_g		0.0126129		0.0171857									0.00281012		1039.67_1.641
106	C4H10O3	unknown	NMOC_g				0.0245547	0.0297101	0.00504269			0.0790898				0.0286611		106.06215999999999_C4H10O3
106	C4H10O3	Diethylene glycol	NMOC_g		0.00946401													InChI=1S/C4H10O3/c5-1-3-7-4-2-6/h5-6H,1-4H2
106	C7H6O	Benzaldehyde	NMOC_g	0.395166	0.227701		0.445097	0.0604004	0.456502	0.235372	0.108689	0.243606				0.361913	2.14089	InChI=1S/C7H6O/c8-6-7-4-2-1-3-5-7/h1-6H
106	C2H2O5	unknown	NMOC_g				0.00200182	0.000669146	0.000547966			0.0018775				0.000971562		105.99016_C2H2O5
107	C7H9N	Dimethyl pyridine + ethylpyridine + heptylnitriles	NMOC_g		0.00468778		0.0295787	0.0282392	0.00661264			0.163909				0.0235808		107.07316_C7H9N
107	C2H5NO2S	unknown	NMOC_g				0.000892767	0.000265157	0.00174994			0.00116247				0.00144372		107.00316_C2H6NO2S
107	C2H5NO4	Ethene hydroxynitrate	NMOC_g	0.00646528			0.0124406									0.00454764		InChI=1S/C2H5NO4/c1-2(3)7-5-4-6/h2,6H,1H2,(H,4,5)
107	C3H9NO3	unknown	NMOC_g				0.0151919	0.00848502	0.00364417			0.0416165				0.0202121		107.05816_C3H9NO3
107	C6H5NO	Pyridine aldehyde + methylfuronitrile + nitrosobenzene	NMOC_g				0.0234305	0.01697	0.00623699			0.0506838				0.0303182		107.03616_C6H5NO
107	C6H5NO	Pyridine aldehyde	NMOC_g		0.00390648													InChI=1S/C6H5NO/c8-5-6-3-1-2-4-7-6/h1-5H
108	C8H12	unknown	NMOC_g						0.121628	0.040767	0.0402804	0.351732				0.110512	0.446907	108.09316_C8H12
108	C8H12	Cyclooctadiene	NMOC_g		0.128188													InChI=1S/C8H12/c1-2-4-6-8-7-5-3-1/h1-4H,5-8H2/b3-1-,4-2-
108	C8H12	C8H12 isomers	NMOC_g		0.32684		0.194981	0.329018										874.726_1.276
108	C2H2Cl2	1,2-Dichloroethene	NMOC_g								0.000495279	0.00457105				0.000450554	0.247151	InChI=1S/C2H2Cl2/c3-1-2-4/h1-2H
108	C6H4O2	unknown	NMOC_g	0.00736623														108.020606_C6H4O2
108	C6H4O2	Quinone (=p-benzoquinone)	NMOC_g		0.0645052		0.315243	0.0643619	1.38738			0.164464				0.280044		InChI=1S/C6H4O2/c7-5-1-2-6(8)4-3-5/h1-4H
108	C7H8O	2-Methylphenol (=o-cresol) + anisol	NMOC_g							0.249887	0.055585	2.57338					0.0621856	108.05716_C7H8O
108	C7H8O	Furan, 2-(2-propenyl)-	NMOC_g				0.00562249									0.00413712		InChI=1S/C7H8O/c1-2-4-7-5-3-6-8-7/h2-3,5-6H,1,4H2
108	C7H8O	Furan, 2-(1-propenyl)-	NMOC_g													0.00275808		InChI=1S/C7H8O/c1-2-4-7-5-3-6-8-7/h2-6H,1H3
108	C7H8O	Cyclopentanone, 3,4-bis(methylene)-	NMOC_g													0.00413712		InChI=1S/C7H8O/c1-5-3-7(8)4-6(5)2/h1-4H2
108	C7H8O	Phenol, 2-methyl	NMOC_g	0.704596	0.200312		0.410671	0.370338	0.410939							0.700764		InChI=1S/C7H8O/c1-6-4-2-3-5-7(6)8/h2-5,8H,1H3
108	C7H8O	Anisole	NMOC_g		0.0404476		0.045995									0.0231163		InChI=1S/C7H8O/c1-8-7-5-3-2-4-6-7/h2-6H,1H3
108	C7H8O	Phenol, 3+4-methyl	NMOC_g		0.0654338		0.0844935									0.124573		1579.5_0.959
108	C6H8N2	2-Ethylpyrazine	NMOC_g				0.0314322		0.0159604									InChI=1S/C6H8N2/c1-2-6-5-7-3-4-8-6/h3-5H,2H2,1H3
109	C6H5O2	unknown	NMOC_g		0.00766961		0.0675741	0.0144462	0.0155291			0.0342343				0.0831443		109.02816_C6H5O2
109	C7H11N	C7 acrylonitrile	NMOC_g				0.0202693	0.0141859	0.00331648			0.102931				0.0226757		109.08816_C7H11N
109	C6H7NO	unknown	NMOC_g				0.0374125	0.0255086	0.00983588			0.304913				0.0628306		109.05216_C6H7NO
110	C6H6O2	5-Methyl furfural +benzene diols (=catechol, resorcinol)	NMOC_g	2.85267						0.372092	0.490485	2.83597					0.612178	110.03616_C6H6O2
110	C6H6O2	Furan, 2-acetyl-	NMOC_g		0.0229195		0.0363417									0.0794326		InChI=1S/C6H6O2/c1-5(7)6-3-2-4-8-6/h2-4H,1H3
110	C6H6O2	5-Methyl furfural	NMOC_g		0.311566		0.0451155	0.527591								2.33716		InChI=1S/C6H6O2/c1-5-2-3-6(4-7)8-5/h2-4H,1H3
110	C6H6O2	Resorcinol	NMOC_g				3.9646		1.32007									InChI=1S/C6H6O2/c7-5-2-1-3-6(8)4-5/h1-4,7-8H
110	C6H6O2	Catechol	NMOC_g				0.746061											InChI=1S/C6H6O2/c7-5-3-1-2-4-6(5)8/h1-4,7-8H
110	C7H10O	C3 furan + various hco	NMOC_g	0.333315					0.0805371	0.081534	0.244209	0.691352					0.183165	110.07216_C7H10O
110	C7H10O	Furan, 2-propyl-	NMOC_g		0.0115002		0.0228836									0.00779112		InChI=1S/C7H10O/c1-2-4-7-5-3-6-8-7/h3,5-6H,2,4H2,1H3
110	C7H10O	Furan, 2-ethyl-5-methyl-	NMOC_g		0.062101		0.0594973	0.0693833								0.116867		InChI=1S/C7H10O/c1-3-7-5-4-6(2)8-7/h4-5H,3H2,1-2H3
110	C7H10O	2-Cyclopenten-1-one, 2,3-dimethyl-	NMOC_g													0.0642767		InChI=1S/C7H10O/c1-5-3-4-7(8)6(5)2/h3-4H2,1-2H3
110	C7H10O	2-Cyclopenten-1-one, 3,4-dimethyl-	NMOC_g				0.0469113									0.0876501		InChI=1S/C7H10O/c1-5-3-7(8)4-6(5)2/h3,6H,4H2,1-2H3
110	C7H10O	Furan, 2,3,5-trimethyl-	NMOC_g		0.0345006		0.0200231	0.0356553								0.0253211		InChI=1S/C7H10O/c1-5-4-6(2)8-7(5)3/h4H,1-3H3
110	C7H10O	3-Methyl-3-cyclohexen-1-one	NMOC_g													0.03506		InChI=1S/C7H10O/c1-6-3-2-4-7(8)5-6/h3H,2,4-5H2,1H3
110	C7H10O	C7H10O isomers	NMOC_g													0.0311645		1514.52_2.917
110	C8H14	unknown	NMOC_g	0.0600595						0.0148244		0.295131						110.109027_C8H14
110	C8H14	Cyclooctene	NMOC_g		0.0184536													InChI=1S/C8H14/c1-2-4-6-8-7-5-3-1/h1-2H,3-8H2/b2-1-
110	C8H14	Cyclopentene, 3-propyl-	NMOC_g		0.00661152		0.00354547	0.0153745										InChI=1S/C8H14/c1-2-5-8-6-3-4-7-8/h3,6,8H,2,4-5,7H2,1H3
110	C8H14	Cyclohexane, ethylidene-	NMOC_g				0.00563104	0.0139103										InChI=1S/C8H14/c1-2-8-6-4-3-5-7-8/h2H,3-7H2,1H3
110	C8H14	Octadiene	NMOC_g				0.0813365		0.059715									InChI=1S/C8H14/c1-3-5-7-8-6-4-2/h3,5,7H,1,4,6,8H2,2H3/b7-5+
110	C8H14	1,7-Octadiene	NMOC_g		0.0181098		0.0241926	0.0173879								0.0143364		InChI=1S/C8H14/c1-3-5-7-8-6-4-2/h3-4H,1-2,5-8H2
110	C8H14	1-Ethyl-5-methylcyclopentene	NMOC_g		0.00373695		0.00479682	0.0106157								0.00537617		InChI=1S/C8H14/c1-3-8-6-4-5-7(8)2/h6-7H,3-5H2,1-2H3
110	C8H14	C8H14 isomers	NMOC_g		0.0580664		0.117001	0.142763								0.0680981		689.786_1.082
110	C2H4Cl2	1,2-Dichloroethane	NMOC_g		0.00151998		0.00212223				0.00364705	0.00321913						InChI=1S/C2H4Cl2/c3-1-2-4/h1-2H2
111	C6H9NO	unknown	NMOC_g				0.015312	0.00664564	0.00145834			0.162036				0.0282978		111.06815999999999_C6H9NO
111	C7H11O	unknown	NMOC_g				0.00495566	0.00434523	0.00143075			0.00224116				0.00278339		111.08015999999999_C7H12O
111	C5H5NO2	Dihydroxy pyridine + methyl maleimide	NMOC_g		0.00652723		0.0444335	0.0268382	0.00499325			0.0880778				0.0436065		111.03116_C5H5NO2
112	C5H4O3	5-Hydroxy 2-furfural/2-furoic acid	NMOC_g	0.644842	0.246003		0.354536	0.201323	0.133726	0.0640624	0.1083	0.510865				0.592883	0.339	112.01516_C5H4O3
112	C6H8O2	2-Hydroxy-3-methyl-2-cyclopenten-1-one	NMOC_g	0.940704	0.523755		0.641	0.180686	0.2566	0.289737	0.433876	1.22119				1.62321	0.442939	InChI=1S/C6H8O2/c1-4-2-3-5(7)6(4)8/h8H,2-3H2,1H3
112	C6H8O2	Cyclohexanedione	NMOC_g		0.0348328													InChI=1S/C6H8O2/c7-5-3-1-2-4-6(5)8/h1-4H2
112	C7H12O	Ethylcyclopentanone	NMOC_g		0.0174164		0.0420632	0.0417977	0.00723867			0.0761856				0.0461314		InChI=1S/C7H12O/c1-2-6-4-3-5-7(6)8/h6H,2-5H2,1H3
112	C8H16	unknown	NMOC_g					0.0300184	0.00892689			0.109947						112.12416_C8H16
112	C8H16	Cyclopentane, propyl-	NMOC_g		0.00238745		0.0043112	0.0100047										InChI=1S/C8H16/c1-2-5-8-6-3-4-7-8/h8H,2-7H2,1H3
112	C8H16	Cyclohexane, ethyl-	NMOC_g		0.00204638		0.00274349	0.0112275										InChI=1S/C8H16/c1-2-8-6-4-3-5-7-8/h8H,2-7H2,1H3
112	C8H16	2-Octene, (e)-	NMOC_g		0.0115962		0.0127377	0.0276797								0.00328138		InChI=1S/C8H16/c1-3-5-7-8-6-4-2/h3,5H,4,6-8H2,1-2H3/b5-3+
112	C8H16	2-Octene, (z)-	NMOC_g		0.00648022		0.00627084	0.017675								0.00131255		InChI=1S/C8H16/c1-3-5-7-8-6-4-2/h3,5H,4,6-8H2,1-2H3/b5-3-
112	C8H16	1-Octene	NMOC_g	0.0710315	0.113915		0.0745806	0.140511	0.107357							0.0793334		InChI=1S/C8H16/c1-3-5-7-8-6-4-2/h3H,1,4-8H2,2H3
112	C8H16	3-Octene, (e)-	NMOC_g		0.00579809		0.00391928	0.0113387										InChI=1S/C8H16/c1-3-5-7-8-6-4-2/h5,7H,3-4,6,8H2,1-2H3/b7-5+
112	C8H16	Cyclopentane, 1-ethyl-2-methyl-, cis-	NMOC_g					0.00277909										InChI=1S/C8H16/c1-3-8-6-4-5-7(8)2/h7-8H,3-6H2,1-2H3/t7-,8+/m1/s1
112	C8H16	1-Heptene, 2-methyl-	NMOC_g				0.00352735	0.00878192								0.00131255		InChI=1S/C8H16/c1-4-5-6-7-8(2)3/h2,4-7H2,1,3H3
112	C8H16	2-Heptene, 6-methyl- (e)	NMOC_g					0.00900425								0.00328138		InChI=1S/C8H16/c1-4-5-6-7-8(2)3/h4-5,8H,6-7H2,1-3H3/b5-4+
112	C8H16	3-Heptene, 2-methyl-, (e)-	NMOC_g		0.0047749			0.00433538										InChI=1S/C8H16/c1-4-5-6-7-8(2)3/h6-8H,4-5H2,1-3H3/b7-6+
112	C8H16	2-Methyl-2-heptene	NMOC_g		0.00545703		0.00352735	0.013562								0.00262511		InChI=1S/C8H16/c1-4-5-6-7-8(2)3/h7H,4-6H2,1-3H3
112	C8H16	3-Heptene, 2-methyl-(z)	NMOC_g					0.00566934										InChI=1S/C8H16/c1-4-6-7-8(3)5-2/h5H,4,6-7H2,1-3H3/b8-5-
112	C8H16	1-Pentene, 3-ethyl-3-methyl-	NMOC_g					0.00400189										InChI=1S/C8H16/c1-5-8(4,6-2)7-3/h5H,1,6-7H2,2-4H3
112	C8H16	1-Hexene, 2,5-dimethyl-	NMOC_g		0.00409277		0.00313542	0.0153406								0.00196883		InChI=1S/C8H16/c1-7(2)5-6-8(3)4/h8H,1,5-6H2,2-4H3
112	C8H16	Cyclohexane, 1,4-dimethyl-	NMOC_g		0.00409277		0.0048991	0.010894								0.00328138		InChI=1S/C8H16/c1-7-3-5-8(2)6-4-7/h7-8H,3-6H2,1-2H3
112	C8H16	Cyclohexane, 1,3-dimethyl-, trans-	NMOC_g					0.00333491										InChI=1S/C8H16/c1-7-4-3-5-8(2)6-7/h7-8H,3-6H2,1-2H3/t7-,8-/m1/s1
112	C8H16	C8H16 isomers	NMOC_g					0.0112275										634.803_1.034
113	C7H15N	unknown	NMOC_g				0.00191036	0.0022597	0.000510408			0.0198135				0.00273413		113.12016_C7H15N
113	C6H11NO	unknown	NMOC_g				0.00535163	0.00401724	0.000896827			0.0512949				0.00546826		113.08315999999999_C6H11NO
113	C5H7NS	unknown	NMOC_g				0.0104531	0.00401724	0.00191945			0.0376456				0.0287084		113.02916_C5H8NS
113	C5H7NO2	unknown	NMOC_g				0.0300898	0.0355275	0.00511853			0.187127				0.0305311		113.04716_C5H7NO2
113	C4H3NO3	Nitrofuran	NMOC_g				0.00918722	0.00125539	0.00153664			0.00374255				0.00911377		InChI=1S/C4H3NO3/c6-5(7)4-2-1-3-8-4/h1-3H
114	C8H18	N-octane	NMOC_g	0.0394439	0.0309949		0.0484525	0.153718	0.0442548		0.0359001	0.0560252				0.0637755	0.693932	InChI=1S/C8H18/c1-3-5-7-8-6-4-2/h3-8H2,1-2H3
114	C8H18	Heptane, 2-methyl-	NMOC_g				0.0376276	0.037351										InChI=1S/C8H18/c1-4-5-6-7-8(2)3/h8H,4-7H2,1-3H3
114	C8H18	Heptane, 3-methyl-	NMOC_g				0.0189418	0.00185663										InChI=1S/C8H18/c1-4-6-7-8(3)5-2/h8H,4-7H2,1-3H3
114	C8H18	Hexane, 2,3-dimethyl-	NMOC_g													0.000435486		InChI=1S/C8H18/c1-5-6-8(4)7(2)3/h7-8H,5-6H2,1-4H3
114	C8H18	2,3,4-Trimethylpentane	NMOC_g				0.01715											InChI=1S/C8H18/c1-6(2)8(5)7(3)4/h6-8H,1-5H3
114	C8H18	Pentane,2,3,3-trimethyl	NMOC_g		0.000670161			0.00567909										InChI=1S/C8H18/c1-6-8(4,5)7(2)3/h7H,6H2,1-5H3
114	C8H18	Hexane, 2,5-dimethyl-	NMOC_g				0.000887762											InChI=1S/C8H18/c1-7(2)5-6-8(3)4/h7-8H,5-6H2,1-4H3
114	C8H18	Pentane, 2,2,4-trimethyl-	NMOC_g	0.0121366	0.0157488		0.0221821		0.0110637			0.165512				0.329947		InChI=1S/C8H18/c1-7(2)6-8(3,4)5/h7H,6H2,1-5H3
114	C6H10O2	C6 diones + c6 1-dbe esters	NMOC_g						0.0306308			0.156899						114.06716_C6H10O2
114	C6H10O2	2-Vinylethyl acetate	NMOC_g		0.0268414													InChI=1S/C6H10O2/c1-3-4-5-8-6(2)7/h3H,1,4-5H2,2H3
114	C6H10O2	caprolactone/C6 esters/ C6 diketone isomers	NMOC_g		0.102623		0.0430934	0.038386								0.111622		664.794_1.738
114	C7H14O	Heptanal + 2,4-dimethyl-3-pentanone + heptanone	NMOC_g		0.00953319				0.00648822			0.0794316						114.10416_C7H14O
114	C7H14O	Heptanal	NMOC_g		0.0234556		0.024841	0.0143414										InChI=1S/C7H14O/c1-2-3-4-5-6-7-8/h7H,2-6H2,1H3
114	C7H14O	2-Heptanone	NMOC_g				0.00685269	0.0070883								0.0233166		InChI=1S/C7H14O/c1-3-4-5-6-7(2)8/h3-6H2,1-2H3
114	C7H14O	3-Pentanone, 2,4-dimethyl	NMOC_g		0.0177593			0.00659377								0.0349749		InChI=1S/C7H14O/c1-5(2)7(8)6(3)4/h5-6H,1-4H3
114	C5H6O3	unknown	NMOC_g	2.33235	0.559954					0.231013	0.288947						0.547495	114.031171_C5H6O3
114	C5H6O3	5-Hydroxymethyl-2[3h]-furanone	NMOC_g				0.536798	0.187003	0.26859			1.50658				1.57164		InChI=1S/C5H6O3/c6-3-4-1-2-5(7)8-4/h1,6H,2-3H2
115	C4H5NO3	unknown	NMOC_g				0.00581962	0.00308389	0.00226754			0.00886916				0.00671645		115.02616_C4H5NO3
115	C5H9NO2	unknown	NMOC_g				0.00464223	0.00259047	0.00150992			0.0294197				0.00761198		115.06316_C5H9NO2
115	C6H13NO	unknown	NMOC_g				0.0106526	0.00629113	0.00163353			0.0616515				0.0134329		115.09916_C6H13NO
116	C4H4O4	unknown	NMOC_g				0.0201268	0.0125961	0.0114587			0.0180143				0.0332927		116.01016_C4H4O4
116	C5H8O3	5-Hydroxymethyl tetrahydro 2-furanone + 5-hydroxy tetrahydro 2-furfural	NMOC_g	0.568337	0.214617		0.349226	0.029965	0.179387	0.561601	0.227306	0.620422				1.75781	0.07488	116.04716_C5H8O3
116	C6H12O2	C6 esters	NMOC_g		0.0494832			0.0604534	0.0422376	0.0492016	0.0286682	0.107657					0.197622	116.08315999999999_C6H12O2
116	C6H12O2	N-butyl acetate	NMOC_g				0.0251515									0.0101751		InChI=1S/C6H12O2/c1-3-4-5-8-6(2)7/h3-5H2,1-2H3
116	C9H8	Indene + propynyl benzene isomer	NMOC_g	0.0727567						0.728183	0.180156	0.0628357					0.746485	116.06215999999999_C9H8
116	C9H8	Indene	NMOC_g		0.172884		0.176373	0.0372674	0.0799063							0.0712771		InChI=1S/C9H8/c1-2-5-9-7-3-6-8(9)4-1/h1-6H,7H2
116	C9H8	Benzene,1-ethynyl-2-methyl-	NMOC_g		0.0135014		0.048446									0.00197992		InChI=1S/C9H8/c1-3-9-7-5-4-6-8(9)2/h1,4-7H,2H3
116	C6H12S	Cyclohexanethiol	NMOC_g		0.00768724													InChI=1S/C6H12S/c7-6-4-2-1-3-5-6/h6-7H,1-5H2
116	C7H16O	unknown	NMOC_g				0.0259097	0.00269043	0.00638691			0.0514695				0.199756		116.11916_C7H16O
117	C3H3NO4	unknown	NMOC_g				0.00138486	0.000606235	0.000496448			0.00170099				0.00176044		117.00516_C3H3NO4
117	C8H7N	Benzeneacetonitrile	NMOC_g				0.0299689	0.0225519	0.0110015			0.131401				0.0171643		InChI=1S/C8H7N/c9-7-6-8-4-2-1-3-5-8/h1-5H,6H2
117	C4H7NO3	Butene nitrates	NMOC_g				0.00965654	0.00691108	0.00359139			0.0206245				0.0184846		117.04216_C4H7NO3
118	C9H10	Indane + methyl styrenes + propenyl benzenes	NMOC_g	0.04309						0.182415	0.0391912	0.158959					0.163158	118.07816_C9H10
118	C9H10	Indane	NMOC_g		0.0145299		0.0208872	0.0242589	0.0212586							0.0086242		InChI=1S/C9H10/c1-2-5-9-7-3-6-8(9)4-1/h1-2,4-5H,3,6-7H2
118	C9H10	2-Propenylbenzene	NMOC_g		0.0123504		0.0161164	0.0109496	0.0146611							0.00487455		InChI=1S/C9H10/c1-2-6-9-7-4-3-5-8-9/h2-5,7-8H,1,6H2
118	C9H10	Benzene, 1-propenyl, trans	NMOC_g		0.0181624		0.025064	0.0186898								0.00899917		InChI=1S/C9H10/c1-2-6-9-7-4-3-5-8-9/h2-8H,1H3
118	C9H10	1-Propenylbenzene	NMOC_g				0.00554892		0.0112402									InChI=1S/C9H10/c1-2-6-9-7-4-3-5-8-9/h2-8H,1H3/b6-2+
118	C9H10	Cis-1-propenylbenzene	NMOC_g		0.00896012		0.0117121	0.0077402								0.00449958		InChI=1S/C9H10/c1-2-6-9-7-4-3-5-8-9/h2-8H,1H3/b6-2-
118	C9H10	3-Methylstyrene	NMOC_g		0.107764		0.0633777	0.0412496	0.0488704							0.0371216		InChI=1S/C9H10/c1-3-9-6-4-5-8(2)7-9/h3-7H,1H2,2H3
118	C9H10	4-Methylstyrene	NMOC_g		0.0256695		0.0243375		0.0151498							0.00899917		InChI=1S/C9H10/c1-3-9-6-4-8(2)5-7-9/h3-7H,1H2,2H3
118	C9H10	2-Methylstyrene	NMOC_g				0.0302941		0.0329875									InChI=1S/C9H10/c1-3-9-7-5-4-6-8(9)2/h3-7H,1H2,2H3
118	C9H10	Alpha-methylstyrene	NMOC_g		0.0302707		0.0184849	0.00613552	0.0114845							0.0086242		InChI=1S/C9H10/c1-8(2)9-6-4-3-5-7-9/h3-7H,1H2,2H3
118	C8H6O	Benzofuran	NMOC_g	0.218235	0.0944401		0.36314	0.0511227	0.169298	0.0849888	0.0425466	0.15137				0.20816	1.07642	InChI=1S/C8H6O/c1-2-4-8-7(3-1)5-6-9-8/h1-6H
118	C4H6O4	unknown	NMOC_g				0.0290799	0.0150274	0.008824			0.0183415				0.0318557		118.02616_C4H6O4
118	C4H6O4	Succinic acid	NMOC_g		0.00401463													InChI=1S/C4H6O4/c5-3(6)1-2-4(7)8/h1-2H2,(H,5,6)(H,7,8)
118	C5H10O3	Isoprene hydroxy hydroperoxides/isoprene epoxydiols	NMOC_g				0.100937	0.0106995	0.00428375			0.0438508				0.0183279		118.11799999999998_C5H10O3
119	C7H5NO	unknown	NMOC_g				0.01357	0.0129938	0.00413859			0.0526805				0.02553		119.03616_C7H5NO
119	C8H9N	Dihydro pyridine	NMOC_g		0.00374672		0.00514301	0.00357628	0.00133457			0.0284308				0.00173085		119.07316_C8H9N
119	C4H9NO3	Isobutyl nitrate + 2-butyl nitrate	NMOC_g					0.00178814	0.00169807							0.0263955		119.058244_C4H9NO3
119	C4H9NO3	2-Butyl nitrate	NMOC_g		0.00431113	0.0012746	0.00263651	0.0125549			0.00179799	0.00947881						InChI=1S/C4H9NO3/c1-3-4(2)8-5(6)7/h4H,3H2,1-2H3
119	C6H17NO	unknown	NMOC_g				0.000750942	0.000596046				0.0033448				0.00216356		119.13016_C6H17NO
119	C9H11	unknown	NMOC_g				0.00213687	0.00202656	0.000488104			0.00459909				0.00216356		119.08516_C9H12
120	C3H4O5	unknown	NMOC_g				0.00467343	0.00189145	0.00132345			0.002695				0.00128732		120.00516_C3H4O5
120	C4H8O4	unknown	NMOC_g				0.0297109	0.0106394	0.00842981			0.0696554				0.0982654		120.04216_C4H8O4
120	C6H16O2	unknown	NMOC_g				0.0157858	0.00177324	0.00277555			0.0609485				0.0849631		120.11416_C6H16O2
120	C8H8O	Tolualdehydes	NMOC_g		0.0580547							0.853071						120.05716_C8H8O
120	C8H8O	Benzofuran, 2,3-dihydro-	NMOC_g													0.00438525		InChI=1S/C8H8O/c1-2-4-8-7(3-1)5-6-9-8/h1-4H,5-6H2
120	C8H8O	Vinylphenol	NMOC_g	0.731563	0.547499		0.39185	0.112159	0.225656	0.120942	0.342445					1.0809	0.188796	InChI=1S/C8H8O/c1-2-7-5-3-4-6-8(7)9/h2-6,9H,1H2
120	C8H8O	Acetophenone	NMOC_g		0.0127331		0.0075833	0.0116768								0.0191356		InChI=1S/C8H8O/c1-7(9)8-5-3-2-4-6-8/h2-6H,1H3
120	C8H8O	Benzeneacetaldehyde	NMOC_g		0.00413824		0.00664838									0.00318927		InChI=1S/C8H8O/c9-7-6-8-4-2-1-3-5-8/h1-5,7H,6H2
120	C8H8O	Benzaldehyde, 2+3-methyl-	NMOC_g		0.0646203		0.0525637									0.0291021		1604.49_3.247
120	C9H12	Trimethylbenzene;assorted hcs	NMOC_g							0.127737						0.17881		120.093377_C9H12
120	C9H12	N-propylbenzene	NMOC_g	0.0194462	0.0261598		0.0163069	0.0252671	0.0215213		0.0334546	0.0420627				0.011781	0.0902131	InChI=1S/C9H12/c1-2-6-9-7-4-3-5-8-9/h3-5,7-8H,2,6H2,1H3
120	C9H12	3-Ethyltoluene	NMOC_g	0.0324103	0.0295688		0.0428645	0.0225405	0.0214826		0.0655723	0.0799156				0.111647	0.103643	InChI=1S/C9H12/c1-3-9-6-4-5-8(2)7-9/h4-7H,3H2,1-2H3
120	C9H12	4-Ethyltoluene	NMOC_g	0.0194462	0.0182341		0.0303108	0.0196185	0.0190957		0.0396472	0.047035				0.0353942	0.0516754	InChI=1S/C9H12/c1-3-9-6-4-8(2)5-7-9/h4-7H,3H2,1-2H3
120	C9H12	2-Ethyltoluene	NMOC_g	0.0194462	0.0254986		0.0237955	0.0405176	0.0249702		0.0366547	0.0448981				0.0542949	0.0671489	InChI=1S/C9H12/c1-3-9-7-5-4-6-8(9)2/h4-7H,3H2,1-2H3
120	C9H12	1,2,4-Trimethylbenzene	NMOC_g	0.0259282	0.0380034		0.0703279	0.0656494	0.0366966		0.032666	0.0643156				0.107771	0.0698949	InChI=1S/C9H12/c1-7-4-5-8(2)9(3)6-7/h4-6H,1-3H3
120	C9H12	1,3,5-Trimethylbenzene	NMOC_g		0.0114554		0.0247555	0.0126787	0.0252461		0.0198018	0.0273077				0.0275975	0.0980958	InChI=1S/C9H12/c1-7-4-8(2)6-9(3)5-7/h4-6H,1-3H3
120	C9H12	1,2,3-Trimethylbenzene	NMOC_g		0.0580383		0.0932449	0.0559486	0.0436814		0.0199933	0.0345954				0.303845	0.0443767	InChI=1S/C9H12/c1-7-5-4-6-8(2)9(7)3/h4-6H,1-3H3
120	C9H12	Isopropylbenzene	NMOC_g	0.0194462	0.0307376		0.0140323	0.00460222	0.0145605		0.0333419	0.0200047				0.00446869	0.0618938	InChI=1S/C9H12/c1-8(2)9-6-4-3-5-7-9/h3-8H,1-2H3
120	C9H12	C9H12 isomers	NMOC_g		0.00810662													1014.68_1.267
121	C3H7NO4	Propene hydroxynitrates	NMOC_g					0.00668261	0.00191508			0.0117189						121.07051_C3H7NO4
121	C3H7NO4	Propene hydroxynitrate	NMOC_g	0.00571723			0.011255									0.00879835		InChI=1S/C3H7NO4/c1-2-3(4,5)8-6/h6H,2H2,1H3
121	C4H11NO3	unknown	NMOC_g				0.00521466	0.00410336	0.00143505			0.0102797				0.00340448		121.07316_C4H11NO3
121	C6H3NO2	unknown	NMOC_g				0.00231203	0.00246201	0.000837533			0.00267273				0.00255336		121.01616_C6H3O2N
121	C7H7NO	unknown	NMOC_g				0.0197151	0.0168824	0.00551535			0.0785371				0.0272359		121.05216_C7H7NO
121	C8H11N	unknown	NMOC_g				0.0124326	0.00832395	0.002385			0.117394				0.0119157		121.08816_C8H11N
122	C7H6O2	Benzoic acids/hydroxybenzaldehyde	NMOC_g		0.0456824													122.123_C7H6O2
122	C7H6O2	1,3-Benzodioxole	NMOC_g		0.011585											0.00529008		InChI=1S/C7H6O2/c1-2-4-7-6(3-1)8-5-9-7/h1-4H,5H2
122	C7H6O2	2-Hydroxybenzaldehyde (=salicylaldehyde)	NMOC_g	0.186839	0.242632		0.172836	0.226322	0.12487	0.0882171	0.112956	0.171692				0.179663	0.151203	InChI=1S/C7H6O2/c8-5-6-3-1-2-4-7(6)9/h1-5,9H
122	C9H14	unknown	NMOC_g	0.0504663					0.0656851	0.0354205	0.0174733	0.236331					0.201114	122.109027_C9H14
122	C9H14	Cyclohexylallene	NMOC_g		0.0186047													InChI=1S/C9H14/c1-2-6-9-7-4-3-5-8-9/h6,9H,1,3-5,7-8H2
122	C9H14	Santene	NMOC_g		0.414096													InChI=1S/C9H14/c1-6-7(2)9-4-3-8(6)5-9/h8-9H,3-5H2,1-2H3
122	C9H14	C9H14 isomers	NMOC_g		0.0406042		0.102208	0.0740596								0.0515701		939.706_1.192
122	C8H10O	C2 phenols + methyl anisol	NMOC_g		0.0342618							0.926156						122.07216_C8H10O
122	C8H10O	2,5-Dimethyl phenol	NMOC_g	0.376796	0.29244		0.20632	0.234848	0.103065	0.101583	0.284691					0.40003	0.127715	InChI=1S/C8H10O/c1-6-3-4-7(2)8(9)5-6/h3-5,9H,1-2H3
122	C8H10O	Phenol, 2,6-dimethyl-	NMOC_g													0.0246586		InChI=1S/C8H10O/c1-6-4-3-5-7(2)8(6)9/h3-5,9H,1-2H3
122	C8H10O	4-Methyl anisole	NMOC_g		0.0137768		0.0270035	0.0112944								0.0110315		InChI=1S/C8H10O/c1-7-3-5-8(9-2)6-4-7/h3-6H,1-2H3
122	C3H4Cl2	Trans-1,3-dichloropropene	NMOC_g													0.00179483		InChI=1S/C3H4Cl2/c4-2-1-3-5/h1-2H,3H2/b2-1+
123	C6H5NO2	Nitrobenzene	NMOC_g				0.0261654	0.0144166	0.00578731			0.0343827				0.0330726		InChI=1S/C6H5NO2/c8-7(9)6-4-2-1-3-5-6/h1-5H
123	C7H7O2	unknown	NMOC_g				0.0405925	0.00472863	0.00316515			0.0206296				0.0167456		123.04416_C7H8O2
123	C8H13N	unknown	NMOC_g				0.0132071	0.0088806	0.0017634			0.0728105				0.0142338		123.10416_C8H13N
123	C7H9NO	unknown	NMOC_g				0.0145278	0.00876527	0.00341123			0.139351				0.0246998		123.06815999999999_C7H9NO
124	C6H4O3	unknown	NMOC_g							0.171616	0.0777659						0.0700491	124.01552_C6H4O3
124	C6H4O3	Hydroxy benzoquinone	NMOC_g	0.363048	0.0921445		0.251158	0.0870227	0.212287			0.0936897				0.441594		InChI=1S/C6H4O3/c7-4-1-2-5(8)6(9)3-4/h1-3,9H
124	C6H5Cl	Chlorobenzene	NMOC_g	0.00127199			0.000932155									0.00301965		InChI=1S/C6H5Cl/c7-6-4-2-1-3-5-6/h1-5H
124	C7H8O2	2-Propionylfuran	NMOC_g													0.00600549		InChI=1S/C7H8O2/c1-2-6(8)7-4-3-5-9-7/h3-5H,2H2,1H3
124	C7H8O2	2-Acetyl-5-methylfuran	NMOC_g													0.00760695		InChI=1S/C7H8O2/c1-5-3-4-7(9-5)6(2)8/h3-4H,1-2H3
124	C7H8O2	Guaiacol (=2-methoxyphenol)	NMOC_g	1.03572	0.256394		1.12555	0.350068	0.566703	0.264328	0.41782	1.60336				1.7727	0.292473	InChI=1S/C7H8O2/c1-9-7-5-3-2-4-6(7)8/h2-5,8H,1H3
124	C8H12O	unknown	NMOC_g				0.114422	0.0733319	0.0367288			0.329017				0.335118		124.08816_C8H12O
124	C8H12O	Furan, 4-methyl-2-propyl-	NMOC_g		0.00308058													InChI=1S/C8H12O/c1-3-4-8-5-7(2)6-9-8/h5-6H,3-4H2,1-2H3
124	C8H12O	1-Acetylcyclohexene	NMOC_g		0.175288													InChI=1S/C8H12O/c1-7(9)8-5-3-2-4-6-8/h5H,2-4,6H2,1H3
124	C9H16	unknown	NMOC_g									0.153475						124.12416_C9H16
124	C9H16	Nonadiene	NMOC_g				0.00817614		0.00887473									InChI=1S/C9H16/c1-3-5-7-9-8-6-4-2/h3,5,7H,1,4,6,8-9H2,2H3
124	C9H16	1,8-Nonadiene	NMOC_g		0.0227963		0.028321									0.0245297		InChI=1S/C9H16/c1-3-5-7-9-8-6-4-2/h3-4H,1-2,5-9H2
124	C9H16	C9H16 isomers	NMOC_g		0.0132465		0.0839141	0.0889247								0.0560679		999.686_1.109
124	C7H12N2	unknown	NMOC_g				0.0140661	0.00617773	0.00222254			0.00120372				0.00872055		124.09916_C7H12N2
125	C8H15N	C8 nitriles	NMOC_g				0.00151279	0.004426				0.0143291				0.00164777		125.12016_C8H15N
125	C5H3NO3	unknown	NMOC_g				0.00653186	0.00147533	0.00378213			0.00358228				0.00823885		125.01116_C5H4NO3
125	C6H7NO2	unknown	NMOC_g				0.0211882	0.0211086	0.00279295			0.230858				0.0403703		125.04716_C6H7NO2
125	C6H7NS	unknown	NMOC_g				0.016205	0.00567436	0.00824167			0.0396041				0.0218329		125.02916_C6H8NS
125	C7H11NO	unknown	NMOC_g				0.00567624	0.00385856	0.00115679			0.0823924				0.00823885		125.08315999999999_C7H11NO
125	C8H13O	unknown	NMOC_g				0.00392334	0.0026102	0.000692113			0.00417932				0.00494331		125.09616_C8H14O
126	C7H10O2	Unsaturated c6 cyclic carboxylic acid	NMOC_g	0.0398051	0.0920643		0.162513	0.0385046	0.0736429	0.12036	0.0463547	0.418564				0.595878		126.155_C7H10O2
126	C6H6O3	Methyl 2-furoate	NMOC_g													0.00630418		InChI=1S/C6H6O3/c1-8-6(7)5-3-2-4-9-5/h2-4H,1H3
126	C6H6O3	5-(Hydroxymethyl)-2-furfural	NMOC_g	0.989637	0.330062		0.659153	0.303331	0.277224	0.129419	0.172377	0.758549				0.823611	0.665919	InChI=1S/C6H6O3/c7-3-5-1-2-6(4-8)9-5/h1-3,8H,4H2
126	C2H6S3	Dimethyl trisulfide	NMOC_g				0.0024549	0.000450346	0.000464227			0.000394872						InChI=1S/C2H6S3/c1-3-5-4-2/h1-2H3
126	C7H10S	Trimethylthiophene	NMOC_g		0.0243277													InChI=1S/C7H10S/c1-5-4-8-7(3)6(5)2/h4H,1-3H3
126	C9H18	unknown	NMOC_g				0.014879	0.0226299	0.00333973			0.0481744						126.14016_C9H18
126	C9H18	Cyclopentane, butyl-	NMOC_g		0.00515386		0.00749665	0.014723										InChI=1S/C9H18/c1-2-3-6-9-7-4-5-8-9/h9H,2-8H2,1H3
126	C9H18	2-Nonene, (e)-	NMOC_g		0.00515386		0.0085676	0.021047										InChI=1S/C9H18/c1-3-5-7-9-8-6-4-2/h3,5H,4,6-9H2,1-2H3/b5-3+
126	C9H18	Cis-2-nonene	NMOC_g				0.00615797	0.0113634										InChI=1S/C9H18/c1-3-5-7-9-8-6-4-2/h3,5H,4,6-9H2,1-2H3/b5-3-
126	C9H18	1-Nonene	NMOC_g	0.0658843	0.0694255		0.0307776	0.141499	0.0238572							0.045156		InChI=1S/C9H18/c1-3-5-7-9-8-6-4-2/h3H,1,4-9H2,2H3
126	C9H18	4-Nonene, e	NMOC_g				0.00508701	0.00948596										InChI=1S/C9H18/c1-3-5-7-9-8-6-4-2/h7,9H,3-6,8H2,1-2H3/b9-7+
126	C9H18	Cis-4-nonene	NMOC_g		0.00303168		0.00669344	0.0145254										InChI=1S/C9H18/c1-3-5-7-9-8-6-4-2/h7,9H,3-6,8H2,1-2H3/b9-7-
126	C9H18	Cyclohexane, 1,1,3-trimethyl-	NMOC_g					0.0127468										InChI=1S/C9H18/c1-8-5-4-6-9(2,3)7-8/h8H,4-7H2,1-3H3
126	C9H18	C9H18 isomers	NMOC_g		0.0100045		0.00374833	0.0565205								0.00560828		974.694_1.043
126	C8H14O	unknown	NMOC_g				0.0960071	0.0452597	0.0169156			0.11629				0.109933		126.10416_C8H14O
126	C8H14O	Octenone	NMOC_g		0.00597134													InChI=1S/C8H14O/c1-3-4-5-6-7-8(2)9/h6-7H,3-5H2,1-2H3
127	C10H7	unknown	NMOC_g				0.00748822	0.0035744	0.00450022			0.0207634				0.00729819		127.05416000000001_C10H8
127	C6H9NO2	unknown	NMOC_g				0.0104756	0.00893599	0.00159111			0.0797237				0.01784		127.06316_C6H9NO2
127	C7H13NO	unknown	NMOC_g				0.0024012	0.001117	0.000454143			0.023114				0.0036491		127.09916_C7H13NO
127	C8H17N	unknown	NMOC_g				0.00120219	0.0010053	0.000457357			0.00881466				0.00202728		127.13516_C8H17N
128	C7H12O2	unknown	NMOC_g				0.0327143	0.0197273	0.0040697			0.0520861				0.0631591		128.08316000000002_C7H12O2
128	C7H12O2	Cyclohexanoic acid	NMOC_g		0.0108853													InChI=1S/C7H12O2/c8-7(9)6-4-2-1-3-5-6/h6H,1-5H2,(H,8,9)
128	C10H8	4-Phenylbut-3-ene-1-yne	NMOC_g		0.0101467		0.0139684									0.00504211		InChI=1S/C10H8/c1-2-3-7-10-8-5-4-6-9-10/h1,3-9H/b7-3+
128	C10H8	Naphthalene	NMOC_g	0.515056	0.310692		0.452807	0.107591	0.381334	1.77655	0.266917	0.13177				0.154188	0.820018	InChI=1S/C10H8/c1-2-6-10-8-4-3-7-9(10)5-1/h1-8H
128	C6H8O3	2,5-Di(hydroxymethyl)furan + methyl hydroxy dihydrofurfural	NMOC_g		0.00957902		0.523385	0.0680479	0.121384			0.66021				0.763944		128.04716000000002_C6H8O3
128	C8H16O	unknown	NMOC_g				0.0434062	0.0189515	0.00601503			0.0785178				0.0752277		128.11916000000002_C8H16O
128	C8H16O	Octanal	NMOC_g		0.00775921													InChI=1S/C8H16O/c1-2-3-4-5-6-7-8-9/h8H,2-7H2,1H3
128	C8H16O	Octanone	NMOC_g		0.00609574													InChI=1S/C8H16O/c1-3-4-5-6-7-8(2)9/h3-7H2,1-2H3
128	C9H20	unknown	NMOC_g				0.00889225	0.00387895	0.00466325			0.010495						128.15616_C9H20
128	C9H20	Nonane	NMOC_g	0.0216183	0.0229792		0.0367875	0.118327	0.0344876		0.093434	0.061765				0.0169652	0.304392	InChI=1S/C9H20/c1-3-5-7-9-8-6-4-2/h3-9H2,1-2H3
128	C9H20	Octane, 2-methyl-	NMOC_g					0.00573882										InChI=1S/C9H20/c1-4-5-6-7-8-9(2)3/h9H,4-8H2,1-3H3
128	C9H20	Octane, 3-methyl-	NMOC_g					0.00554428										InChI=1S/C9H20/c1-4-6-7-8-9(3)5-2/h9H,4-8H2,1-3H3
128	C9H20	Heptane, 2,3-dimethyl-	NMOC_g					0.00612789										InChI=1S/C9H20/c1-5-6-7-9(4)8(2)3/h8-9H,5-7H2,1-4H3
128	C9H20	Heptane, 2,6-dimethyl-	NMOC_g				0.00421687	0.0131312										InChI=1S/C9H20/c1-8(2)6-5-7-9(3)4/h8-9H,5-7H2,1-4H3
129	C9H7N	unknown	NMOC_g				0.0132913	0.010447	0.00528351			0.0588175				0.00758421		129.05716_C9H8N
129	C7H15NO	unknown	NMOC_g				0.00194996	0.00230933	0.000447102			0.0140776				0.00199584		129.11516_C7H15NO
129	C4H3NO4	unknown	NMOC_g				0.00120445	0.000329904	0.000450266			0.0017356				0.00159668		129.00516000000002_C4H3NO4
129	C5H7NO3	unknown	NMOC_g				0.00820284	0.00417879	0.0032668			0.0291195				0.0139709		129.04216000000002_C5H7NO3
130	CHCl3	Trichloromethane	NMOC_g	0.0319285		0.00116675	0.000542902								0.000477007	0.00311922		InChI=1S/CHCl3/c2-1(3)4/h1H
130	C10H10	Dihydronaphthalene	NMOC_g	0.110153					0.0406383	0.166831		0.0989336						130.07816_C10H10
130	C10H10	C10H10 isomers	NMOC_g		0.108615		0.0584587	0.055388								0.056492		1634.48_2.103
130	C5H6O4	unknown	NMOC_g				0.0410048	0.0270623	0.0105762			0.0329141				0.0621874		130.02616_C5H6O4
130	C6H10O3	unknown	NMOC_g				0.0523846	0.00851153	0.014113			0.0740567				0.114869		130.06216_C6H10O3
130	C7H14O2	unknown	NMOC_g				0.0266093	0.0220427	0.00379782			0.0583651				0.0198049		130.09916_C7H14O2
130	C7H14O2	Amyl acetate	NMOC_g		0.00664503													InChI=1S/C7H14O2/c1-3-4-5-6-9-7(2)8/h3-6H2,1-2H3
130	C8H18O	unknown	NMOC_g				0.00410382	0.00109122	0.000903027			0.00497538				0.00911026		130.13516_C8H18O
130	CF2Cl2	Dichlorodifluoromethane	NMOC_g			0.00544483												InChI=1S/CCl2F2/c2-1(3,4)5
130	C9H6O	unknown	NMOC_g				0.0472188	0.00643821	0.0320359			0.0382722				0.0316879		130.04116000000002_C9H6O
131	C3HNO5	unknown	NMOC_g				0.000477501	0.000216578				0.000949501				0.000393075		130.98516_C3HO5N
131	C9H9N	Methyl benzeneacetonitrile	NMOC_g				0.0160968	0.0105041	0.00364162			0.0765298				0.0149368		InChI=1S/C9H9N/c1-8(7-10)9-5-3-2-4-6-9/h2-6,8H,1H3
131	C8H5NO	unknown	NMOC_g				0.00284499	0.000758025	0.00110848			0.0041778				0.0031446		131.03616000000002_C8H5ON
131	C5H9NO3	unknown	NMOC_g				0.00685006	0.0040067	0.00176889			0.0229779				0.0110061		131.05816000000002_C5H9NO3
132	C6H12O3	C6- hydroxy-carboxylic acids	NMOC_g		0.00358883													132.159_C6H12O3
132	C4H4O5	unknown	NMOC_g				0.0024959	0.000429875	0.000440033			0.00150769				0.00195048		132.00516000000002_C4H4O5
132	C10H12	Methyl propenyl benzene + ethyl styrene	NMOC_g		0.017522		0.0439982		0.0175497			0.1274						132.09316_C10H12
132	C10H12	Benzene, (1-methyl-1-propenyl)-, (e)-	NMOC_g				0.0239487		0.102239									InChI=1S/C10H12/c1-3-9(2)10-7-5-4-6-8-10/h3-8H,1-2H3/b9-3+
132	C10H12	O-isopropenyltoluene	NMOC_g		0.00636653		0.00996714											InChI=1S/C10H12/c1-8(2)10-7-5-4-6-9(10)3/h4-7H,1H2,2-3H3
132	C10H12	C10H12 isomers	NMOC_g		0.154244		0.190654	0.0800461								0.0354533		1519.52_1.769
132	C5H8O4	unknown	NMOC_g				0.0406355	0.00806017	0.0156546			0.0704846				0.100255		132.04216000000002_C5H8O4
132	C9H8O	Methylbenzofurans	NMOC_g	0.0204391	0.0380472		0.154687	0.0783724	0.132251			0.186388				0.101393		132.05716_C9H8O
133	C4H7NO4	Butadiene hydroxynitrates	NMOC_g				0.0307164											133.08150999999998_C4H7NO4
133	C5H11NO3	2-Pentyl nitrate	NMOC_g		0.00124183		0.00159734					0.00044374						InChI=1S/C5H11NO3/c1-3-4-5(2)9-6(7)8/h5H,3-4H2,1-2H3
133	C5H11NO3	3-Pentyl nitrate	NMOC_g		0.00113707		0.00148763	0.00168501				0.00044374						InChI=1S/C5H11NO3/c1-3-5(4-2)9-6(7)8/h5H,3-4H2,1-2H3
133	C5H11NO3	3-Methylbutan-2-yl nitrate	NMOC_g		0.0014902		0.00253646	0.0213434										InChI=1S/C5H11NO3/c1-4(2)5(3)9-6(7)8/h4-5H,1-3H3
133	C5H11NO3	3-Methyl-2-butyl nitrate	NMOC_g				0.000877612											InChI=1S/C5H11NO3/c1-5(2)3-4-9-6(7)8/h5H,3-4H2,1-2H3
133	C7H19NO	unknown	NMOC_g				0.00138033	0.000959948	0.000436725			0.00523725				0.00193582		133.14616_C7H19NO
133	C8H7NO	unknown	NMOC_g				0.010233	0.0101328	0.00216981			0.0632211				0.0112278		133.05216000000001_C8H7NO
133	C9H11N	unknown	NMOC_g				0.00301954	0.00127993	0.000761966			0.0269344				0.00387164		133.08816000000002_C9H11N
134	C10H14	Methyl-n-Propylbenzene isomers	NMOC_g		0.0499097		0.0662354		0.0548185			0.150747						134.109550447_C10H14
134	C10H14	1-Butenylbenzene	NMOC_g				0.00638779		0.00784366									InChI=1S/C10H12/c1-2-3-7-10-8-5-4-6-9-10/h3-9H,2H2,1H3
134	C10H14	N-butylbenzene	NMOC_g		0.0188145		0.0247904	0.0185491	0.0207073							0.00302585		InChI=1S/C10H14/c1-2-3-7-10-8-5-4-6-9-10/h4-6,8-9H,2-3,7H2,1H3
134	C10H14	1,2,3,4,5,8-Hexahydronaphthalene	NMOC_g				0.00903728		0.00752992									InChI=1S/C10H14/c1-2-6-10-8-4-3-7-9(10)5-1/h1-2H,3-8H2
134	C10H14	Benzene, 1-methyl-4-propyl-	NMOC_g		0.00684164		0.00780435	0.00683387								0.00176508		InChI=1S/C10H14/c1-3-4-10-7-5-9(2)6-8-10/h5-8H,3-4H2,1-2H3
134	C10H14	Benzene, 1-methyl-3-propyl-	NMOC_g		0.00855206		0.0108254	0.010023								0.00252154		InChI=1S/C10H14/c1-3-5-10-7-4-6-9(2)8-10/h4,6-8H,3,5H2,1-2H3
134	C10H14	Benzene, 1-methyl-2-propyl-	NMOC_g		0.00855206		0.0115807	0.0134725								0.00176508		InChI=1S/C10H14/c1-3-6-10-8-5-4-7-9(10)2/h4-5,7-8H,3,6H2,1-2H3
134	C10H14	1,4-Diethylbenzene	NMOC_g		0.00513123		0.00725236		0.0047062							0.00151292		InChI=1S/C10H14/c1-3-9-5-7-10(4-2)8-6-9/h5-8H,3-4H2,1-2H3
134	C10H14	1,3-Dimethyl-4-ethylbenzene	NMOC_g		0.00969233		0.0120842	0.0101532								0.003278		InChI=1S/C10H14/c1-4-10-6-5-8(2)7-9(10)3/h5-7H,4H2,1-3H3
134	C10H14	Benzene, 4-ethyl-1,2-dimethyl-	NMOC_g		0.00684164		0.00981838	0.00852606								0.00277369		InChI=1S/C10H14/c1-4-10-6-5-8(2)9(3)7-10/h5-7H,4H2,1-3H3
134	C10H14	Benzene, 5-ethyl-1,3-dimethyl-	NMOC_g		0.00912219		0.00931487	0.00631319								0.00277369		InChI=1S/C10H14/c1-4-10-6-8(2)5-9(3)7-10/h5-7H,4H2,1-3H3
134	C10H14	1,2-Dimethyl-3-ethylbenzene	NMOC_g		0.00627151		0.00730085									0.00151292		InChI=1S/C10H14/c1-4-10-7-5-6-8(2)9(10)3/h5-7H,4H2,1-3H3
134	C10H14	Benzene, 2-ethyl-1,4-dimethyl-	NMOC_g		0.00627151		0.00780435	0.00663861								0.00201723		InChI=1S/C10H14/c1-4-10-7-8(2)5-6-9(10)3/h5-7H,4H2,1-3H3
134	C10H14	Benzene, 2-ethyl-1,3-dimethyl-	NMOC_g				0.00604208	0.00423049										InChI=1S/C10H14/c1-4-10-8(2)6-5-7-9(10)3/h5-7H,4H2,1-3H3
134	C10H14	Benzene, 1,2,3,4-tetramethyl-	NMOC_g					0.0231701										InChI=1S/C10H14/c1-7-5-6-8(2)10(4)9(7)3/h5-6H,1-4H3
134	C10H14	1,2,3,5-Tetramethylbenzene	NMOC_g		0.0202399		0.0191332	0.0144487								0.00428661		InChI=1S/C10H14/c1-7-5-8(2)10(4)9(3)6-7/h5-6H,1-4H3
134	C10H14	M-cymene	NMOC_g		0.0219503		0.0307139	0.00397015								0.00151292		InChI=1S/C10H14/c1-8(2)10-6-4-5-9(3)7-10/h4-8H,1-3H3
134	C10H14	P-cymene	NMOC_g	0.0054207	0.29835		0.179744	0.0695271	0.24648	0.0109523						0.0429566	0.187244	InChI=1S/C10H14/c1-8(2)10-6-4-9(3)5-7-10/h4-8H,1-3H3
134	C10H14	O-cymene	NMOC_g		0.00399096													InChI=1S/C10H14/c1-8(2)10-7-5-4-6-9(10)3/h4-8H,1-3H3
134	C10H14	Isobutylbenzene	NMOC_g		0.00655658		0.0165502	0.00423049	0.0160011									InChI=1S/C10H14/c1-9(2)8-10-6-4-3-5-7-10/h3-7,9H,8H2,1-2H3
134	C10H14	C10H14 isomers	NMOC_g		0.0293621		0.0460709											1169.63_1.267
134	C4H6O5	unknown	NMOC_g				0.00617625	0.003917	0.00195059			0.00872549				0.0122968		134.02116_C4H6O5
134	C8H6O2	unknown	NMOC_g	0.00980889			0.0668936	0.0271526	0.0338611	0.0273808	0.00807449	0.0850271				0.0900983	0.0334132	134.03616000000002_C8H6O2
134	C8H6O2	Phthalic acid	NMOC_g		0.0321171													InChI=1S/C8H6O4/c9-7(10)5-3-1-2-4-6(5)8(11)12/h1-4H,(H,9,10)(H,11,12)
134	C9H10O	unknown	NMOC_g	0.0575627						0.0425924	0.020452						0.0247257	134.072641_C9H10O
134	C9H10O	Benzene, 1-ethenyl-4-methoxy-	NMOC_g													0.00313196		InChI=1S/C9H10O/c1-3-8-4-6-9(10-2)7-5-8/h3-7H,1H2,2H3
134	C9H10O	4-Methylacetophenone	NMOC_g		0.0746058													InChI=1S/C9H10O/c1-7-3-5-9(6-4-7)8(2)10/h3-6H,1-2H3
134	C9H10O	3-Methylacetophenone	NMOC_g				0.113397	0.0507547	0.0368136			0.15873				0.0864104		InChI=1S/C9H10O/c1-7-4-3-5-9(6-7)8(2)10/h3-6H,1-2H3
135	C4H9NO4	Butene hydroxynitrates	NMOC_g	0.0076865			0.0222439	0.00399307	0.00246716			0.0711296				0.0211214		135.09716999999998_C4H9NO4
135	C9H13N	unknown	NMOC_g				0.00626229	0.00294226	0.000855973			0.0447785				0.00457714		135.10416_C9H13N
135	C8H9NO	unknown	NMOC_g				0.00965976	0.00683024	0.0021422			0.0593361				0.00724713		135.06816_C8H9NO
135	C7H5NO2	unknown	NMOC_g				0.00800029	0.00294226	0.00139606			0.0313265				0.0209785		135.03116_C7H5O2N
136	C10H16	Monoterpenes	NMOC_g		0.637034					0.316544								136.124677_C10H16
136	C10H16	1,3-Cyclohexadiene, 5-butyl-	NMOC_g		0.00365139													InChI=1S/C10H16/c1-2-3-7-10-8-5-4-6-9-10/h4-6,8,10H,2-3,7,9H2,1H3
136	C10H16	(e)-ocimene	NMOC_g		0.0123586		0.0103306											InChI=1S/C10H16/c1-5-10(4)8-6-7-9(2)3/h5,7-8H,1,6H2,2-4H3/b10-8+
136	C10H16	Z-ocimene	NMOC_g				0.0732704											InChI=1S/C10H16/c1-5-10(4)8-6-7-9(2)3/h5,7-8H,1,6H2,2-4H3/b10-8-
136	C10H16	Myrcene	NMOC_g	0.0192021	0.3525		0.0988971	0.00684587	0.0284426							0.0159061		InChI=1S/C10H16/c1-5-10(4)8-6-7-9(2)3/h5,7H,1,4,6,8H2,2-3H3
136	C10H16	Allo-ocimene or a-pyronene	NMOC_g		0.018257		0.016835											InChI=1S/C10H16/c1-5-10(4)8-6-7-9(2)3/h5-8H,1-4H3/b8-6+,10-5+
136	C10H16	A-thujene	NMOC_g				0.0170263											InChI=1S/C10H16/c1-7(2)10-5-4-8(3)9(10)6-10/h4,7,9H,5-6H2,1-3H3
136	C10H16	Sabinene	NMOC_g		0.0626354		0.00994794											InChI=1S/C10H16/c1-7(2)10-5-4-8(3)9(10)6-10/h7,9H,3-6H2,1-2H3
136	C10H16	Alpha-pinene	NMOC_g	0.0576064	1.07224		0.220214	0.0761528	0.0454524		0.0348943	0.365197				0.0249862	0.182178	InChI=1S/C10H16/c1-7-4-5-8-6-9(7)10(8,2)3/h4,8-9H,5-6H2,1-3H3
136	C10H16	Beta-pinene	NMOC_g	0.0329179	0.862907		0.145664	0.138003	0.037087		0.0604519	0.449618				0.0607378	0.14086	InChI=1S/C10H16/c1-7-4-5-8-6-9(7)10(8,2)3/h8-9H,1,4-6H2,2-3H3
136	C10H16	3-Carene	NMOC_g		0.389295		0.143948		0.0527025									InChI=1S/C10H16/c1-7-4-5-8-9(6-7)10(8,2)3/h4,8-9H,5-6H2,1-3H3
136	C10H16	4-Carene	NMOC_g				0.0148932											InChI=1S/C10H16/c1-7-4-5-8-9(6-7)10(8,2)3/h4-5,7-9H,6H2,1-3H3
136	C10H16	À-fenchene	NMOC_g		0.0140438		0.016835											InChI=1S/C10H16/c1-7-6-8-4-5-9(7)10(8,2)3/h8-9H,1,4-6H2,2-3H3
136	C10H16	Camphene	NMOC_g	0.0301748	1.2426		0.0610266		0.0264907							0.0198826		InChI=1S/C10H16/c1-7-8-4-5-9(6-8)10(7,2)3/h8-9H,1,4-6H2,2-3H3
136	C10H16	Limonene	NMOC_g														0.159588	InChI=1S/C10H16/c1-8(2)10-6-4-9(3)5-7-10/h4,10H,1,5-7H2,2-3H3
136	C10H16	D-limonene	NMOC_g		0.633095		0.796075		0.0694335							0.040533		InChI=1S/C10H16/c1-8(2)10-6-4-9(3)5-7-10/h4,10H,1,5-7H2,2-3H3/t10-/m0/s1
136	C10H16	B-phellandrene	NMOC_g		0.13145		0.0468701									0.00383437		InChI=1S/C10H16/c1-8(2)10-6-4-9(3)5-7-10/h4,6,8,10H,3,5,7H2,1-2H3
136	C10H16	Alpha terpinene	NMOC_g		0.0460637		0.0208524											InChI=1S/C10H16/c1-8(2)10-6-4-9(3)5-7-10/h4,6,8H,5,7H2,1-3H3
136	C10H16	Isolimonene	NMOC_g				0.00950107		0.000836548									InChI=1S/C10H16/c1-8(2)10-6-4-9(3)5-7-10/h4,6,9-10H,1,5,7H2,2-3H3
136	C10H16	Gamma-terpinene	NMOC_g		0.0168526		0.0138896		0.014779									InChI=1S/C10H16/c1-8(2)10-6-4-9(3)5-7-10/h4,7-8H,5-6H2,1-3H3
136	C10H16	À-phellandrene	NMOC_g		0.0353904		0.0315656											InChI=1S/C10H16/c1-8(2)10-6-4-9(3)5-7-10/h4-6,8,10H,7H2,1-3H3
136	C10H16	Terpinolene	NMOC_g		0.107576		0.0322503		0.0189618									InChI=1S/C10H16/c1-8(2)10-6-4-9(3)5-7-10/h4H,5-7H2,1-3H3
136	C10H16	B-pyronene	NMOC_g		0.0514004													InChI=1S/C10H16/c1-8-6-5-7-10(3,4)9(8)2/h5-6H,7H2,1-4H3
136	C10H16	Pyronene?	NMOC_g				0.00516528											InChI=1S/C10H16/c1-8-6-5-7-10(3,4)9(8)2/h5-7,9H,1-4H3
136	C10H16	Gamma pyronene	NMOC_g		0.047749		0.016835									0.00213021		InChI=1S/C10H16/c1-8-6-5-7-10(3,4)9(8)2/h6H,2,5,7H2,1,3-4H3
136	C10H16	Tricyclene	NMOC_g	0.0137158	0.564		0.0173									0.0258474		InChI=1S/C10H16/c1-9(2)6-4-7-8(5-6)10(7,9)3/h6-8H,4-5H2,1-3H3
136	C10H16	Bornylene	NMOC_g		0.0244362													InChI=1S/C10H16/c1-9(2)8-4-6-10(9,3)7-5-8/h4,6,8H,5,7H2,1-3H3
136	C10H16	C10H16 isomers	NMOC_g		0.153078		0.119567									0.00894687		1069.66_1.091
136	C9H12O	unknown	NMOC_g	0.017549			0.0784392		0.0339026			0.303096						136.08816000000002_C9H12O
136	C9H12O	4-Ethyl anisole	NMOC_g													0.109201		InChI=1S/C9H12O/c1-3-8-4-6-9(10-2)7-5-8/h4-7H,3H2,1-2H3
136	C9H12O	2,3-Dimethylanisole	NMOC_g					0.0401214										InChI=1S/C9H12O/c1-7-5-4-6-9(10-3)8(7)2/h4-6H,1-3H3
136	C8H8O2	unknown	NMOC_g	0.10097						0.11151	0.034482						0.0289712	136.051906_C8H8O2
136	C8H8O2	Benzoic acid, methyl ester	NMOC_g				0.0317109	0.00394442										InChI=1S/C8H8O2/c1-10-8(9)7-5-3-2-4-6-7/h2-6H,1H3
136	C8H8O2	Methyl benzoic acid	NMOC_g		0.130109		0.16151	0.0822188	0.0724161			0.264134				0.286456		InChI=1S/C8H8O2/c1-6-4-2-3-5-7(6)8(9)10/h2-5H,1H3,(H,9,10)
136	C8H8O2	Acetic acid, phenyl ester	NMOC_g													0.00249653		InChI=1S/C8H8O2/c1-7(9)10-8-5-3-2-4-6-8/h2-6H,1H3
136	C7H4O3	unknown	NMOC_g				0.00974675	0.00187754	0.00351224			0.0098776				0.0106015		136.01516_C7H4O3
136	C7H4OS	unknown	NMOC_g				0.00405361	0.001356	0.000854182			0.00420713				0.0064366		135.99816_C7H4OS
137	C4H11NO4	unknown	NMOC_g				0.0171849	0.00279576	0.00200717			0.0243322				0.0131551		137.06816_C4H11NO4
137	C8H11NO	unknown	NMOC_g				0.00561874	0.00300285	0.0015832			0.0711807				0.0112758		137.08316000000002_C8H11NO
137	C7H7NO2	Nitrotoluene	NMOC_g				0.0197375	0.0130469	0.00349108			0.0867969				0.0409687		InChI=1S/C7H7NO2/c1-6-4-2-3-5-7(6)8(9)10/h2-5H,1H3
137	C6H3NO3	unknown	NMOC_g				0.00185618	0.00093192	0.00126298			0.00417642				0.00413446		137.01116000000002_C6H3O3N
138	C9H14O	unknown	NMOC_g				0.0515963	0.0478003	0.014007			0.149802				0.0996273		138.10416_C9H14O
138	C9H14O	Isophorone	NMOC_g		0.0185775													InChI=1S/C9H14O/c1-7-4-8(10)6-9(2,3)5-7/h4H,5-6H2,1-3H3
138	C8H10O2	2-Methoxy-4-methylphenol (= creosol)	NMOC_g	0.340504	0.132496		0.641967	0.203774	0.139297	0.197336	0.0956642	0.910171				0.62358	0.0240091	InChI=1S/C8H10O2/c1-6-3-4-7(9)8(5-6)10-2/h3-5,9H,1-2H3
138	C7H6OS	unknown	NMOC_g				0.0111273	0.00318669	0.00262398			0.00919365				0.013806		138.01316_C7H6OS
138	C7H6O3	unknown	NMOC_g	0.084468			0.111768	0.105151	0.0336656	0.0868514	0.0287151	0.0940997				0.202262	0.0863028	138.03116_C7H6O3
138	C7H6O3	Hydroxybenzoic acid	NMOC_g		0.0669316													InChI=1S/C7H6O3/c8-6-3-1-5(2-4-6)7(9)10/h1-4,8H,(H,9,10)
138	C10H18	unknown	NMOC_g						0.0053554			0.0802191						138.14016_C10H18
138	C10H18	1,9-Decadiene	NMOC_g		0.0132867		0.0190859	0.00694584								0.0143033		InChI=1S/C10H18/c1-3-5-7-9-10-8-6-4-2/h3-4H,1-2,5-10H2
138	C10H18	C10H18 isomers	NMOC_g		0.0772288		0.0966915	0.0407769								0.0232429		1199.62_1.109
139	C9H17N	unknown	NMOC_g				0.00171876	0.00326582	0.000417873			0.0173602				0.00333407		139.13516_C9H17N
139	C10H5N	unknown	NMOC_g				0.0102904	0.00418433	0.0113099			0.0402684				0.0240794		139.04116000000002_C10H5N
139	C6H5NO3	Nitrophenol	NMOC_g	0.0149306			0.0104966									0.0291725		InChI=1S/C6H5NO3/c8-6-4-2-1-3-5(6)7(9)10/h1-4,8H
139	C7H9NO2	unknown	NMOC_g				0.0113132	0.00867483	0.00114695			0.120089				0.0255612		139.06316_C7H9NO2
139	C8H13NO	unknown	NMOC_g				0.00250849	0.00398021	0.000417873			0.036689				0.00296361		139.09916_C8H13NO
140	C8H12O2	unknown	NMOC_g		0.056297		0.0596308	0.018543	0.0203478			0.128649				0.163331		140.08316000000002_C8H12O2
140	C9H16O	unknown	NMOC_g				0.0271443	0.0246227	0.00722118			0.0511754				0.0286888		140.11916000000002_C9H16O
140	C7H8O3	unknown	NMOC_g									0.330508						140.04716000000002_C7H8O3
140	C7H8O3	3-Methoxycatechol	NMOC_g	0.121309	0.0636027		0.125048	0.0817826	0.0552229	0.121719	0.0785699					0.215648	0.0793133	InChI=1S/C7H8O3/c1-10-6-4-2-3-5(8)7(6)9/h2-4,8-9H,1H3
140	C6H4O4	unknown	NMOC_g				0.00923214	0.000810622	0.00246309			0.00550846				0.00845953		140.01016_C6H4O4
140	C5H2NS2	unknown	NMOC_g				0.00148869	0.000405311	0.000516423			0.00159923				0.00183903		139.96216_C5H3NS2
140	C10H20	unknown	NMOC_g				0.0103214	0.0201642	0.0026924			0.0328731						140.15616_C10H20
140	C10H20	1-Decene	NMOC_g	0.0469426	0.0622101		0.0388755	0.0791929	0.0292793							0.0402996		InChI=1S/C10H20/c1-3-5-7-9-10-8-6-4-2/h3H,1,4-10H2,2H3
140	C10H20	C10H20 isomers	NMOC_g		0.00654843		0.0253012	0.109563								0.00142377		1144.64_1.03
141	CH3I	unknown	NMOC_g				0.000573677	0.000201218								0.000365197		141.92716000000001_CH3I
141	CH3I	Methyl iodide	NMOC_g	0.00163543	0.000530724	0.00448219	0.00241433	0.0125828	0.00135369		0.000567279	0.000929308			0.00249216	0.00275223	0.001145	InChI=1S/CH3I/c1-2/h1H3
141	C6H7NO3	unknown	NMOC_g				0.00539878	0.00261584	0.00164344			0.0209954				0.00766914		141.04216000000002_C6H7NO3
141	C7H11NO2	unknown	NMOC_g				0.00353175	0.00281706	0.000617919			0.0269941				0.00547796		141.07816000000003_C7H11NO2
141	C8H15NO	unknown	NMOC_g				0.00116841	0.000603655				0.0112917				0.00182599		141.11516_C8H15NO
142	C6H6O4	unknown	NMOC_g				0.104146	0.0123877	0.0253506			0.0742804				0.111689		142.02616_C6H6O4
142	C9H18O	unknown	NMOC_g					0.0139861	0.00153607			0.0283807				0.0250211		142.13516_C9H18O
142	C9H18O	Nonanal	NMOC_g		0.0104913		0.0107707											InChI=1S/C9H18O/c1-2-3-4-5-6-7-8-9-10/h9H,2-8H2,1H3
142	C8H14O2	unknown	NMOC_g				0.027649	0.014086	0.00671043			0.0373154				0.0286474		142.09916_C8H14O2
142	C7H10O3	unknown	NMOC_g				0.110744	0.0216784	0.0220065			0.201468				0.27487		142.06216_C7H10O3
142	C11H10	Methyl naphthalenes	NMOC_g						0.0875338			0.0912738						142.07816000000003_C11H10
142	C11H10	Naphthalene, 1-methyl-	NMOC_g		0.0355091		0.0597413	0.0328306								0.0391251		InChI=1S/C11H10/c1-9-5-4-7-10-6-2-3-8-11(9)10/h2-8H,1H3
142	C11H10	Naphthalene, 2-methyl-	NMOC_g		0.0368541		0.0347246	0.0343939								0.0490842		InChI=1S/C11H10/c1-9-6-7-10-4-2-3-5-11(10)8-9/h2-8H,1H3
142	C10H22	unknown	NMOC_g				0.00673615	0.00479523	0.00193649			0.0122633				0.00870301		142.17116000000001_C10H22
142	C10H22	N-decane	NMOC_g	0.0316662	0.0243453		0.0428577	0.0921499	0.0352324		0.139294	0.0625458				0.0770513	0.477514	InChI=1S/C10H22/c1-3-5-7-9-10-8-6-4-2/h3-10H2,1-2H3
142	C10H22	Nonane, 2-methyl-	NMOC_g				0.00261327	0.0106091										InChI=1S/C10H22/c1-4-5-6-7-8-9-10(2)3/h10H,4-9H2,1-3H3
142	C10H22	C10H22 isomers	NMOC_g		0.00511116		0.0178177	0.0330547								0.00349615		1209.62_0.994
143	C9H5NO	unknown	NMOC_g				0.00301786	0.00327367	0.00101546			0.0100899				0.00648161		143.03616000000002_C9H5ON
143	C9H21N	unknown	NMOC_g				0.000752296	0.000694414	0.000406184			0.00452308				0.00108027		143.16716000000002_C9H21N
143	C8H17NO	unknown	NMOC_g				0.00115038	0.00208324				0.00904615				0.00144036		143.13016000000002_C8H17NO
143	C10H9N	unknown	NMOC_g				0.00583961	0.00426569	0.00171558			0.0361846				0.00396098		143.07316_C10H9N
143	C6H9NO3	unknown	NMOC_g				0.00913903	0.00724175	0.00232914			0.0934189				0.0183646		143.05816000000002_C6H9NO3
144	C9H20O	unknown	NMOC_g				0.011007	0.00857064	0.0016092			0.0160663				0.0168067		144.15116_C9H20O
144	C6H8O4	Product of levoglucosan dehydration (pyrolysis)	NMOC_g				0.286457	0.343318	0.0664669			0.3792				0.453065		144.04216000000002_C6H8O4
144	C8H16O2	unknown	NMOC_g				0.0560101	0.041277	0.00750566			0.0922519				0.0536383		144.11416000000003_C8H16O2
144	C2H3Cl3	1,1,1-Trichloroethane	NMOC_g				0.000405286											InChI=1S/C2H3Cl3/c1-2(3,4)5/h1H3
144	C11H12	Ethylindene	NMOC_g				0.0400361	0.0618662	0.0123077			0.0685843				0.0107277		InChI=1S/C11H12/c1-2-9-7-8-10-5-3-4-6-11(9)10/h3-9H,2H2,1H3
144	C11H12	C11H12 isomers	NMOC_g		0.0188343		0.0281124	0.0233443								0.0182723		1869.41_1.993
144	C10H8O	unknown	NMOC_g	0.523403	0.226453					0.0917258	0.0281397						0.0522359	144.056991_C10H8O
144	C10H8O	2-Ethenyl benzofuran	NMOC_g				0.17635	0.147146	0.0634729			0.0578734				0.0712151		InChI=1S/C10H8O/c1-2-9-7-8-5-3-4-6-10(8)11-9/h2-7H,1H2
145	C10H11N	unknown	NMOC_g				0.00771976	0.00518519	0.00169191			0.0610771				0.00710245		145.08816000000002_C10H11N
145	C11H13	Unknown	NMOC_g		0.14896		0.190216	0.164058	0.0822888							0.0934319	0.240851	144.093377_C11H13
146	C9H6O2	unknown	NMOC_g				0.0414836	0.016615	0.018758			0.0388489				0.0458497		146.03616000000002_C9H6O2
146	C10H10O	Dimethylbenzofurans	NMOC_g	0.0769966					0.050439	0.0508191	0.0221364	0.178909						146.07216000000003_C10H10O
146	C10H10O	Ethyl-benzofuran isomers	NMOC_g													0.0350247		1924.39_2.504
146	C10H10O	Benzofuran, -dimethyl- (isomer)s	NMOC_g				0.0266719	0.0239492								0.018043		1944.38_2.336
146	C10H10O	Benzofuran, dimethyl- (isomer)s	NMOC_g		0.0409889		0.0413415	0.0289912								0.0318406		1974.37_2.385
146	C11H14	Unknown	NMOC_g						0.00542204			0.0662817				0.0109334		146.109027_C11H14
146	C11H14	C11H14 isomers	NMOC_g		0.00886992		0.0193214	0.0378368										1769.44_1.729
146	C5H6O5	unknown	NMOC_g				0.0052915	0.0032064	0.00149399			0.00460053				0.00916995		146.02116_C5H6O5
146	C6H10O4	unknown	NMOC_g				0.0292793	0.0136029	0.0151463			0.053332				0.0701854		146.05716_C6H10O4
147	C5H9NO4	Isoprene hydroxynitrates	NMOC_g				0.0337463											147.10816999999997_C5O4H9N
147	C8H21NO	unknown	NMOC_g				0.00107942	0.000965027	0.000392355			0.00541538				0.00175146		147.16216_C8H21NO
147	C8H5NO2	unknown	NMOC_g				0.00495433	0.00675519	0.0012821			0.0213231				0.00735611		147.03116_C8H5NO2
147	C9H9NO	unknown	NMOC_g				0.00802816	0.00569366	0.00186646			0.0594				0.00945786		147.06816_C9H9NO
147	CFCl3	Trichlorofluoromethane	NMOC_g													0.000331019		InChI=1S/CCl3F/c2-1(3,4)5
148	C10H12O	Methyl chavicol (estragole)	NMOC_g		0.00433056		0.0502746	0.0323975	0.0152108			0.088582				0.0977505		InChI=1S/C10H12O/c1-3-4-9-5-7-10(11-2)8-6-9/h3,5-8H,1,4H2,2H3
148	C11H16	C11 aromatics	NMOC_g						0.0905199			0.0547965					0.207503	148.12416000000002_C11H16
148	C11H16	Benzene, pentyl-	NMOC_g		0.0690775		0.0625545	0.0239347								0.047994		InChI=1S/C11H16/c1-2-3-5-8-11-9-6-4-7-10-11/h4,6-7,9-10H,2-3,5,8H2,1H3
148	C11H16	Ethyl benzoate	NMOC_g		0.0127115													InChI=1S/C9H10O2/c1-2-11-9(10)8-6-4-3-5-7-8/h3-7H,2H2,1H3
148	C11H16	C11H16 isomers	NMOC_g				0.00901686											1629.48_1.465
148	C11H16	C11H16 isomers	NMOC_g		0.0802792		0.112711	0.0663851								0.015998		1664.47_1.456
148	C9H8O2	unknown	NMOC_g	0.0871743			0.115743	0.06193	0.0564785			0.180694				0.162282	0.0223868	148.051906_C9H8O2
148	C9H8O2	Cinnamic acid	NMOC_g		0.0509625													InChI=1S/C9H8O2/c10-9(11)7-6-8-4-2-1-3-5-8/h1-7H,(H,10,11)/b7-6+
148	C8H4O3	unknown	NMOC_g				0.0155779	0.0218539	0.0081291			0.019162				0.03688		148.01516_C8H4O3
149	C4H7NO5	Methyl vinyl ketone/methacrolein hydroxynitrates	NMOC_g				0.041127											149.07640999999998_C4H7NO5
149	C10H15N	unknown	NMOC_g				0.0021979	0.00142811	0.000387088			0.0210369				0.00207353		149.12016_C10H15N
149	C9H11NO	unknown	NMOC_g				0.00344433	0.00238018	0.000775546			0.0338927				0.00380148		149.08316000000002_C9H11NO
149	C8H7NO2	unknown	NMOC_g				0.0104502	0.00504599	0.00184552			0.0378997				0.0183162		149.04716000000002_C8H7NO2
149	C5H11NO4	unknown	NMOC_g				0.014749	0.00333226	0.00223535			0.0414059				0.0273015		149.06816_C5H11NO4
150	C9H10O2	Carvone	NMOC_g		0.00390127													InChI=1S/C10H14O/c1-7(2)9-5-4-8(3)10(11)6-9/h4,9H,1,5-6H2,2-3H3
150	C9H10O2	Vinyl guaiacol	NMOC_g	0.281787	0.348153		0.285146	0.113965	0.0572818	0.148935	0.0559502	0.998891				0.837363	0.0304461	InChI=1S/C9H10O2/c1-3-7-4-5-8(10)9(6-7)11-2/h3-6,10H,1H2,2H3
150	C10H14O	camphor/isomers	NMOC_g		0.0204352		0.0524491	0.0271423	0.00865142			0.0543975				0.0140747		152.237_C10H14O
150	C8H6O3	unknown	NMOC_g				0.028186	0.00680923	0.0115638			0.019404				0.0243733		150.03116_C8H6O3
150	C4H6O6	unknown	NMOC_g				0.00812348	0.00245889	0.00145007			0.0127702				0.016821		150.01616_C4H6O6
150	C11H18	unknown	NMOC_g					0.0308307	0.0404464			0.147603				0.0652764	0.0793986	150.14016_C11H18
150	C11H18	C11H18 isomers	NMOC_g		0.0909314		0.0262678											1794.43_1.342
151	C8H9NO2	unknown	NMOC_g				0.00599174	0.00281839	0.00114994			0.0680409				0.00511518		151.06316_C8H9NO2
151	C7H5NO3	unknown	NMOC_g				0.0034922	0.000939463	0.000769329			0.00280071				0.0057972		151.02616_C7H5NO3
152	C10H16O	Camphor + other oxygenated monoterpenes	NMOC_g				0.0802223	0.0265052	0.00677281			0.0585917				0.0291341		152.11916000000002_C10H16O
152	C11H20	unknown	NMOC_g						0.0049758			0.0476262						152.15616_C11H20
152	C11H20	1,10-Undecadiene	NMOC_g		0.00804193		0.0121014	0.00920527								0.0228426		InChI=1S/C11H20/c1-3-5-7-9-11-10-8-6-4-2/h3-4H,1-2,5-11H2
152	C11H20	C11H20 isomers	NMOC_g		0.0165865		0.0154196	0.00836843										1624.49_1.17
152	C12H8	Acenaphthylene	NMOC_g		0.0276441		0.0184322	0.00223988	0.0317065			0.00540091				0.00638721		InChI=1S/C12H8/c1-3-9-4-2-6-11-8-7-10(5-1)12(9)11/h1-8H
152	C8H8O3	Vanillin	NMOC_g				0.257364	0.0619938	0.0983013			0.455313				0.554903		InChI=1S/C8H8O3/c1-11-8-4-6(5-9)2-3-7(8)10/h2-5,10H,1H3
152	C9H12O2	unknown	NMOC_g				0.263142	0.0615033	0.0452693			0.505722				0.399408		152.08316000000002_C9H12O2
153	C8H11NO2	unknown	NMOC_g				0.00607753	0.00491407	0.000379636			0.0702407				0.0117794		153.07816000000003_C8H11NO2
153	C11H21	unknown	NMOC_g				0.00140935	0.00148349	0.000379636			0.0126824				0.00235588		153.16416_C11H21
153	C11H7N	unknown	NMOC_g				0.00848626	0.00259611	0.0119385			0.0182106				0.00706764		153.05716_C11H7N
153	C7H7NO3	Nitrocresol	NMOC_g	0.0203466			0.0101719		0.0412177							0.0302136		InChI=1S/C7H7NO3/c1-5-6(8(10)11)3-2-4-7(5)9/h2-4,9H,1H3
154	C10H18O	Cineole + other oxygenated monoterpenes	NMOC_g		0.00325709		0.0114144	0.0167651	0.00471464			0.0327923				0.0247433		154.13516_C10H18O
154	C9H14O2	unknown	NMOC_g				0.0185083	0.00746141	0.00037452			0.0352154				0.0361118		154.09916_C9H15O2
154	C9H14O2	2-Norbornaneacetic acid	NMOC_g		0.00398089													InChI=1S/C9H14O2/c10-9(11)5-8-4-6-1-2-7(8)3-6/h6-8H,1-5H2,(H,10,11)
154	C11H22	unknown	NMOC_g				0.0121298	0.0184232	0.00788481			0.0344077						154.17116000000001_C11H22
154	C11H22	1-Undecene	NMOC_g		0.0324941		0.0453988	0.0763188	0.037128							0.0171456		InChI=1S/C11H22/c1-3-5-7-9-11-10-8-6-4-2/h3H,1,4-11H2,2H3
154	C11H22	C11H22 isomers	NMOC_g		0.00446484		0.0232202	0.0417166								0.00623475		1429.55_1.047
154	C12H10	unknown	NMOC_g						0.0146341			0.0113077						154.07816000000003_C12H10
154	C12H10	Biphenyl	NMOC_g		0.015875		0.0182663	0.0135496								0.00537913		InChI=1S/C12H10/c1-3-7-11(8-4-1)12-9-5-2-6-10-12/h1-10H
154	C12H10	Acenaphthene	NMOC_g		0.00524754													InChI=1S/C12H10/c1-3-9-4-2-6-11-8-7-10(5-1)12(9)11/h1-6H,7-8H2
154	C7H6O4	unknown	NMOC_g				0.0199126	0.0023029	0.00433747			0.00823846				0.0123716		154.02616_C7H6O4
154	C8H10O3	Syringol	NMOC_g	0.0818687	0.0796987		0.142844	0.0770828	0.115915	0.409258	0.147724	0.276877				0.381755		InChI=1S/C8H10O3/c1-10-6-4-3-5-7(11-2)8(6)9/h3-5,9H,1-2H3
155	C6H5NO4	4-Nitrocatechol	NMOC_g	0.0959573			0.143079		0.230553							0.0973196		InChI=1S/C6H5NO4/c8-5-2-1-4(7(10)11)3-6(5)9/h1-3,8-9H
155	C6H5NO4	Nitrocatechol	NMOC_g	0.0267788			0.0156885		0.0379735							0.0455204		InChI=1S/C6H5NO4/c8-5-3-1-2-4(6(5)9)7(10)11/h1-3,8-9H
155	C7H9NO3	unknown	NMOC_g				0.00364749	0.00247109	0.000936844			0.0279264				0.00697644		155.05816000000002_C7H9NO3
156	C11H24	unknown	NMOC_g				0.00519215	0.00663827	0.0012042			0.0105249						156.18716_C11H24
156	C11H24	N-undecane	NMOC_g	0.0620833	0.0112639		0.0408527	0.0841993	0.0308578							0.00999649		InChI=1S/C11H24/c1-3-5-7-9-11-10-8-6-4-2/h3-11H2,1-2H3
156	C11H24	C11H24 isomers	NMOC_g					0.049083										1449.54_0.999
156	C10H20O	Decanal	NMOC_g				0.00692549	0.00973007	0.00121205			0.0110033				0.00759189		InChI=1S/C10H20O/c1-2-3-4-5-6-7-8-9-10-11/h10H,2-9H2,1H3
156	C9H16O2	unknown	NMOC_g				0.0150026	0.0095482	0.00407214			0.0236012				0.0112228		156.11416000000003_C9H16O2
156	C8H12O3	unknown	NMOC_g				0.0336262	0.0095482	0.00649625			0.0518269				0.0752587		156.07816000000003_C8H12O3
156	C7H8O4	unknown	NMOC_g				0.0316175	0.00591079	0.00991091			0.0570893				0.0571042		156.04216000000002_C7H8O4
156	C12H12	Naphthalene, 1-ethyl-	NMOC_g		0.0137125											0.0047736		InChI=1S/C12H12/c1-2-10-7-5-8-11-6-3-4-9-12(10)11/h3-9H,2H2,1H3
156	C12H12	Naphthalene, 1,6-dimethyl-	NMOC_g													0.0047736		InChI=1S/C12H12/c1-9-6-7-12-10(2)4-3-5-11(12)8-9/h3-8H,1-2H3
156	C12H12	1,3-Dimethylnaphthalene	NMOC_g		0.0137125		0.0437062	0.0643249	0.0207613			0.0838799				0.0139101		InChI=1S/C12H12/c1-9-7-10(2)12-6-4-3-5-11(12)8-9/h3-8H,1-2H3
156	C11H8O	unknown	NMOC_g				0.0163808	0.00245525	0.01302			0.0111627				0.012213		156.05716_C11H8O
157	C11H11N	unknown	NMOC_g				0.00281977	0.00216854	0.000645487			0.0239262				0.0032798		157.08816000000002_C11H11N
158	C6H6O5	unknown	NMOC_g				0.00657075	0.00107741	0.00156046			0.00472347				0.0091253		158.02116_C6H6O5
158	C10H22O	unknown	NMOC_g				0.00216197	0.00125698	0.000551434			0.00519581				0.00554036		158.16616000000002_C10H22O
158	C10H6O2	unknown	NMOC_g				0.0085065	0.00143655	0.00838085			0.00755755				0.010103		158.03616000000002_C10H6O2
158	C11H10O	unknown	NMOC_g				0.0375356	0.0172386	0.0144126			0.0768351				0.043997		158.07216000000003_C11H10O
158	C12H14	unknown	NMOC_g				0.033643	0.04992	0.0074665			0.0719541				0.0175988		158.10916_C12H14
158	C5H2O4S	unknown	NMOC_g				0.000491851	0.000179568				0.000629796				0.000325904		157.96716_C5H2O4S
158	C7H10O4	unknown	NMOC_g				0.0227362	0.00888863	0.00795897			0.0406218				0.0580109		158.05716_C7H10O4
158	C9H18O2	unknown	NMOC_g				0.0116338	0.00933755	0.00247564			0.0273961				0.00945121		158.13016000000002_C9H18O2
159	C10H9NO	unknown	NMOC_g				0.00207299	0.00142751	0.000544114			0.0162717				0.00291469		159.06816_C10H9ON
159	C11H13N	unknown	NMOC_g				0.00231355	0.00196283	0.000454712			0.0251898				0.00226698		159.10416_C11H13N
160	C11H12O	C11 aromatics/pentamethylbenzene	NMOC_g		0.00714072		0.0547411	0.0398092	0.0157581			0.127805						148.249_C11H12O
160	C11H12O	3,3-Dimethyl-1-indanone	NMOC_g													0.0433489		InChI=1S/C11H12O/c1-11(2)7-10(12)8-5-3-4-6-9(8)11/h3-6H,7H2,1-2H3
160	C10H8O2	unknown	NMOC_g				0.0365701	0.0182643	0.0159817			0.0533299				0.0569639		160.05216000000001_C10H8O2
161	C9H23NO	unknown	NMOC_g				0.000724471	0.000704889				0.00417191				0.00127932		161.17716000000001_C9H23NO
161	C9H7NO2	unknown	NMOC_g				0.00462957	0.00722511	0.00107851			0.0268856				0.00703628		161.04716000000002_C9H7NO2
161	C10H11NO	unknown	NMOC_g				0.00345921	0.00202656	0.000717741			0.0350749				0.0041578		161.08316000000002_C10H11NO
162	C10H10O2	unknown	NMOC_g				0.104041	0.041069	0.0285862			0.189187				0.136678		162.06716_C10H10O2
162	C11H14O	unknown	NMOC_g				0.016555	0.012347	0.00364674			0.0434578				0.0279714		162.10416_C11H14O
162	C12H18	C12 aromatics	NMOC_g						0.00284946			0.0285624						162.14016_C12H18
162	C12H18	Benzene, (1,3-dimethylbutyl)-	NMOC_g				0.00602347	0.00948944										InChI=1S/C12H18/c1-10(2)9-11(3)12-7-5-4-6-8-12/h4-8,10-11H,9H2,1-3H3
162	C12H18	Benzene, hexyl-	NMOC_g		0.00636653		0.00747741	0.0164542								0.00409793		InChI=1S/C12H18/c1-2-3-4-6-9-12-10-7-5-8-11-12/h5,7-8,10-11H,2-4,6,9H2,1H3
162	C9H22O2	unknown	NMOC_g				0.00738348	0.00472863	0.0014304			0.0170453				0.0123964		162.16116000000002_C9H22O2
162	C9H6O3	unknown	NMOC_g				0.0206519	0.0195275	0.00962025			0.0297909				0.0432285		162.03116_C9H6O3
163	C5H9NO5	Nitroxyhydroperoxide/nitroxyhydroxyepoxide	NMOC_g				0.0340142											163.10306999999997_C5H9NO5
163	C6H13NO4	unknown	NMOC_g				0.0047994	0.00156654	0.000978072			0.0120569				0.00410679		163.08416000000003_C6H13NO4
163	C9H9NO2	unknown	NMOC_g				0.0048497	0.00191466	0.00106528			0.020451				0.00537041		163.06316_C9H9O2N
164	CCl4	Carbon tetrachloride	NMOC_g													0.00237365		InChI=1S/CCl4/c2-1(3,4)5
164	C10H12O2	Eugenol + isoeugenol	NMOC_g				0.155599	0.0479206	0.0475325	0.182457	0.0491434	0.289877				0.160745		164.08316000000002_C10H12O2
164	C12H20	unknown	NMOC_g				0.0168288	0.0137534	0.00273551			0.0401975				0.0182109		164.15616_C12H20
164	C9H8O3	unknown	NMOC_g				0.0346076	0.00735244	0.0170728			0.0565798				0.0935662		164.04716000000002_C9H8O3
165	C12H21	unknown	NMOC_g				0.00268323	0.0027512	0.000438177			0.0129662				0.0028087		165.16416_C12H21
165	C10H15NO	unknown	NMOC_g				0.00137985	0.00128963	0.000349552			0.0162831				0.00187246		165.11516_C10H15NO
166	C10H14O2	unknown	NMOC_g				0.0674729	0.0154677	0.0125191			0.130379				0.0843737		166.09916_C10H14O2
166	C11H18O	unknown	NMOC_g				0.013388	0.0137586	0.00252391			0.0386641				0.0161303		166.13516_C11H18O
166	C12H22	unknown	NMOC_g						0.00200642			0.0145365				0.0139589		166.17116000000001_C12H22
166	C12H22	1,11-Dodecadiene	NMOC_g		0.0195598		0.0156041	0.00926139										InChI=1S/C12H22/c1-3-5-7-9-11-12-10-8-6-4-2/h3-4H,1-2,5-12H2
166	C4H6O7	unknown	NMOC_g				0.0030788	0.00111094	0.000785444			0.0034468				0.00434277		166.01116000000002_C4H7O7
166	C9H10O3	unknown	NMOC_g				0.137765	0.0494797	0.0278633			0.16215				0.165025		166.06216_C9H10O3
167	C9H13NO2	unknown	NMOC_g				0.00592041	0.00407738	0.000606835			0.0423057				0.0117169		167.09416000000002_C9H13NO2
168	C9H12O3	unknown	NMOC_g				0.0509728	0.0171413	0.0715502			0.18095				0.10789		168.07816000000003_C9H12O3
168	C8H8O4	unknown	NMOC_g				0.0446586	0.0221232	0.0107734			0.0350942				0.0419911		168.04216000000002_C8H8O4
168	C12H24	unknown	NMOC_g				0.00762104	0.014017	0.00413066			0.0247288						168.18716_C12H24
168	C12H24	1-Dodecene	NMOC_g		0.0286494		0.0273092	0.072701								0.0120238		InChI=1S/C12H24/c1-3-5-7-9-11-12-10-8-6-4-2/h3H,1,4-12H2,2H3
168	C12H24	C12H24 isomers	NMOC_g				0.00662651	0.061881										1844.42_1.087
168	C12H8O	unknown	NMOC_g				0.0213633	0.00759958	0.016036			0.0158442				0.0183903		168.05716_C12H9O
168	C11H20O	unknown	NMOC_g				0.011331	0.0112305	0.00233557			0.0229519				0.0119537		168.15116_C11H20O
168	C10H16S	unknown	NMOC_g				0.0207261	0.0130037	0.0069411			0.0300596				0.0125667		168.09716_C10H16S
168	C10H16O2	unknown	NMOC_g				0.0201595	0.00574191	0.00069148			0.0185096				0.0128732		168.11416000000003_C10H16O2
169	C10H19NO	unknown	NMOC_g				0.000829498	0.000587581	0.000343694			0.00662403				0.000914073		169.14616_C10H19NO
169	C7H7NO4	Nitromethylcatechol	NMOC_g	0.0143269			0.00805776		0.0199016							0.0230342		InChI=1S/C7H7NO4/c1-4-2-6(9)7(10)3-5(4)8(11)12/h2-3,9-10H,1H3
169	C8H11NO3	unknown	NMOC_g				0.00215749	0.00134304	0.000599654			0.0300289				0.00365629		169.07316_C8H11NO3
170	C7H6O5	unknown	NMOC_g				0.00422674	0.0010848	0.00153392			0.0033657				0.00545218		170.02116_C7H6O5
170	C10H18O2	unknown	NMOC_g				0.0104677	0.00559091	0.00246092			0.0158042				0.00424058		170.13016000000002_C10H18O2
170	C11H22O	unknown	NMOC_g				0.00593154	0.00776052	0.000854182			0.0127311				0.00726957		170.16616000000002_C11H22O
170	C12H10O	unknown	NMOC_g				0.0127992	0.0034213	0.00542714			0.0172675				0.00908696		170.07216000000003_C12H11O
170	C12H26	unknown	NMOC_g					0.00542402	0.00076336			0.00848742				0.00302899		170.20316000000003_C12H26
170	C12H26	Dodecane	NMOC_g				0.00655051	0.0643022										InChI=1S/C12H26/c1-3-5-7-9-11-12-10-8-6-4-2/h3-12H2,1-2H3
170	C12H26	C12H26 isomers	NMOC_g					0.00805609										1789.43_1.021
170	C13H14	unknown	NMOC_g				0.0411176	0.0561594	0.00929874			0.0712651				0.0160536		170.10916_C13H14
170	C8H10O4	unknown	NMOC_g				0.0165787	0.00509023	0.00537594			0.0260476				0.0311986		170.05716_C8H10O4
171	C7H9NO4	unknown	NMOC_g				0.0023281	0.00207396	0.000849187			0.00916518				0.00301127		171.05216000000001_C7H9NO4
171	C8H13NO3	unknown	NMOC_g				0.00351409	0.00257171	0.00126841			0.024295				0.00451691		171.08916000000002_C8H13NO3
172	C11H8O2	unknown	NMOC_g				0.0119469	0.00288666	0.00588482			0.0134509				0.0164657		172.05216000000001_C11H8O2
172	C12H12O	unknown	NMOC_g				0.0201859	0.011959	0.00770301			0.0420883				0.0260458		172.08816000000002_C12H12O
172	C13H16	unknown	NMOC_g				0.019486	0.031176	0.00334139			0.0458487				0.00419127		172.12416000000002_C13H16
172	C7H8O5	unknown	NMOC_g				0.0229179	0.00230933	0.00278424			0.0373154				0.0110769		172.03616000000002_C7H8O5
172	C8H12O4	unknown	NMOC_g				0.0183552	0.00981466	0.027876			0.0470058				0.0580791		172.07316_C8H12O4
172	C10H20O2	unknown	NMOC_g				0.00953676	0.00750533	0.00219149			0.0224182				0.0116757		172.14616_C10H20O2
172	CH2Br2	Dibromomethane	NMOC_g	0.002011			0.00103447	7.23856e-05	0.00139325							0.0047151		InChI=1S/CH2Br2/c2-1-3/h1H2
173	C11H11NO	unknown	NMOC_g				0.00147142	0.00122999	0.000335748			0.0129418				0.00178588		173.08316000000002_C11H11NO
174	C10H22O2	unknown	NMOC_g				0.00491974	0.00399488	0.000997935			0.0128674				0.00976587		174.16116000000002_C10H22O2
174	C11H10O2	unknown	NMOC_g				0.0278514	0.0122292	0.00977725			0.0511836				0.0440944		174.06716_C11H10O2
174	C12H14O	unknown	NMOC_g				0.0191744	0.017284	0.00455657			0.0501828				0.0260423		174.10416_C12H14O
174	C7H10O5	unknown	NMOC_g				0.0279019	0.0057885	0.0137232			0.0664814				0.0603709		174.05216000000001_C7H10O5
174	CHBrCl2	Bromodichloromethane	NMOC_g													0.00195758		InChI=1S/CHBrCl2/c2-1(3)4/h1H
175	C10H25NO	unknown	NMOC_g				0.000411193	0.000405311				0.00255877				0.000588489		175.19316_C10H25NO
175	C10H9NO2	unknown	NMOC_g				0.00278484	0.00478267	0.000660322			0.020328				0.00353093		175.06316_C10H9O2N
175	C11H13NO	unknown	NMOC_g				0.00131671	0.00072956	0.000329578			0.0153526				0.00176547		175.09916_C11H13NO
176	C10H8O3	unknown	NMOC_g				0.0178471	0.0123321	0.00738033			0.0310962				0.0298424		176.04716000000002_C10H8O3
176	C10H24O2	unknown	NMOC_g				0.00427635	0.00338527	0.000905828			0.0113077				0.00760689		176.17716000000001_C10H24O2
176	C11H12O2	unknown	NMOC_g				0.0327853	0.0148307	0.0088376			0.0754788				0.0526631		176.08316000000002_C11H13O2
176	C12H16O	unknown	NMOC_g				0.00760179	0.00652873	0.00139391			0.017951				0.00789946		176.11916000000002_C12H16O
176	C13H20	C13 aromatics	NMOC_g				0.0129032		0.0026228			0.0203538				0.00409602		176.15616_C13H20
176	C13H20	Benzene, heptyl-	NMOC_g					0.0146946										InChI=1S/C13H20/c1-2-3-4-5-7-10-13-11-8-6-9-12-13/h6,8-9,11-12H,2-5,7,10H2,1H3
178	C10H10O3	unknown	NMOC_g				0.0562448	0.0156204	0.0142161			0.0976908				0.0627749		178.06216_C10H10O3
178	C11H14O2	unknown	NMOC_g				0.01797	0.0059772	0.00420427			0.0451418				0.0315321		178.09916_C11H14O2
178	C12H18O	unknown	NMOC_g				0.00573677	0.00533963	0.000565894			0.0143951				0.00491785		178.13516_C12H18O
178	C13H22	unknown	NMOC_g				0.00612741	0.00828839	0.0017913			0.0163517				0.00549642		178.17116000000001_C13H22
179	C12H21N	unknown	NMOC_g				0.00160311	0.00229827	0.000324494			0.00694886				0.00143835		179.16716000000002_C12H21N
179	C9H9NO3	unknown	NMOC_g				0.00304354	0.00190202	0.00218178			0.0132028				0.0037397		179.05816000000002_C9H10NO3
180	C9H8O4	unknown	NMOC_g				0.00907874		0.00710941			0.0178285				0.0151618		180.04216000000002_C9H8O4
180	C13H24	unknown	NMOC_g						0.00361837			0.0179667				0.00800999		180.18716_C13H24
180	C13H24	1,12-Tridecadiene	NMOC_g		0.00615431		0.00725023	0.007732										InChI=1S/C13H24/c1-3-5-7-9-11-13-12-10-8-6-4-2/h3-4H,1-2,5-13H2
180	C12H20O	unknown	NMOC_g				0.0128882	0.00985131	0.00128736			0.0369008				0.0143036		180.15116_C12H20O
180	C10H12O3	unknown	NMOC_g				0.104027	0.0360952	0.0626151			0.190447				0.0912567		180.07816000000003_C10H12O3
180	C11H16S	unknown	NMOC_g				0.0239981	0.0163926	0.00622103			0.0772567				0.0308957		180.09716_C11H16S
181	C10H15NO2	unknown	NMOC_g				0.00294035	0.00211613	0.000477979			0.0215783				0.00512083		181.11016_C10H15NO2
182	C11H18O2	unknown	NMOC_g				0.00853504	0.00405311	0.000716394			0.0129852				0.00367806		182.13016000000002_C11H18O2
182	C10H14O3	unknown	NMOC_g				0.0274534	0.00568995	0.0398111			0.0757243				0.0288586		182.09416000000002_C10H14O3
182	C8H6O5	unknown	NMOC_g				0.00484534		0.000316902									182.02116_C8H6O5
182	C12H22O	unknown	NMOC_g				0.0111715	0.00865183	0.00119848			0.0192728				0.00792197		182.16616000000002_C12H22O
182	C13H26	unknown	NMOC_g					0.0122373	0.00285884			0.0181793						182.20316000000003_C13H26
182	C13H26	1-Tridecene	NMOC_g		0.0140623		0.011146	0.0362564								0.00597941		InChI=1S/C13H26/c1-3-5-7-9-11-13-12-10-8-6-4-2/h3H,1,4-13H2,2H3
182	C13H26	C13H26 isomers	NMOC_g					0.0243534								0.00341681		2069.34_1.096
182	C9H10O4	unknown	NMOC_g				0.0421387	0.0225259	0.0163478			0.0626024				0.0458342		182.05716_C9H10O4
182	C14H14	unknown	NMOC_g				0.0133851	0.0146536	0.00340894			0.0192728				0.0141464		182.10916_C14H14
183	C10H17NO2	unknown	NMOC_g				0.000901653	0.000852704	0.000310708			0.00720479				0.000844144		183.12516000000002_C10H17NO2
184	C14H16	unknown	NMOC_g				0.0160563	0.034077	0.00328464			0.0306906				0.00587689		184.12416000000002_C14H16
184	C11H20O2	unknown	NMOC_g				0.0102249	0.00663036	0.00258935			0.0163593				0.00475749		184.14616_C11H20O2
184	C12H24O	unknown	NMOC_g				0.0054594		0.00102761			0.0137905				0.00587689		184.18216_C12H24O
184	C12H24O	Dodecanal	NMOC_g					0.00486204										InChI=1S/C12H24O/c1-2-3-4-5-6-7-8-9-10-11-12-13/h12H,2-11H2,1H3
184	C13H28	Tridecane	NMOC_g		0.00581292		0.00715034	0.0393132								0.0021585		InChI=1S/C13H28/c1-3-5-7-9-11-13-12-10-8-6-4-2/h3-13H2,1-2H3
184	C13H28	C13H28 isomers	NMOC_g				0.00330016	0.0236827								0.00107925		1909.4_1.021
184	C4H8O8	unknown	NMOC_g				0.000391694											184.02116_C4H8O8
185	C8H11NO4	unknown	NMOC_g				0.00151926	0.00107353	0.00031397			0.0274318				0.00278339		185.06816_C8H11NO4
186	C14H18	unknown	NMOC_g				0.0122747	0.0279142	0.00208979			0.0299593				0.00498317		186.14016_C14H18
186	C12H26O	unknown	NMOC_g				0.00161677	0.00160163	0.000544846			0.00454739				0.00249159		186.19816_C12H26O
186	C9H14O4	unknown	NMOC_g				0.00693521	0.00518624	0.00853836			0.0218007				0.0113506		186.08816000000002_C9H14O4
186	C12H10O2	unknown	NMOC_g				0.0103429	0.00205924	0.0039569			0.00708859				0.0110737		186.06716_C12H10O2
186	C8H10O5	unknown	NMOC_g				0.0273222	0.0122029	0.00396019			0.0509576				0.0251927		186.05216000000001_C8H10O5
188	C14H20	unknown	NMOC_g				0.0110018		0.00268222			0.0292436				0.00301288		188.15616_C14H20
188	C14H20	C14H20 isomers	NMOC_g					0.0236788										2584.18_1.91
188	C13H16O	unknown	NMOC_g				0.00820965	0.00799843	0.00205779			0.0223628				0.00903863		188.11916000000002_C13H16O
188	C12H12O2	unknown	NMOC_g				0.0162708	0.00611201	0.00492381			0.0303022				0.0216379		188.08316000000002_C12H12O2
189	C12H15NO	unknown	NMOC_g				0.00106185	0.000750576	0.000305165			0.00908205				0.00136224		189.11516_C12H15NO
189	C11H11NO2	unknown	NMOC_g				0.00203847	0.00232679	0.000536198			0.0144786				0.00272449		189.07816000000003_C11H12NO2
190	C11H10O3	unknown	NMOC_g				0.0147468	0.00574902	0.00425412			0.0250079				0.018429		190.06216_C11H10O3
190	C12H14O2	unknown	NMOC_g				0.0121609	0.0067943	0.00341181			0.0319472				0.018429		190.09916_C12H14O2
190	C14H22	unknown	NMOC_g				0.0155327	0.0278491	0.00597809			0.0490992				0.00948551		190.17116000000001_C14H22
190	C7H10O6	unknown	NMOC_g				0.00791686	0.0017919	0.00121961			0.0107364				0.00650435		190.04716000000002_C7H10O6
192	C10H8O4	unknown	NMOC_g				0.00351538	0.00140381	0.00120052			0.00349832				0.00268192		192.04216000000002_C10H8O4
192	C11H12O3	unknown	NMOC_g				0.0152557	0.00568913	0.00728674			0.048199				0.0236009		192.07816000000003_C11H12O3
192	C12H16O2	unknown	NMOC_g				0.00722129	0.00458086	0.00158027			0.0237108				0.0107277		192.11416000000003_C12H16O2
192	C13H20O	unknown	NMOC_g				0.00937934	0.00820122	0.00180238			0.0220264				0.0064366		192.15116_C13H20O
192	C14H24	unknown	NMOC_g				0.00635108	0.0118216	0.00158027			0.0187873				0.00590022		192.18716_C14H24
194	C10H10O4	unknown	NMOC_g				0.0132587	0.00687358	0.00230618			0.0110279				0.00928994		194.05716_C10H10O4
194	C11H14O3	unknown	NMOC_g				0.0191553	0.00687358	0.037533			0.11605				0.025481		194.09416000000002_C11H14O3
194	C12H18O2	unknown	NMOC_g				0.00528082	0.0040949	0.000299404			0.0161572				0.00583939		194.13016000000002_C12H18O2
194	C13H22O	unknown	NMOC_g				0.00566739	0.00584985	0.000522379			0.0133361				0.0039814		194.16616000000002_C13H22O
194	C14H26	unknown	NMOC_g				0.0027016	0.00343679	0.00164041			0.0110279				0.00318512		194.20316000000003_C14H26
194	C14H26	C14H26 isomers	NMOC_g					0.013798										2234.29_1.285
195	C11H17NO2	unknown	NMOC_g				0.00344669	0.00254619	0.000297869			0.0261527				0.00633757		195.12516000000002_C11H17NO2
195	C2F3Cl3	Trichlorotrifluoroethane	NMOC_g													0.000623843		InChI=1S/C2Cl3F3/c3-1(4,5)2(6,7)8
196	C14H28	unknown	NMOC_g				0.0043758		0.00140297			0.0145962						196.21816_C14H28
196	C14H28	1-Tetradecene	NMOC_g		0.0105243			0.0163586								0.00553534		InChI=1S/C14H28/c1-3-5-7-9-11-13-14-12-10-8-6-4-2/h3H,1,4-14H2,2H3
196	C14H28	C14H28 isomers	NMOC_g					0.00807525										2109.33_1.082
196	C15H16	unknown	NMOC_g				0.00795516	0.00955376	0.00235204			0.0142154				0.00394077		196.12416000000002_C15H16
196	C10H12O4	unknown	NMOC_g				0.0101752	0.00709295	0.00730808			0.0354115				0.0202293		196.07316_C10H12O4
196	C13H24O	unknown	NMOC_g				0.00452576	0.00564541	0.00110975			0.0104077				0.00420349		196.18216_C13H24O
196	C12H20O2	unknown	NMOC_g				0.00462028	0.00354647	0.000737748			0.00850385				0.00262718		196.14616_C12H20O2
196	C12H20O2	Bornyl acetate	NMOC_g		0.0779575													InChI=1S/C12H20O2/c1-8(13)14-10-7-9-5-6-12(10,4)11(9,2)3/h9-10H,5-7H2,1-4H3
197	C10H15NO3	unknown	NMOC_g				0.00127769	0.00115215	0.000294844			0.00984975				0.00130692		197.10416_C10H15NO3
197	C9H11NO4	unknown	NMOC_g				0.000941701	0.000792106	0.000294844			0.0059351				0.00130692		197.06816_C9H11NO4
198	C10H14O4	unknown	NMOC_g				0.00578725	0.00300913	0.00561771			0.0174641				0.0088422		198.08816000000002_C10H14O4
198	C12H22O2	unknown	NMOC_g				0.0137177	0.00637649	0.00167597			0.0138205				0.0036409		198.16116000000002_C12H22O2
198	C13H10O2	unknown	NMOC_g				0.00445441	0.00272254	0.00167906			0.00691026				0.00520129		198.06716_C13H10O2
198	C13H26O	unknown	NMOC_g				0.00448152	0.00802434	0.00117342			0.0162077				0.00598149		198.19816_C13H26O
198	C14H14O	unknown	NMOC_g				0.0045945	0.00179115	0.00204112			0.00992564				0.00546136		198.10416_C14H14O
198	C14H30	Tetradecane	NMOC_g					0.0165375								0.00125367		InChI=1S/C14H30/c1-3-5-7-9-11-13-14-12-10-8-6-4-2/h3-14H2,1-2H3
198	C15H18	unknown	NMOC_g				0.00762655	0.032169	0.0015262			0.0170872				0.00260065		198.14016_C15H18
198	C9H10O5	unknown	NMOC_g				0.00265643	0.0017195	0.000948766			0.00402051				0.00416103		198.05216000000001_C9H10O5
199	C10H17NO3	unknown	NMOC_g				0.000886141	0.000855431	0.00028983			0.00837565				0.000776273		199.12016_C10H17NO3
200	C10H16O4	unknown	NMOC_g				0.0044237	0.00368833	0.00511365			0.0135579				0.00489181		200.10416_C10H16O4
200	C12H24O2	unknown	NMOC_g				0.00926144	0.00397205	0.000577782			0.0144286				0.0028321		200.17716000000001_C12H24O2
200	C14H16O	unknown	NMOC_g				0.00372752	0.00283718	0.00158813			0.00895569				0.00386196		200.11916000000002_C14H16O
200	C15H20	unknown	NMOC_g				0.00882084		0.00201152			0.0203991				0.00257464		200.15616_C15H20
200	C15H20	À-calacorene	NMOC_g					0.0166761										InChI=1S/C15H20/c1-10(2)13-8-6-12(4)14-7-5-11(3)9-15(13)14/h5-7,9-10,13H,8H2,1-4H3/t13-/m0/s1
200	C8H8O6	unknown	NMOC_g				0.00135844	0.000567436	0.000361496			0.001617				0.00180225		200.03116_C8H8O6
200	C9H12O5	unknown	NMOC_g				0.00433984	0.00262439	0.00101035			0.0109458				0.00746645		200.06816_C9H12O5
202	C15H22	unknown	NMOC_g				0.0158198		0.00433809			0.0405174				0.00331389		202.17116000000001_C15H22
202	C15H22	Calamenene	NMOC_g		0.0128591			0.0227528										InChI=1S/C15H22/c1-10(2)13-8-6-12(4)14-7-5-11(3)9-15(13)14/h5,7,9-10,12-13H,6,8H2,1-4H3
202	C12H10O3	unknown	NMOC_g				0.00417833	0.00175568	0.00171618			0.00541874				0.00458847		202.06216_C12H10O3
202	C9H14O5	unknown	NMOC_g				0.00372304	0.00161523	0.00243808			0.00652711				0.00331389		202.08316000000002_C9H14O5
203	C12H13NO2	unknown	NMOC_g				0.000619388	0.00055905	0.000284119			0.00477931				0.000760977		203.09416000000002_C12H13NO2
204	C15H24	Sesquiterpenes	NMOC_g		0.00232219			0.188728	0.0274367			0.208039				0.0290278	0.0592044	204.18716_C15H24
204	C15H24	B-caryophyllene	NMOC_g		0.0136693													InChI=1S/C15H24/c1-11-6-5-7-12(2)13-10-15(3,4)14(13)9-8-11/h6,13-14H,2,5,7-10H2,1,3-4H3/b11-6+/t13-,14-/m1/s1
204	C15H24	Germacrene d	NMOC_g		0.0114223		0.0202406											InChI=1S/C15H24/c1-12(2)15-10-8-13(3)6-5-7-14(4)9-11-15/h7-8,10,12,15H,3,5-6,9,11H2,1-2,4H3/b10-8+,14-7+/t15-/m0/s1
204	C15H24	Copaene	NMOC_g		0.00917529		0.00840498											InChI=1S/C15H24/c1-9(2)11-7-8-15(4)12-6-5-10(3)14(15)13(11)12/h5,9,11-14H,6-8H2,1-4H3
204	C15H24	À-cubebene	NMOC_g		0.0095498													InChI=1S/C15H24/c1-9(2)12-6-5-11(4)15-8-7-10(3)13(15)14(12)15/h7,9,11-14H,5-6,8H2,1-4H3
204	C15H24	Cadinene isomers	NMOC_g		0.0986812		0.0367074											2484.21_1.448
204	C15H24	C15H24 isomers	NMOC_g		0.0262151		0.0300178											2319.26_1.39
204	C8H12O6	unknown	NMOC_g				0.0118287	0.00312924	0.00254453			0.017926				0.013378		204.06316_C8H12O6
204	C12H12O3	unknown	NMOC_g				0.0120735	0.00445048	0.0038198			0.0195113				0.0118635		204.07816000000003_C12H12O3
205	C12H15NO2	unknown	NMOC_g				0.000730788	0.000484396	0.000281347			0.00521809				0.000753553		205.11016_C12H15NO2
205	C11H11NO3	unknown	NMOC_g				0.000863048	0.000761194	0.000352679			0.00546079				0.00100474		205.07316_C11H11NO3
206	C12H14O3	unknown	NMOC_g				0.0062064	0.00247909	0.0024538			0.0147329				0.00724898		206.09416000000002_C12H14O3
206	C15H26	unknown	NMOC_g				0.00526187		0.00119091			0.0175105				0.00399944		206.20316000000003_C15H26
206	C15H26	Patchulane	NMOC_g					0.00976037										InChI=1S/C15H26/c1-10-7-8-15-11(2)5-6-12(9-13(10)15)14(15,3)4/h10-13H,5-9H2,1-4H3
206	C15H26	Ledane	NMOC_g					0.00783343										InChI=1S/C15H26/c1-9-6-8-12-14(15(12,3)4)13-10(2)5-7-11(9)13/h9-14H,5-8H2,1-4H3/t9-,10-,11+,12+,13+,14+/m0/s1
206	C15H26	C15H26 isomers	NMOC_g					0.00724697										2504.2_1.373
206	C9H18O5	unknown	NMOC_g				0.00613168	0.00406295	0.00188393			0.0117139				0.0049993		206.11516_C9H18O5
206	C11H10O4	unknown	NMOC_g				0.00290857	0.00110182	0.00104993			0.00422666				0.00299958		206.05716_C11H10O4
208	C11H12O4	unknown	NMOC_g				0.00409661	0.00211424	0.00326207			0.0165049				0.00668416		208.07316_C11H12O4
208	C13H20O2	unknown	NMOC_g				0.00543397	0.00388748	0.00193121			0.0202125				0.00445611		208.14616_C13H20O2
208	C14H24O	unknown	NMOC_g				0.00404024	0.00456949	0.000971493			0.00956805				0.00222805		208.18216_C14H24O
208	C15H28	unknown	NMOC_g				0.00207469	0.00368288	0.000555559			0.00633883				0.00247561		208.21816_C15H28
209	C12H19NO2	unknown	NMOC_g				0.00248103	0.00196838	0.000275962			0.02083				0.00492754		209.14116_C12H19NO2
210	C11H14O4	unknown	NMOC_g				0.00482616	0.00439087	0.0063914			0.0221523				0.0066205		210.08816000000002_C11H14O4
210	C14H26O	unknown	NMOC_g				0.00479317	0.00520149	0.00123883			0.0106615				0.00269724		210.19816_C14H26O
210	C15H14O	unknown	NMOC_g				0.00415781	0.00358025	0.00205986			0.0110169				0.00514928		210.10416_C15H14O
210	C15H30	unknown	NMOC_g				0.00476244		0.00110345			0.0144523				0.00465887		210.23416_C15H30
210	C15H30	1-Pentadecene	NMOC_g					0.0119579										InChI=1S/C15H30/c1-3-5-7-9-11-13-15-14-12-10-8-6-4-2/h3H,1,4-15H2,2H3
212	C15H32	Pentadecane	NMOC_g					0.00534424										InChI=1S/C15H32/c1-3-5-7-9-11-13-15-14-12-10-8-6-4-2/h3-15H2,1-2H3
212	C15H32	C15H32 isomers	NMOC_g					0.0207897										2259.28_1.03
244	C3H3Br2Cl	1,2-Dibromo-3-chloropropene	NMOC_g													0.000598276		InChI=1S/C3H3Br2Cl/c4-1-3(5)2-6/h1H,2H2
250	CHBr3	Tribromomethane	NMOC_g		0.000305593			0.00249006										InChI=1S/CHBr3/c2-1(3)4/h1H
				AVG_savanna_g/g CO	AVG_boreal_forest_g/g CO	AVG_tropical_forest_g/g CO	AVG_temperate_forest_g/g CO	AVG_peat_g/g CO	AVG_chaparral_g/g CO	AVG_open_cooking_g/g CO	AVG_cookstove_g/g CO	AVG_dung_burning_g/g CO	AVG_charcoal_making_g/g CO	AVG_charcoal_burning_g/g CO	AVG_pasture_maintenance_g/g CO	AVG_crop_residue_g/g CO	AVG_garbage_burning_g/g CO
		PM2.5*	PM size	0.217063	0.127096	0.0822037	0.186923	0.110185	0.226939	0.112347	0.0844093	0.133409		0.00789162	0.0545549	0.221338	0.186125	PM2.5*
		PM10	PM size			0.167026									0.106526			PM10
		OA	PM organic	0.337739	0.0656847		0.178138		0.161838		0.0397737	0.0243341				0.195014	0.141406	OA
		BC	PM elemental	0.00431954	0.00129379	0.00310397	0.00453503	7.12929e-05	0.00936399	0.00758461	0.0055496	0.00129645	0.000274278		0.00335893	0.00774629	0.0379589	BC
		OC	PM organic	0.0801318		0.0360234	0.108703	0.0585758	0.162763	0.0566327	0.0404251	0.0946945	0.0101483	0.00394581	0.0355825	0.164599	0.105179	OC
		EC	PM elemental					0.00192091		0.00182398	0.0115628	0.00791676		0.000657635		0.00867465	0.00368249	EC
		Water-soluble OC fraction	PM organic					0.0231754										WSOC
		Water-insoluble OC fraction	PM organic					0.0463152										WIOC
88.02	C2O4-2	Oxalate	PM ion	6.79432e-05		0.000361137									0.000147645			InChI=1S/C2H2O4/c3-1(4)2(5)6/h(H,3,4)(H,5,6)/p-2
35.45	Cl-	chloride	PM ion	0.00582767	0.00338376	0.00102924	0.00141213	0.000285112	0.00544545	0.00946173	0.00487142	0.013319			0.00088587	0.0164409	0.00209687	InChI=1S/ClH/h1H/p-1
62.005	NO3-	nitrate	PM ion	0.00238264	0.00129379	0.000778249	0.0057078	0.000111164	0.00705706	0.0013801	0.000360103	0.000136302			0.000516758	0.0041345	0.000571786	InChI=1S/NO3/c2-1(3)4/q-1
94.971	O4P-3	phosphate	PM ion	5.55899e-05		5.05591e-05									3.69113e-06			InChI=1S/H3O4P/c1-5(2,3)4/h(H3,1,2,3,4)/p-3
96.07	O4S-2	sulfate	PM ion	0.00109018	0.00114451	0.00078475	0.00129749	0.000270972	0.00639139	0.000757653	0.000328582	0.000327406			0.000701314	0.00201706	0.000335063	InChI=1S/H2O4S/c1-5(2,3)4/h(H2,1,2,3,4)/p-2
22.9898	Na	sodium	PM ion	0.000247066											0.000110734	0.0142504		InChI=1S/Na
18.039	H4N+	ammonium	PM ion	0.00182057	0.000995223	0.000133846	0.00199544	0.000229264	0.00507508	0.00472959	0.00170595	0.00292628			1.47645e-05	0.0052736	0.00135691	InChI=1S/H3N/h1H3/p+1
39.0983	K	potassium	PM ion	0.00133416	0.00328424		0.00179252	7.55023e-05	0.0135135						0.00125498	0.00639094		InChI=1S/K
24.305	Mg	magnesium	PM ion												0.000110734			InChI=1S/Mg
40.08	Ca	calcium	PM ion	0.000259419				2.62346e-05							7.38225e-05	0.000104271		InChI=1S/Ca
22.9898	Na+	sodium ion	PM ion	6.79432e-05		5.73304e-05		1.9876e-05			7.25937e-05	0.000597551						InChI=1S/Na/q+1
39.0983	K+	potassium ion	PM ion	0.00279185		0.00264833		0.000105027		0.00205102	0.0027108	0.000807274				0.014405	0.000221026	InChI=1S/K/q+1
24.305	Mg+2	magnesium ion	PM ion	0.000197653		0.000361137												InChI=1S/Mg/q+2
40.08	Ca+2	calcium ion	PM ion	0.000253243		0.000767415												InChI=1S/Ca/q+2
70.9	Cl2	Chlorine	PM ion					0.000179996			0.00149008	0.00406272				0.00695574	0.00377346	InChI=1S/Cl2/c1-2
		PAH	PM ion								0.000353417	0.000131735				0.000104271	0.000198603	PAH
		EF Babs 370 (m2/kg)	PM ion								0.419295	0.159184				0.413065	0.615318	Babs_370
		EF Babs 880 (m2/kg)	PM ion								0.0541014	0.0100646				0.0638529	0.213531	Babs_880
18.9984	F-	Fluoride	PM ion	1.23533e-05	0.000328424		0.000458552	5.06906e-05	0.00042042	4.59184e-05	0.000124173	6.00713e-05				0.000799411	0.000196041	InChI=1S/FH/h1H/p-1
46.006	NO2	Nitrite	PM ion					8.92643e-05										InChI=1S/HNO2/c2-1-3/h(H,2,3)/p-1
58.69	Ni	Nickel	PM metal					1.18574e-06		1.27551e-05						3.4757e-05		InChI=1S/Ni
63.55	Cu	Copper	PM metal					3.68174e-05			7.64144e-06	1.05388e-06					5.7659e-06	InChI=1S/Cu
74.92	As	Arsenic	PM metal					5.00236e-07			5.73108e-06	1.05388e-06					1.92197e-06	InChI=1S/As
78.97	Se	Selenium	PM metal					1.51182e-06			9.5518e-06						1.92197e-06	InChI=1S/Se
112.41	Cd	Cadmium	PM metal					3.85367e-06		2.55102e-06	3.82072e-06	1.05388e-06				1.73785e-06	1.92197e-06	InChI=1S/Cd
121.76	Sb	Antimony	PM metal					2.81614e-06			7.64144e-06						3.45954e-05	InChI=1S/Sb
207	Pb	Lead	PM metal					3.16816e-06			1.14622e-05	6.32329e-06					8.07227e-05	InChI=1S/Pb
55.84	Fe	Fe	PM metal					3.59725e-05										InChI=1S/Fe
65.4	Zn	Zn	PM metal					1.89867e-05										InChI=1S/Zn
137.33	Ba	Ba	PM metal					1.04494e-05										InChI=1S/Ba
26.9815	Al	Aluminum	PM metal					9.37331e-05										InChI=1S/Al
28.085	Si	Silicon	PM metal					1.20057e-05										InChI=1S/Si
30.9738	P	Phosphorus	PM metal					4.44654e-07										InChI=1S/P
32.07	S	Sulfur	PM metal					0.000134197										InChI=1S/S
44.9559	Sc	Scandium	PM metal					7.0033e-05										InChI=1S/Sc
47.87	Ti	Titanium	PM metal					5.95837e-06										InChI=1S/Ti
50.941	V	Vanadium	PM metal					4.44654e-07										InChI=1S/V
51.996	Cr	Chromium	PM metal					1.11164e-06										InChI=1S/Cr
54.938	Mn	Manganese	PM metal					4.00189e-06										InChI=1S/Mn
159.81	Br	Bromine	PM metal					1.10274e-05										InChI=1S/Br2/c1-2
85.468	Rb	Rubidium	PM metal					1.42289e-06										InChI=1S/Rb
87.6	Sr	Strontium	PM metal					4.8912e-06										InChI=1S/Sr
88.9058	Y	Yttrium	PM metal					3.29044e-06										InChI=1S/Y
91.22	Zr	Zirconium	PM metal					4.53547e-06										InChI=1S/Zr
92.9064	Nb	Niobium	PM metal					1.33396e-06										InChI=1S/Nb
96	Mo	Molybdenum	PM metal					2.57899e-06										InChI=1S/Mo
107.868	Ag	Silver	PM metal					2.33443e-06										InChI=1S/Ag
114.82	In	Indium	PM metal					3.4683e-06										InChI=1S/In
118.71	Sn	Tin	PM metal					6.93661e-06										InChI=1S/Sn
132.905	Cs	Cesium	PM metal					1.96537e-05										InChI=1S/Cs
138.905	La	Lanthanum	PM metal					5.46035e-05										InChI=1S/La
183.8	W	Wolfram	PM metal					6.00283e-06										InChI=1S/W
196.967	Au	Gold	PM metal					2.22327e-06										InChI=1S/Au
238.029	U	Uranium	PM metal					3.4683e-06										InChI=1S/U
		organics	NMOC_p	0.0704138														org
178.23	C14H10	Phenanthrene	NMOC_p							6.37755e-06	1.14622e-05	1.68621e-05				3.4757e-06	9.60984e-06	InChI=1S/C14H10/c1-3-7-13-11(5-1)9-10-12-6-2-4-8-14(12)13/h1-10H
178.23	C14H10	Anthracene	NMOC_p					4.44654e-07			3.82072e-06	1.05388e-05				1.73785e-06	1.92197e-06	InChI=1S/C14H10/c1-2-6-12-10-14-8-4-3-7-13(14)9-11(12)5-1/h1-10H
202.25	C16H10	Fluoranthene	NMOC_p					1.77862e-06		2.67857e-05	7.4504e-05	5.48019e-05				2.60677e-05	2.11416e-05	InChI=1S/C16H10/c1-2-8-13-12(7-1)14-9-3-5-11-6-4-10-15(13)16(11)14/h1-10H
202.25	C16H10	Pyrene	NMOC_p					3.11258e-06		3.18878e-05	9.16973e-05	5.16402e-05				2.78056e-05	2.69076e-05	InChI=1S/C16H10/c1-3-11-7-9-13-5-2-6-14-10-8-12(4-1)15(11)16(13)14/h1-10H
216.28	C17H12	Methylfluoranthene	NMOC_p					2.22327e-06		1.27551e-05	3.05658e-05	1.89699e-05				1.21649e-05	5.7659e-06	InChI=1S/C17H12/c1-11-9-12-5-4-8-15-13-6-2-3-7-14(13)16(10-11)17(12)15/h2-10H,1H3
192.25	C15H12	9-Methylanthracene	NMOC_p							5.10204e-06	1.91036e-06	3.16165e-06				1.04271e-05	3.84394e-06	InChI=1S/C15H12/c1-11-14-8-4-2-6-12(14)10-13-7-3-5-9-15(11)13/h2-10H,1H3
226.3	C18H10	Benzo(ghi)fluoranthene	NMOC_p					4.44654e-07		1.65816e-05	9.16973e-05	4.74247e-05				1.91163e-05	2.30636e-05	InChI=1S/C18H10/c1-3-11-7-9-13-10-8-12-4-2-6-15-14(5-1)16(11)18(13)17(12)15/h1-10H
226.3	C18H10	Cyclopenta(cd)pyrene	NMOC_p					4.44654e-07		1.02041e-05	0.000122263	5.26941e-05				5.21355e-06	9.60984e-06	InChI=1S/C18H10/c1-2-11-4-6-13-7-5-12-8-9-15-10-14(3-1)16(11)18(13)17(12)15/h1-10H
228.3	C18H12	Benz(a)anthracene	NMOC_p					1.33396e-06		2.29592e-05	8.02351e-05	4.53169e-05				1.39028e-05	1.15318e-05	InChI=1S/C18H12/c1-2-7-15-12-18-16(11-14(15)6-1)10-9-13-5-3-4-8-17(13)18/h1-12H
228.3	C18H12	Chrysene	NMOC_p					3.11258e-06		2.16837e-05	5.92212e-05	2.84548e-05				1.21649e-05	1.72977e-05	InChI=1S/C18H12/c1-3-7-15-13(5-1)9-11-18-16-8-4-2-6-14(16)10-12-17(15)18/h1-12H
242.3	C19H14	1-Methylchrysene	NMOC_p					8.89308e-07		5.10204e-06	9.5518e-06	5.26941e-06				3.4757e-06		InChI=1S/C19H14/c1-13-5-4-8-17-15(13)11-12-18-16-7-3-2-6-14(16)9-10-19(17)18/h2-12H,1H3
234.3	C18H18	Retene	NMOC_p					1.77862e-06				3.16165e-06				5.21355e-06	2.11416e-05	InChI=1S/C18H18/c1-12(2)14-7-10-17-15(11-14)8-9-16-13(3)5-4-6-18(16)17/h4-12H,1-3H3
252.3	C20H12	Benzo(b)fluoranthene	NMOC_p					1.33396e-06		1.65816e-05	6.8773e-05	3.68859e-05				1.39028e-05	1.34538e-05	InChI=1S/C20H12/c1-2-7-14-13(6-1)12-19-16-9-4-3-8-15(16)18-11-5-10-17(14)20(18)19/h1-12H
252.3	C20H12	Benzo(k)fluoranthene	NMOC_p							6.37755e-06	2.86554e-05	1.58082e-05				5.21355e-06	1.15318e-05	InChI=1S/C20H12/c1-2-6-15-12-19-17-10-4-8-13-7-3-9-16(20(13)17)18(19)11-14(15)5-1/h1-12H
252.3	C20H12	Benzo(j)fluoranthene	NMOC_p							2.04082e-05	3.05658e-05	1.7916e-05				3.4757e-06	3.84394e-06	InChI=1S/C20H12/c1-2-8-15-13(5-1)11-12-17-16-9-3-6-14-7-4-10-18(19(14)16)20(15)17/h1-12H
252.3	C20H12	Benzo(e)pyrene	NMOC_p					1.77862e-06		1.14796e-05	3.05658e-05	1.7916e-05				1.04271e-05	1.15318e-05	InChI=1S/C20H12/c1-2-8-16-15(7-1)17-9-3-5-13-11-12-14-6-4-10-18(16)20(14)19(13)17/h1-12H
252.3	C20H12	Benzo(a)pyrene	NMOC_p					4.44654e-07		1.14796e-05	6.68626e-05	3.16165e-05				1.04271e-05	1.15318e-05	InChI=1S/C20H12/c1-2-7-17-15(4-1)12-16-9-8-13-5-3-6-14-10-11-18(17)20(16)19(13)14/h1-12H
252.3	C20H12	Perylene	NMOC_p					4.44654e-07			1.33725e-05	7.37717e-06					1.92197e-06	InChI=1S/C20H12/c1-5-13-6-2-11-17-18-12-4-8-14-7-3-10-16(20(14)18)15(9-1)19(13)17/h1-12H
276.3	C22H12	Indeno(1,2,3-cd)pyrene	NMOC_p							6.37755e-06	4.20279e-05	1.89699e-05				6.9514e-06	9.60984e-06	InChI=1S/C22H12/c1-2-7-17-16(6-1)18-11-10-14-9-8-13-4-3-5-15-12-19(17)22(18)21(14)20(13)15/h1-12H
276.3	C22H12	Benzo(ghi)perylene	NMOC_p					8.89308e-07		5.10204e-06	3.82072e-05	2.84548e-05				6.9514e-06	9.60984e-06	InChI=1S/C22H12/c1-3-13-7-9-15-11-12-16-10-8-14-4-2-6-18-17(5-1)19(13)21(15)22(16)20(14)18/h1-12H
278.3	C22H14	Dibenz[a,h]anthracene	NMOC_p					4.44654e-07		3.82653e-06	7.64144e-06	5.26941e-06					1.92197e-06	InChI=1S/C22H14/c1-3-7-19-15(5-1)9-11-17-14-22-18(13-21(17)19)12-10-16-6-2-4-8-20(16)22/h1-14H
278.3	C22H14	Picene	NMOC_p					8.89308e-07		1.27551e-06	1.91036e-05	1.26466e-05					1.92197e-06	InChI=1S/C22H14/c1-3-7-17-15(5-1)9-11-21-19(17)13-14-20-18-8-4-2-6-16(18)10-12-22(20)21/h1-14H
306.4	C24H18	Triphenylbenzene	NMOC_p														3.84394e-06	InChI=1S/C24H18/c1-4-10-19(11-5-1)22-16-23(20-12-6-2-7-13-20)18-24(17-22)21-14-8-3-9-15-21/h1-18H
370.65	C27H46	17(H)-22,29,30-Trisnorhopane	NMOC_p					1.91201e-05										C27H46_370.65
268.5	C19H40	Pristane	NMOC_p					5.51371e-05			1.91036e-06	1.37005e-05				1.91163e-05	4.22833e-05	InChI=1S/C19H40/c1-16(2)10-7-12-18(5)14-9-15-19(6)13-8-11-17(3)4/h16-19H,7-15H2,1-6H3
254.5	C18H38	Norpristane	NMOC_p					1.91201e-05				4.21553e-06				6.9514e-06	2.30636e-05	InChI=1S/C18H38/c1-6-7-8-12-17(4)14-10-15-18(5)13-9-11-16(2)3/h16-18H,6-15H2,1-5H3
282.5	C20H42	Phytane	NMOC_p									2.10776e-06				1.73785e-06	3.84394e-06	InChI=1S/C20H42/c1-7-18(4)12-9-14-20(6)16-10-15-19(5)13-8-11-17(2)3/h17-20H,7-16H2,1-6H3
422.8	C30H62	Squalane	NMOC_p					7.2034e-05		7.14286e-05		1.47543e-05				1.04271e-05	3.84394e-05	InChI=1S/C30H62/c1-25(2)15-11-19-29(7)23-13-21-27(5)17-9-10-18-28(6)22-14-24-30(8)20-12-16-26(3)4/h25-30H,9-24H2,1-8H3
254.5	C18H38	Octadecane	NMOC_p					2.13434e-05				4.21553e-06				1.73785e-06	3.65174e-05	InChI=1S/C18H38/c1-3-5-7-9-11-13-15-17-18-16-14-12-10-8-6-4-2/h3-18H2,1-2H3
268.5	C19H40	Nonadecane	NMOC_p					6.0473e-05				1.47543e-05				2.43299e-05	4.22833e-05	InChI=1S/C19H40/c1-3-5-7-9-11-13-15-17-19-18-16-14-12-10-8-6-4-2/h3-19H2,1-2H3
282.5	C20H42	Eicosane	NMOC_p					0.000121391		1.65816e-05	3.82072e-06	3.68859e-05				4.51841e-05	7.49568e-05	InChI=1S/C20H42/c1-3-5-7-9-11-13-15-17-19-20-18-16-14-12-10-8-6-4-2/h3-20H2,1-2H3
296.6	C21H44	Heneicosane	NMOC_p					0.000209432		4.46429e-05	9.5518e-06	4.11014e-05				3.99705e-05	7.49568e-05	InChI=1S/C21H44/c1-3-5-7-9-11-13-15-17-19-21-20-18-16-14-12-10-8-6-4-2/h3-21H2,1-2H3
310.6	C22H46	Docosane	NMOC_p					0.000237001		7.14286e-05	3.82072e-06	3.26703e-05				2.2592e-05	8.45666e-05	InChI=1S/C22H46/c1-3-5-7-9-11-13-15-17-19-21-22-20-18-16-14-12-10-8-6-4-2/h3-22H2,1-2H3
324.6	C23H48	Tricosane	NMOC_p					0.000264569		0.000239796	7.64144e-06	5.79635e-05				7.99411e-05	0.000144148	InChI=1S/C23H48/c1-3-5-7-9-11-13-15-17-19-21-23-22-20-18-16-14-12-10-8-6-4-2/h3-23H2,1-2H3
338.7	C24H50	Tetracosane	NMOC_p					0.000225884		0.00027551		4.4263e-05				2.2592e-05	0.000196041	InChI=1S/C24H50/c1-3-5-7-9-11-13-15-17-19-21-23-24-22-20-18-16-14-12-10-8-6-4-2/h3-24H2,1-2H3
352.7	C25H52	Pentacosane	NMOC_p					0.000297918		0.000214286		4.74247e-05				1.56406e-05	0.000155679	InChI=1S/C25H52/c1-3-5-7-9-11-13-15-17-19-21-23-25-24-22-20-18-16-14-12-10-8-6-4-2/h3-25H2,1-2H3
366.7	C26H54	Hexacosane	NMOC_p					0.000225884		0.000153061		2.00238e-05					0.000172977	InChI=1S/C26H54/c1-3-5-7-9-11-13-15-17-19-21-23-25-26-24-22-20-18-16-14-12-10-8-6-4-2/h3-26H2,1-2H3
380.7	C27H56	Heptacosane	NMOC_p					0.000303254		0.000343112		7.37717e-05				2.2592e-05	0.000211416	InChI=1S/C27H56/c1-3-5-7-9-11-13-15-17-19-21-23-25-27-26-24-22-20-18-16-14-12-10-8-6-4-2/h3-27H2,1-2H3
394.8	C28H58	Octacosane	NMOC_p					0.000264569		0.000322704	9.5518e-06	4.00475e-05					0.000119162	InChI=1S/C28H58/c1-3-5-7-9-11-13-15-17-19-21-23-25-27-28-26-24-22-20-18-16-14-12-10-8-6-4-2/h3-28H2,1-2H3
408.8	C29H60	Nonacosane	NMOC_p					0.000358391		0.000741071	2.1014e-05	0.000169675				0.000218969	0.000180665	InChI=1S/C29H60/c1-3-5-7-9-11-13-15-17-19-21-23-25-27-29-28-26-24-22-20-18-16-14-12-10-8-6-4-2/h3-29H2,1-2H3
422.8	C30H62	Triacontane	NMOC_p					0.000259233		0.000469388	9.5518e-06	9.59033e-05					0.000149914	InChI=1S/C30H62/c1-3-5-7-9-11-13-15-17-19-21-23-25-27-29-30-28-26-24-22-20-18-16-14-12-10-8-6-4-2/h3-30H2,1-2H3
436.8	C31H64	Hentriacontane	NMOC_p					0.000369508		0.00111224	1.52829e-05	0.000194968				1.56406e-05	0.000115318	InChI=1S/C31H64/c1-3-5-7-9-11-13-15-17-19-21-23-25-27-29-31-30-28-26-24-22-20-18-16-14-12-10-8-6-4-2/h3-31H2,1-2H3
450.9	C32H66	Dotriacontane	NMOC_p					0.00016719		0.000419643	9.5518e-06	5.26941e-05					0.000113396	InChI=1S/C32H66/c1-3-5-7-9-11-13-15-17-19-21-23-25-27-29-31-32-30-28-26-24-22-20-18-16-14-12-10-8-6-4-2/h3-32H2,1-2H3
464.9	C33H68	Tritriacontane	NMOC_p					0.000156074		0.000818878	1.33725e-05	0.000101173				1.21649e-05	0.000142226	InChI=1S/C33H68/c1-3-5-7-9-11-13-15-17-19-21-23-25-27-29-31-33-32-30-28-26-24-22-20-18-16-14-12-10-8-6-4-2/h3-33H2,1-2H3
478.9	C34H70	Tetratriacontane	NMOC_p					6.89214e-05		0.000216837	2.48347e-05	4.00475e-05				2.43299e-05	0.000151835	InChI=1S/C34H70/c1-3-5-7-9-11-13-15-17-19-21-23-25-27-29-31-33-34-32-30-28-26-24-22-20-18-16-14-12-10-8-6-4-2/h3-34H2,1-2H3
492.9	C35H72	Pentatriacontane	NMOC_p					3.64616e-05		0.00017602		2.42393e-05					0.00012685	InChI=1S/C35H72/c1-3-5-7-9-11-13-15-17-19-21-23-25-27-29-31-33-35-34-32-30-28-26-24-22-20-18-16-14-12-10-8-6-4-2/h3-35H2,1-2H3
162.14	C6H10O5	Levoglucosan	NMOC_p	0.0395306			0.0431803	0.0114834		0.00558801	0.00911242	0.00456436				0.031661	0.0107438	InChI=1S/C6H10O5/c7-3-2-1-10-6(11-2)5(9)4(3)8/h2-9H,1H2/t2-,3-,4+,5-,6-/m1/s1
521	C37H76	Heptatriacontane	NMOC_p					4.53547e-05										InChI=1S/C37H76/c1-3-5-7-9-11-13-15-17-19-21-23-25-27-29-31-33-35-37-36-34-32-30-28-26-24-22-20-18-16-14-12-10-8-6-4-2/h3-37H2,1-2H3
535	C38H78	Octriacontane	NMOC_p					0.000137843										InChI=1S/C38H78/c1-3-5-7-9-11-13-15-17-19-21-23-25-27-29-31-33-35-37-38-36-34-32-30-28-26-24-22-20-18-16-14-12-10-8-6-4-2/h3-38H2,1-2H3
549.1	C39H80	Nonatriacontane	NMOC_p					5.42478e-05										InChI=1S/C39H80/c1-3-5-7-9-11-13-15-17-19-21-23-25-27-29-31-33-35-37-39-38-36-34-32-30-28-26-24-22-20-18-16-14-12-10-8-6-4-2/h3-39H2,1-2H3
162.14	C6H10O5	Mannosan	NMOC_p					0.00129408										InChI=1S/C6H10O5/c7-3-2-1-10-6(11-2)5(9)4(3)8/h2-9H,1H2/t2-,3-,4+,5+,6-/m1/s1
162.14	C6H10O5	Galactosan	NMOC_p					7.55912e-06										InChI=1S/C6H10O5/c7-3-2-1-10-6(11-2)5(9)4(3)8/h2-9H,1H2/t2-,3+,4+,5-,6-/m1/s1
180.16	C6H12O6/C12H24O11	Galactose/Maltitol	NMOC_p					3.75733e-05										InChI=1S/C6H12O6/c7-1-2-3(8)4(9)5(10)6(11)12-2/h2-11H,1H2/t2-,3+,4+,5-,6?/m1/s1
92.09	C3H8O3	Glycerol	NMOC_p					0.00218221										InChI=1S/C3H8O3/c4-1-3(6)2-5/h3-6H,1-2H2
182.17	C6H14O6	Mannitol	NMOC_p					3.84626e-05										InChI=1S/C6H14O6/c7-1-3(9)5(11)6(12)4(10)2-8/h3-12H,1-2H2/t3-,4-,5-,6-/m1/s1
182.17	C9H10O4	Syringaldehyde	NMOC_p					5.11352e-05										InChI=1S/C9H10O4/c1-12-7-3-6(5-10)4-8(13-2)9(7)11/h3-5,11H,1-2H3
168.15	C8H8O4	Vanillic acid	NMOC_p					0.000204096										InChI=1S/C8H8O4/c1-12-7-4-5(8(10)11)2-3-6(7)9/h2-4,9H,1H3,(H,10,11)
198.17	C9H10O5	Syringic acid	NMOC_p					9.33774e-05										InChI=1S/C9H10O5/c1-13-6-3-5(9(11)12)4-7(14-2)8(6)10/h3-4,10H,1-2H3,(H,11,12)
386.7	C27H46O	Cholesterol	NMOC_p							8.67347e-05		2.63471e-05					2.11416e-05	InChI=1S/C27H46O/c1-18(2)7-6-8-19(3)23-11-12-24-22-10-9-20-17-21(28)13-15-26(20,4)25(22)14-16-27(23,24)5/h9,18-19,21-25,28H,6-8,10-17H2,1-5H3/t19-,21+,22+,23-,24+,25+,26+,27-/m1/s1
412.7	C29H48O	Stigmasterol	NMOC_p					1.20057e-05		0.00013648	5.15797e-05	6.53407e-05				0.000403181	1.72977e-05	InChI=1S/C29H48O/c1-7-21(19(2)3)9-8-20(4)25-12-13-26-24-11-10-22-18-23(30)14-16-28(22,5)27(24)15-17-29(25,26)6/h8-10,19-21,23-27,30H,7,11-18H2,1-6H3/b9-8+/t20-,21-,23+,24+,25-,26+,27+,28+,29-/m1/s1
414.7	C29H50O	b-Sitosterol	NMOC_p					2.93472e-05		0.000281888	0.000277002	0.000100119				0.000691664	7.68787e-05	InChI=1S/C29H50O/c1-7-21(19(2)3)9-8-20(4)25-12-13-26-24-11-10-22-18-23(30)14-16-28(22,5)27(24)15-17-29(25,26)6/h10,19-21,23-27,30H,7-9,11-18H2,1-6H3/t20-,21-,23+,24+,25-,26+,27+,28+,29-/m1/s1
400.7	C28H48O	Campesterol	NMOC_p					1.60076e-05		0.000169643	0.000116532	7.79873e-05				0.000333667	1.72977e-05	InChI=1S/C28H48O/c1-18(2)19(3)7-8-20(4)24-11-12-25-23-10-9-21-17-22(29)13-15-27(21,5)26(23)14-16-28(24,25)6/h9,18-20,22-26,29H,7-8,10-17H2,1-6H3/t19-,20-,22+,23+,24-,25+,26+,27+,28-/m1/s1
388.67	C27H48O	Cholestanol and coprostanol	NMOC_p							0.000119898		2.00238e-05						C27H48O_388.67
416.7	C29H52O	Stigmastanol	NMOC_p							0.000255102	2.48347e-05	5.26941e-05					3.84394e-06	InChI=1S/C29H52O/c1-7-21(19(2)3)9-8-20(4)25-12-13-26-24-11-10-22-18-23(30)14-16-28(22,5)27(24)15-17-29(25,26)6/h19-27,30H,7-18H2,1-6H3/t20-,21-,22+,23+,24+,25-,26+,27+,28+,29-/m1/s1
370.65	C27H46	17(H)-22,29,30-Trisnorhopane	NMOC_p														1.92197e-06	CAS53584-59-1
398.71	C29H50	17(H)-21(H)-30-Norhopane	NMOC_p					4.66887e-05									3.84394e-06	InChI=1S/C29H50/c1-8-20-12-17-26(4)21(20)13-18-28(6)23(26)10-11-24-27(5)16-9-15-25(2,3)22(27)14-19-29(24,28)7/h20-24H,8-19H2,1-7H3/t20-,21+,22+,23-,24-,26+,27+,28-,29-/m1/s1
412.73	C30H52	17(H)-21(H)-Hopane	NMOC_p					1.20057e-05									5.7659e-06	InChI=1S/C30H52/c1-20(2)21-12-17-27(5)22(21)13-18-29(7)24(27)10-11-25-28(6)16-9-15-26(3,4)23(28)14-19-30(25,29)8/h20-25H,9-19H2,1-8H3/t21-,22-,23+,24-,25-,27+,28+,29-,30-/m1/s1
		EF B abs 870 (m2 kg 1)	PM optical property				0.0343695	8.53736e-05	0.0260428	0.00719005	0.019532	0.00614055				0.0355903	0.549683	Babs_870
		EF B scat 870 (m 2 kg 1)	PM optical property				0.210514	0.0476705	0.0105465	0.0329439	0.0144502	0.0357421				0.316606	0.270998	Bscat_870
		EF Babs 405 (m2 kg1)	PM optical property					0.00600283		0.0604349	0.0916748	0.0546257		0.00237932		0.333201	0.477225	Babs_405
		EF B 405 (m2 kg1scat )	PM optical property					0.224995										B_405
		EF Babs 405 just BrC (m2 kg1)	PM optical property					0.0057805										Babs_405_Br
		EF Babs 405 just BC (m2 kg1)	PM optical property					0.000240113		0.0154458	0.0419575	0.0144968				0.147119		Babs_405_BC
		SSA 870 nm	PM optical property				0.00747767	0.00443342	0.00437688	0.00999617	0.0104917	0.00849218				0.015413	0.00632328	SSA_870
		SSA 405 nm	PM optical property	0.0066399	0.00853901		0.00711736	0.00421532	0.00962763	0.0107589	0.012393	0.00903926		0.00542089		0.0140505	0.0137382	SSA_405
		AAE	PM optical property	0.0208462	0.0279658		0.0245987	0.0281266	0.0314225	0.0329432	0.0335426	0.0311367				0.0575494	0.0186623	AAE
		SSA 532	PM optical property	0.006084	0.00918591		0.00679491	0.00440801	0.0103228							0.015548		SSA_532
		SSA 660	PM optical property	0.00577517	0.00903662		0.00660211	0.00441393	0.00983483							0.0158144		SSA_660
		XS_401/XS_870	PM optical property				0.405039		0.0801055									XS_401/XS_870
		EFabs401	PM optical property				0.124641		0.139485									Babs_401
		EFabs401 (BrC)	PM optical property				0.0820148		0.0808551									Babs_401_BrC
		EFscat401	PM optical property				0.877869		0.253206									Bscat_401
		BrC	PM optical property							0.0459063	0.0581145	0.040948		0.000947652		0.189879		BrC
		EF Bscat 405 (m2/kg)	PM optical property							0.385836	0.23575	0.440494		0.0111601		2.02147	1.66058	Bscat_405
		EF Babs 405 just BrC (m2/kg)	PM optical property							0.0449885	0.0568321	0.0401289				0.186082		Babs_405_BrC
